# Supplementary material for: The Genetic Architecture of the Genome-Wide Transcriptional Response to ER Stress in the Mouse
Source: PLoS Genet. 2015 Feb 4;11(2):e1004924. doi: 10.1371/journal.pgen.1004924 (PMC4412289; doi:10.1371/journal.pgen.1004924)
Supplement: S2 Table — (XLSX) [file pgen.1004924.s005.xlsx]

## Sheet: Sheet1
SUPPLEMENTAL TABLE 2: ER stress-induced genes with strain effect
					median log2(TM/control)
Ensembl	ID	Symbol	p	q	129	B6	NOD	NZO	PWK	WSB	AJ	CAST
ENSMUSG00000058427	MGI:1340094	Cxcl2	6.48239e-12	1.41446e-08	2.16123	5.3241	4.77082	4.84721	6.62219	3.87838	5.90145	4.67435
ENSMUSG00000040613	MGI:103298	Apobec1	8.95731e-10	6.51495e-07	1.61333	1.30793	1.91736	1.14807	1.43416	1.84329	1.97283	0.23175
ENSMUSG00000021701	MGI:1099790	Plk2	6.57721e-10	6.51495e-07	0.576438	0.963935	0.648294	0.924144	1.53227	1.18801	1.49361	0.8655
ENSMUSG00000029314	MGI:3603816	Agpat9	2.99186e-09	1.30565e-06	0.770234	1.35184	1.03983	1.36258	1.72497	0.33816	0.939765	1.29276
ENSMUSG00000026166	MGI:1329031	Ccl20	2.57152e-09	1.30565e-06	2.0027	4.96031	4.15954	4.63098	4.94659	5.06625	5.12195	4.2508
ENSMUSG00000000489	MGI:97528	Pdgfb	4.18839e-09	1.52318e-06	0.305002	1.81039	0.922939	1.82476	1.30079	0.689682	2.36702	1.1991
ENSMUSG00000034394	MGI:96787	Lif	5.15326e-09	1.60635e-06	1.29094	2.46237	2.08786	2.72749	3.13306	2.52841	2.8021	1.60172
ENSMUSG00000029380	MGI:108068	Cxcl1	6.35021e-09	1.73202e-06	1.8899	4.11815	3.81001	4.15811	5.19006	4.07822	4.23553	4.3975
ENSMUSG00000017737	MGI:97011	Mmp9	7.62222e-09	1.84797e-06	-0.0631661	0.776455	1.16551	1.46962	1.05292	0.700664	1.41522	1.33235
ENSMUSG00000030142	MGI:1861232	Clec4e	1.12263e-08	2.44958e-06	0	2.73212	0	1.56395	1.22822	0	2.60463	3.04
ENSMUSG00000026822	MGI:96757	Lcn2	1.70674e-08	3.38555e-06	-0.66397	2.18102	0.777009	-0.558937	1.23876	-2.24116	1.9356	0.809276
ENSMUSG00000022951	MGI:1890564	Rcan1	2.00721e-08	3.64977e-06	0.532984	1.09983	0.525203	1.04595	1.16568	1.49021	1.04318	0.582374
ENSMUSG00000033538	MGI:107700	Casp4	4.23505e-08	7.10837e-06	2.32577	2.15804	1.97344	3.04383	2.82076	-0.0478887	3.20434	1.95492
ENSMUSG00000025823	MGI:104864	Pdia4	7.48483e-08	1.16656e-05	1.21742	1.70887	1.58074	1.78911	1.26368	1.97585	1.67281	1.43894
ENSMUSG00000028645	MGI:95755	Slc2a1	1.05894e-07	1.5404e-05	-0.097448	0.179861	0.0904189	0.251848	0.640421	0.102183	0.217666	0.105825
ENSMUSG00000024401	MGI:104798	Tnf	1.21292e-07	1.65413e-05	-0.21881	3.32932	-0.171365	2.18383	2.33058	0.487573	2.87085	2.44552
ENSMUSG00000032000	MGI:1197007	Birc3	1.63123e-07	2.09373e-05	0.643369	0.998303	1.62845	1.72732	2.10471	0.831064	1.6221	0.932118
ENSMUSG00000021226	MGI:2159605	Acot2	2.60554e-07	2.89061e-05	1.97651	1.11299	1.86955	2.41055	2.27256	1.38489	2.13331	1.71599
ENSMUSG00000074570	MGI:2444482	Cass4	2.43898e-07	2.89061e-05	3.28121	2.25256	2.87195	3.40622	3.82727	2.98869	3.60335	3.01402
ENSMUSG00000000732	MGI:1354701	Icosl	2.6495e-07	2.89061e-05	-0.560269	1.11723	0.173371	1.17461	1.02049	-1.38826	2.07621	0.903902
ENSMUSG00000032715	MGI:1345675	Trib3	3.21751e-07	3.34315e-05	3.96453	1.93918	2.28522	3.51403	2.29476	2.69869	2.8013	2.22839
ENSMUSG00000027995	MGI:1346060	Tlr2	3.41927e-07	3.39129e-05	0.659978	1.42317	1.37114	1.38499	2.47816	0.671443	1.73153	1.13953
ENSMUSG00000022126	MGI:103206	Irg1	4.38211e-07	4.13139e-05	-0.298214	2.60658	0.62034	2.54021	1.17057	0	2.91956	2.85617
ENSMUSG00000019850	MGI:1196377	Tnfaip3	4.54415e-07	4.13139e-05	0.958117	1.88087	1.97271	2.52129	2.73108	1.49452	2.35581	2.02654
ENSMUSG00000030347	MGI:107893	D6Wsu163e	5.85168e-07	5.10734e-05	0.186934	0.253041	0.996723	1.06289	1.21179	1.03154	1.0301	0.986456
ENSMUSG00000045502	MGI:1933383	Niacr1	6.48621e-07	5.44343e-05	1.11224	1.00231	0.499635	0.450536	1.96355	-1.57792	1.49645	0.638552
ENSMUSG00000028972	MGI:1333786	Car6	7.11629e-07	5.75102e-05	3.02854	0.744618	1.26262	2.60057	2.26265	1.53761	2.3436	1.4372
ENSMUSG00000026875	MGI:101836	Traf1	7.78292e-07	6.06512e-05	0.677879	1.85391	2.093	2.02193	2.1825	0.997282	1.9047	1.86397
ENSMUSG00000022070	MGI:1924994	Bora	9.5082e-07	7.1541e-05	0.587876	0.442758	0.318848	0.730463	0.337395	0.646764	0.507549	0.312339
ENSMUSG00000029201	MGI:1306785	Ugdh	1.11301e-06	8.09527e-05	0.139227	0.168164	-0.0681696	0.225075	0.507052	0.661757	-0.109992	0.463189
ENSMUSG00000026475	MGI:108407	Rgs16	1.42877e-06	0.000100389	0.67213	0.722121	0.688992	1.13565	1.21297	0.696041	0.964746	0.620254
ENSMUSG00000028893	MGI:2651874	Sesn2	1.47226e-06	0.000100389	0.885276	0.669026	0.981416	1.26134	1.1199	1.48905	0.857238	2.14516
ENSMUSG00000051615	MGI:97855	Rap2a	1.70529e-06	0.000112756	-0.130868	-0.230898	-0.153006	0.0836982	0.341271	-0.074712	0.063653	0.0109982
ENSMUSG00000037509	MGI:2442507	Arhgef4	2.33074e-06	0.000133834	-0.281325	1.40346	0.383065	0.37851	1.51665	-0.202685	0.229343	0.521895
ENSMUSG00000022144	MGI:107430	Gdnf	2.31501e-06	0.000133834	0.96618	0.816661	0.951488	1.31772	1.80156	1.51568	1.59149	1.41329
ENSMUSG00000033854	MGI:1919508	Kcnk10	2.09332e-06	0.000133834	0.259358	1.69491	1.02	1.58578	1.87636	1.20808	1.44288	0.459232
ENSMUSG00000068882	MGI:98423	Ssb	2.28422e-06	0.000133834	0.704193	0.489731	0.0478014	0.444146	0.357258	0.824064	0.472327	0.313508
ENSMUSG00000020303	MGI:1316731	Stc2	2.21561e-06	0.000133834	1.51095	1.44228	0.504089	1.2193	1.93629	1.21133	1.47313	1.72622
ENSMUSG00000027398	MGI:96543	Il1b	2.80592e-06	0.000156988	0	1.91938	0	1.88928	1.83409	0	2.64612	1.87106
ENSMUSG00000018916	MGI:1339752	Csf2	3.23173e-06	0.000176291	1.71361	2.95226	3.31023	3.66692	4.34928	2.20751	3.97449	2.70116
ENSMUSG00000002289	MGI:1888999	Angptl4	4.03112e-06	0.000199907	0.233795	0.232783	0.460716	0.368652	0.753694	-0.678856	0.376769	0.580367
ENSMUSG00000027244	MGI:1196429	Atg13	4.00818e-06	0.000199907	0.392454	0.572404	0.477069	0.594167	0.769922	0.155445	0.279775	0.640097
ENSMUSG00000062345	MGI:97609	Serpinb2	4.01078e-06	0.000199907	0.655023	1.0396	0.713333	1.67314	1.79383	0.542948	1.0048	0.951167
ENSMUSG00000021621	MGI:1916335	Zcchc9	4.00385e-06	0.000199907	0.335992	0.412226	0.216916	0.0754446	0.0303949	0.728241	0.233933	0.0166444
ENSMUSG00000021025	MGI:104741	Nfkbia	4.3958e-06	0.000213148	1.03878	1.5891	1.48601	1.6051	1.91498	1.51825	2.01784	1.03705
ENSMUSG00000033717	MGI:87934	Adra2a	4.91089e-06	0.000224302	0.347718	0.359182	0.217607	0.479826	-0.151105	0.673518	0.454322	0.0626555
ENSMUSG00000027313	MGI:1916315	Chac1	4.8889e-06	0.000224302	3.29278	1.79054	2.87089	3.34856	2.75337	2.14004	2.8974	2.52114
ENSMUSG00000040435	MGI:1927072	Ppp1r15a	4.93424e-06	0.000224302	1.53736	1.58361	1.51993	1.67878	2.52705	2.11085	1.98777	1.61491
ENSMUSG00000015396	MGI:1328316	Cd83	5.80812e-06	0.000258639	0.41158	1.0058	0.423511	0.656071	1.59218	-0.352754	2.04629	1.51798
ENSMUSG00000022369	MGI:2146005	Mtbp	6.44569e-06	0.00028129	0.974881	0.626864	0.99693	1.05723	0.0940298	0.544049	1.23425	0.128329
ENSMUSG00000029422	MGI:1913489	Rsrc2	6.69455e-06	0.000286422	0.986294	0.822562	0.591046	0.928974	0.833099	1.10583	0.908699	0.523608
ENSMUSG00000046731	MGI:2448712	Kctd11	6.94026e-06	0.000291224	0.4446	0.485537	0.777208	0.959445	1.19466	1.01344	0.918119	1.03878
ENSMUSG00000040026	MGI:98223	Saa3	8.73578e-06	0.00035965	0.517279	1.3711	-0.0739142	0.668611	1.46579	-0.91552	1.99967	0.669672
ENSMUSG00000078349	MGI:2140540	AW011738	9.36687e-06	0.000373926	0.187936	0.914133	1.07675	0.396006	-0.382708	1.01417	1.57327	0.990242
ENSMUSG00000090272	MGI:3780953	Mndal	9.59663e-06	0.000373926	1.28664	0.629299	1.07866	0.0974676	0.874648	-2.00864	1.02955	-0.127442
ENSMUSG00000030559	MGI:1919683	Rab38	9.51808e-06	0.000373926	0.958734	1.77588	1.2937	1.31086	0.919986	1.95424	1.57518	1.17825
ENSMUSG00000026628	MGI:109384	Atf3	1.02597e-05	0.000381843	2.80027	2.92792	2.51519	3.24772	4.07658	3.07929	3.68712	3.17953
ENSMUSG00000000982	MGI:98260	Ccl3	1.02485e-05	0.000381843	0	2.60658	0	1.84283	1.14341	0	1.89558	0.809276
ENSMUSG00000022974	MGI:1914617	Gcfc1	1.04086e-05	0.000381843	0.900841	0.748036	0.629175	1.02104	0.948214	0.264931	0.637891	0.499169
ENSMUSG00000031700	MGI:1915391	Gpt2	1.04998e-05	0.000381843	0.961488	0.869173	1.04826	1.25603	1.08793	0.376009	1.05325	0.904332
ENSMUSG00000005125	MGI:1341799	Ndrg1	1.12428e-05	0.000389394	0.405961	0.672949	0.405982	0.308164	0.793897	0.228635	0.754221	4.78734e-05
ENSMUSG00000028680	MGI:109604	Plk3	1.10745e-05	0.000389394	0.62303	0.535565	0.691877	0.780669	1.24913	0.94259	0.827592	0.829425
ENSMUSG00000042129	MGI:2386853	Rassf4	1.11987e-05	0.000389394	0.0670152	1.15054	-0.838028	0.636649	0.18216	-0.722949	1.50766	0.734402
ENSMUSG00000030103	MGI:1097714	Bhlhe40	1.1585e-05	0.000394978	0.71388	0.722732	1.17474	1.25396	1.07204	1.1489	0.940415	1.22312
ENSMUSG00000027356	MGI:2443583	Fermt1	1.29017e-05	0.000433099	0.0771994	0.594178	0.735958	0.586182	1.03654	-1.72134	0.664666	0.708622
ENSMUSG00000033669	MGI:99208	Zfp7	1.4524e-05	0.000480173	-0.243107	0.228573	0.271201	0.116464	0.234429	-0.00250722	0.330883	0.580842
ENSMUSG00000039934	MGI:2442259	Pion	1.49301e-05	0.00048623	0.196696	0.583777	0.416856	0.946145	0.447062	-0.271965	0.963731	0.874069
ENSMUSG00000027014	MGI:2136773	Cwc22	1.69707e-05	0.000514307	0.141965	0.51252	0.531248	0.763083	0.639215	0.254419	0.560409	0.473951
ENSMUSG00000026535	MGI:1347083	Ifi202b	1.67775e-05	0.000514307	1.30998	-0.10068	0.608912	0.931613	1.30082	0.99434	0.992503	-0.342923
ENSMUSG00000022967	MGI:107658	Ifnar1	1.63123e-05	0.000514307	0.177706	0.374886	0.456572	0.552446	0.00232902	0.167871	0.626372	-0.0751876
ENSMUSG00000028675	MGI:106512	Pnrc2	1.6615e-05	0.000514307	0.815197	1.13739	0.888557	0.40073	1.21409	1.35335	0.500843	0.799477
ENSMUSG00000054855	MGI:2444878	Rnd1	1.62182e-05	0.000514307	0.805971	1.3024	1.17967	1.47034	1.58235	1.97047	1.17723	1.0427
ENSMUSG00000020607	MGI:2145011	Fam84a	1.86491e-05	0.000557429	-0.0499075	-0.520664	-0.256634	-0.122139	0.576712	-1.28105	-0.79809	0.254111
ENSMUSG00000024486	MGI:96070	Hbegf	2.00609e-05	0.000591526	0.534633	0.473061	0.351957	0.541217	1.07152	0.729282	0.478547	0.429241
ENSMUSG00000020423	MGI:108384	Btg2	2.04141e-05	0.000593914	0.315297	0.642222	0.385237	0.868224	0.908499	0.666759	0.882339	0.224706
ENSMUSG00000058503	MGI:1915402	Fam133b	2.07253e-05	0.000595034	0.783818	0.690294	0.455274	0.686175	0.719985	1.0373	0.519437	0.274176
ENSMUSG00000027338	MGI:1346999	Prnd	2.16567e-05	0.0006137	-0.58998	0.346053	1.31719	1.3051	0.842328	0.462179	1.21977	0.847259
ENSMUSG00000022895	MGI:95456	Ets2	2.23822e-05	0.000618201	0.773137	1.07241	1.10986	1.10122	1.55276	0.9728	1.05873	0.766182
ENSMUSG00000037514	MGI:1921700	Pank2	2.21789e-05	0.000618201	0.293649	0.0985288	0.0354093	0.177108	0.106695	0.570427	0.228808	-0.00247219
ENSMUSG00000036718	MGI:2444818	Micall2	2.30983e-05	0.000630005	0.0452715	0.230139	0.45368	0.358333	0.41331	0.205618	0.528981	0.173032
ENSMUSG00000031872	MGI:1929597	Bean1	2.42645e-05	0.000653643	-0.30762	-0.442707	-0.394653	-0.105599	0.956378	-0.0288814	-0.21778	-0.0890394
ENSMUSG00000078307	MGI:2143099	AI593442	2.52903e-05	0.000672967	0.489853	0.405282	0.580708	-0.360404	2.13682	0.578656	0.194313	2.16887
ENSMUSG00000024521	MGI:1930146	Pmaip1	2.59655e-05	0.00068261	0.349958	0.566413	0.243655	0.807636	1.04226	0.764438	0.563601	0.378865
ENSMUSG00000027438	MGI:104562	Napb	2.72438e-05	0.00070769	1.77819	2.15724	1.7639	2.56384	1.59517	2.03325	2.69483	1.83927
ENSMUSG00000058402	MGI:1920979	Zfp420	2.90448e-05	0.000745597	0.712427	0.480133	0.21608	2.06764	0.496559	0.480531	1.41866	0.956554
ENSMUSG00000023034	MGI:1352454	Nr4a1	2.943e-05	0.000746701	0.220727	0.205715	0.0567314	0.79417	0.569064	0.367701	-0.0888333	0.367467
ENSMUSG00000068536	MGI:3618290	Doxl2	3.20445e-05	0.000803691	-0.0260641	0.235215	0.649776	-0.577828	1.13766	-0.371956	0.246587	0.823067
ENSMUSG00000037447	MGI:2443039	Arid5a	3.58018e-05	0.000858449	1.16065	1.28726	1.36895	1.78728	2.08492	1.58525	1.74178	1.57293
ENSMUSG00000019122	MGI:104533	Ccl9	3.58606e-05	0.000858449	0.214218	0.805111	1.11121	0.895573	0.762212	0.255566	1.26238	0.207585
ENSMUSG00000027680	MGI:104860	Fxr1	3.61949e-05	0.000858449	0.459572	0.279724	0.0803164	0.324244	0.268276	0.460139	0.236693	0.0478282
ENSMUSG00000027962	MGI:98926	Vcam1	3.49921e-05	0.000858449	0.767032	0.606213	1.14516	1.32771	1.23928	0.552688	1.35737	1.09719
ENSMUSG00000042677	MGI:2385891	Zc3h12a	3.58186e-05	0.000858449	0.55208	0.550692	1.31091	1.19602	0.987199	0.737743	0.923561	0.837131
ENSMUSG00000042759	MGI:2176230	Apobr	3.70452e-05	0.000869167	1.27765	1.05332	1.4637	0.713966	1.55114	1.51794	0.564358	-0.16834
ENSMUSG00000034379	MGI:1916794	Wdr5b	3.86231e-05	0.00089655	0.404029	-0.409658	0.370174	0.166059	-0.571458	1.11983	-0.255812	0.0941885
ENSMUSG00000036067	MGI:2443286	Slc2a6	4.1229e-05	0.000946966	1.23118	2.52338	2.54939	2.21665	2.47971	2.4055	2.66593	2.28527
ENSMUSG00000048065	MGI:2444415	Cyb5r2	4.39826e-05	0.00095308	0.84248	1.4525	0.82969	-0.288262	2.13153	-0.625066	1.72723	1.67757
ENSMUSG00000079254	MGI:3042776	Itprip	4.32744e-05	0.00095308	-0.112898	-0.141834	-0.0552122	0.0339545	0.476698	-0.146191	0.0567793	0.440189
ENSMUSG00000047180	MGI:2429944	Neurl3	4.4116e-05	0.00095308	1.23657	0.50879	2.26761	1.88618	2.01108	0.455687	1.87171	1.48338
ENSMUSG00000023947	MGI:1194908	Nfkbie	4.30675e-05	0.00095308	0.618576	0.784964	1.4883	1.18625	1.63322	1.07001	1.47292	0.881221
ENSMUSG00000038963	MGI:1351866	Slco4a1	4.30956e-05	0.00095308	-0.155874	0.437298	0.433547	0.63324	1.33179	0.462473	0.670979	0.504063
ENSMUSG00000072620	MGI:1313258	Slfn2	4.29472e-05	0.00095308	0.279994	1.5489	0.755889	1.17703	1.15109	1.50114	1.78192	2.23379
ENSMUSG00000018845	MGI:2443377	Unc45b	4.49724e-05	0.000962056	0.525809	0.576403	0.312386	0.478542	0.18623	-1.73482	0.799357	0.126665
ENSMUSG00000037759	MGI:97794	Ptger2	4.75541e-05	0.00100741	0.718468	1.19488	1.28143	1.68933	2.40489	0.455921	0.687902	0.809358
ENSMUSG00000050936	MGI:2448413	Hist2h2bb	5.32783e-05	0.00111782	0.596387	0.0934414	1.4072	1.56972	1.15812	0.671042	1.44396	1.3028
ENSMUSG00000027737	MGI:1347355	Slc7a11	5.45577e-05	0.00113376	0.18349	1.47341	2.0989	2.59374	1.85938	0.954441	1.02071	1.88687
ENSMUSG00000039756	MGI:1923173	Dnttip2	6.15519e-05	0.00125958	0.71275	0.540516	0.392722	0.728011	0.536102	0.915752	0.588745	0.418344
ENSMUSG00000026353	MGI:1915062	Ubxn4	6.1767e-05	0.00125958	0.183996	0.214981	0.048879	0.268143	0.218724	0.402929	0.0853752	0.104118
ENSMUSG00000027188	MGI:2445082	Pamr1	6.44101e-05	0.00128938	0.0885494	-0.833947	1.74014	-0.304606	0.13792	-0.665606	0.272036	0.747076
ENSMUSG00000029333	MGI:2443755	Rasgef1b	6.43101e-05	0.00128938	1.05934	0.50879	0.57307	1.62989	2.8472	0.303817	1.63742	1.41697
ENSMUSG00000054582	MGI:1922908	Pabpc1l	6.52033e-05	0.0012934	-0.0837171	0.0747256	0.46576	-0.112374	-0.148138	0.232438	1.26926	-0.530135
ENSMUSG00000032724	MGI:2139365	Abtb2	7.14974e-05	0.0013749	-0.00842682	0.423262	0.584852	0.711008	1.10564	0.342742	0.60776	0.432068
ENSMUSG00000021895	MGI:1918954	Arhgef3	7.10835e-05	0.0013749	0.82747	0.358906	0.615447	0.755885	1.28374	-0.41157	1.21222	0.961534
ENSMUSG00000032515	MGI:2387989	Csrnp1	7.18324e-05	0.0013749	0.231785	0.402091	0.487471	0.658108	0.692601	0.890027	0.752983	0.328466
ENSMUSG00000037376	MGI:1914176	Trmt6	7.07983e-05	0.0013749	0.754823	0.583035	0.402517	0.742561	0.893996	0.892862	0.643796	0.303969
ENSMUSG00000054136	MGI:2675256	Adm2	7.75502e-05	0.00142511	2.85032	1.45217	1.60231	2.46957	2.28302	1.98094	2.55093	1.60695
ENSMUSG00000015340	MGI:88574	Cybb	7.83743e-05	0.00142511	0.284207	2.15245	-0.131733	1.14797	1.34668	-0.31982	1.49972	1.65076
ENSMUSG00000060733	MGI:1916968	Ipmk	7.78196e-05	0.00142511	-0.0496195	0.207188	0.0521831	0.178976	0.507109	-0.0895264	-0.230778	-0.027091
ENSMUSG00000020120	MGI:1860485	Plek	7.61847e-05	0.00142511	0.870585	1.63235	0.515414	1.08573	0.991264	-0.128465	1.78442	1.12231
ENSMUSG00000024640	MGI:2183441	Psat1	7.63291e-05	0.00142511	0.553943	0.302237	0.336993	0.527181	0.332617	0.455622	0.422568	0.175747
ENSMUSG00000036036	MGI:99204	Zfp57	7.67084e-05	0.00142511	1.32206	1.45913	1.45696	1.59013	1.76581	1.93905	1.74459	1.42772
ENSMUSG00000021965	MGI:3041235	F630043A04Rik	8.26858e-05	0.00147886	0.184111	0.239645	0.240736	0.292648	0.234125	0.834216	0.269419	0.107521
ENSMUSG00000009772	MGI:1921387	Nuak2	8.20699e-05	0.00147886	-0.263543	0.0248217	0.110504	0.244027	0.165733	0.410743	0.243005	0.177017
ENSMUSG00000039396	MGI:2384588	Neil3	8.36747e-05	0.00148438	0.246565	0.263041	0.648018	0.275213	0.469963	1.23488	0.0814718	0.0365255
ENSMUSG00000043259	MGI:1918971	Fam13c	8.66861e-05	0.0015254	1.55216	1.96912	2.34266	1.28577	1.93666	1.76149	0.915807	1.46603
ENSMUSG00000029578	MGI:1923831	Wipi2	8.77218e-05	0.00153127	0.0783838	0.210806	0.173794	0.325677	0.475708	0.378638	0.229328	0.0840913
ENSMUSG00000055301	MGI:87926	Adh7	8.89623e-05	0.0015406	1.36219	0.935907	0.817369	1.05856	1.0904	0.726349	0.879717	0.513836
ENSMUSG00000028838	MGI:1888742	Extl1	0.000100592	0.00172828	1.55076	1.53468	1.09689	1.18681	2.7106	0.984415	2.04939	2.01554
ENSMUSG00000028986	MGI:1196453	Klhl7	0.000104196	0.00177621	0.483089	0.182742	0.15743	0.35131	-0.0911705	0.722859	0.0565954	0.119915
ENSMUSG00000039103	MGI:1916060	Nexn	0.000107082	0.00181126	0.909108	0.638776	0.197299	0.523598	0.652371	0.917164	0.488418	0.217798
ENSMUSG00000022602	MGI:88067	Arc	0.000108498	0.0018211	0.0892829	1.28321	0.0608037	0.571495	0.697359	1.08703	0.787777	0.536058
ENSMUSG00000020728	MGI:1923673	Ccdc46	0.000110076	0.00183348	0.154971	0.996865	0.234248	0.584757	0.619493	0.472172	-0.0015342	-0.0123843
ENSMUSG00000026696	MGI:1858730	Vamp4	0.000112678	0.00186259	0.652217	0.0836637	0.0768596	0.286954	-0.0193596	0.407276	0.213602	0.121488
ENSMUSG00000032691	MGI:2653833	Nlrp3	0.000114001	0.00187031	0.844719	2.47904	2.17462	1.87437	2.44498	1.1416	3.48999	2.03363
ENSMUSG00000034765	MGI:2685183	Dusp5	0.000116488	0.00188279	0.353588	0.20867	0.383554	0.40811	1.26395	0.698678	0.396038	0.31453
ENSMUSG00000029844	MGI:96170	Hoxa1	0.000116256	0.00188279	1.90492	2.25478	2.23466	2.40035	2.02132	3.27852	2.77415	2.44774
ENSMUSG00000019977	MGI:1891704	Hbs1l	0.000118642	0.00189964	0.395968	0.337167	0.109726	0.306088	0.370426	0.488933	0.247239	0.00656575
ENSMUSG00000001518	MGI:1915450	Itfg2	0.000119271	0.00189964	0.404739	0.179196	0.421621	0.178654	0.71712	0.673145	0.132327	0.390599
ENSMUSG00000028793	MGI:1922484	Rnf19b	0.000120641	0.00190753	-0.235204	0.128932	0.158403	0.143059	0.79783	0.123204	0.271009	0.226416
ENSMUSG00000074141	MGI:109552	Il4i1	0.000122875	0.00191509	-0.418779	0.53748	0.157027	-0.00347672	1.16292	-0.0355842	0.271589	0.335143
ENSMUSG00000023045	MGI:1332226	Soat2	0.000122549	0.00191509	1.92374	1.41521	1.98977	2.42013	1.88582	2.37873	1.14057	1.88946
ENSMUSG00000066037	MGI:1891692	Hnrnpr	0.000124097	0.00192042	0.461205	0.268072	0.078755	0.330424	0.242143	0.335708	0.120781	0.130902
ENSMUSG00000036768	MGI:1098258	Kif15	0.000125382	0.00192664	0.583397	0.378845	0.112773	0.732713	0.0705509	0.945657	0.198282	0.213404
ENSMUSG00000041057	MGI:1919765	Wdr43	0.000129025	0.00196875	0.693228	0.486816	0.358003	0.687119	0.629724	0.72513	0.535942	0.415141
ENSMUSG00000021428	MGI:1918590	Riok1	0.000134791	0.00204246	0.63437	0.485896	0.47996	0.717662	0.801144	0.928601	0.503195	0.390852
ENSMUSG00000037580	MGI:95675	Gch1	0.000137504	0.00206173	1.24515	0.690132	0.89617	1.27694	1.96914	1.00564	1.23575	0.83197
ENSMUSG00000004462	MGI:1917823	Tbccd1	0.000137952	0.00206173	0.637014	0.948518	0.702867	0.791381	0.169586	0.922547	0.74016	1.0625
ENSMUSG00000002983	MGI:103289	Relb	0.000146405	0.00217317	1.09619	1.34229	1.36024	1.54241	1.94985	1.48375	1.62258	1.06928
ENSMUSG00000027006	MGI:1914111	Dnajc10	0.000150012	0.00221167	0.443038	0.441429	0.215519	0.544525	0.26552	0.504072	0.093732	0.272504
ENSMUSG00000034855	MGI:1352450	Cxcl10	0.00015258	0.00223443	1.43073	0.992786	1.99563	2.24834	1.15264	0.0484998	1.94418	-0.0255428
ENSMUSG00000032425	MGI:1918890	Zfp949	0.000155908	0.00226794	0.628899	0.402137	0.496853	0.102203	0.0373013	0.32629	0.462177	0.38637
ENSMUSG00000028214	MGI:99844	Gem	0.000165946	0.00234603	0.787491	1.48652	0.97273	1.49931	1.77422	1.50748	1.60126	1.22665
ENSMUSG00000041975	MGI:2385142	Mettl8	0.000166652	0.00234603	0.856032	0.589362	0.279457	-0.187994	0.412187	0.766797	0.385333	0.293331
ENSMUSG00000056749	MGI:109495	Nfil3	0.000164737	0.00234603	2.2658	1.77688	2.16768	2.36933	2.47501	2.5922	2.15532	2.01728
ENSMUSG00000032369	MGI:893575	Plscr1	0.000166288	0.00234603	0.369905	0.141897	0.301756	0.754535	0.809471	0.547298	0.909337	0.608123
ENSMUSG00000037754	MGI:2151841	Ppp1r16b	0.00016499	0.00234603	0.301008	1.41145	1.13952	1.40368	1.89279	0.495069	1.79603	0.745904
ENSMUSG00000056313	MGI:1916318	1810011O10Rik	0.00017168	0.00239326	0.926383	0.784275	0.789346	1.40577	1.82117	1.38476	1.52664	0.908276
ENSMUSG00000026020	MGI:1933184	Nop58	0.000172201	0.00239326	0.833156	0.754557	0.418714	0.697464	0.601209	0.826754	0.847183	0.419415
ENSMUSG00000038067	MGI:1339751	Csf3	0.000175387	0.00240688	0.759808	0.770409	1.56365	1.11893	1.1468	-0.37916	0.700931	0.255884
ENSMUSG00000021998	MGI:104808	Lcp1	0.000175121	0.00240688	-0.511174	0.946217	-0.417431	0.271709	0.122052	-1.51895	0.530649	-0.134578
ENSMUSG00000057895	MGI:1277119	Zfp105	0.00018223	0.00248516	1.20511	1.04349	0.84809	1.30865	1.41408	1.51975	1.13929	0.751015
ENSMUSG00000020098	MGI:94873	Pcbd1	0.000186211	0.00252367	-0.176267	-0.415869	0.134739	-0.703956	-0.150505	1.5301	-0.508576	-0.549034
ENSMUSG00000022827	MGI:1914907	Rabl3	0.00019374	0.00260952	0.622696	0.673174	0.0215604	0.248463	0.225784	0.382612	0.600139	0.333859
ENSMUSG00000071341	MGI:99252	Egr4	0.000204506	0.00273762	0.556487	1.25426	0.85756	1.75393	1.34116	2.14661	2.12451	0.560961
ENSMUSG00000039232	MGI:1921982	Stx11	0.000210027	0.00279438	0.606497	0.861959	1.7711	1.37011	1.27977	1.41589	1.53867	1.25749
ENSMUSG00000029836	MGI:108515	Cbx3	0.000215007	0.00281086	0.626502	0.501242	0.0824373	0.414504	-0.113551	0.686197	0.0752019	0.100655
ENSMUSG00000051985	MGI:3045352	Igfn1	0.000214776	0.00281086	0.34422	-0.452193	0.16466	-1.26882	-0.546758	1.57232	-0.278743	-0.434823
ENSMUSG00000020459	MGI:1924034	Mtif2	0.00021513	0.00281086	0.581833	0.541369	-0.0752595	0.471849	0.132284	0.640225	0.430537	0.323581
ENSMUSG00000066551	MGI:96113	Hmgb1	0.000217466	0.00282447	0.515759	0.276016	-0.135269	0.177838	0.200468	0.651875	0.00360444	0.0120284
ENSMUSG00000052565	MGI:107502	Hist1h1d	0.000227295	0.00287688	0.0656284	0.723707	0.220316	0.662433	1.07192	0.811494	0.00550907	0.902962
ENSMUSG00000070407	MGI:1333853	Hs3st3b1	0.000226278	0.00287688	0.858505	0.958829	0.97589	0.716184	1.89365	0.696596	0.469802	1.39661
ENSMUSG00000026873	MGI:1921266	Phf19	0.00022484	0.00287688	-0.0085536	-0.0227937	0.150363	0.137763	0.135186	0.674663	0.0774225	0.156942
ENSMUSG00000024261	MGI:101759	Syt4	0.000228094	0.00287688	0.502932	0.279172	0.481929	1.1253	1.89166	0.238398	0.603685	0.724938
ENSMUSG00000031939	MGI:1922566	Taf1d	0.000227507	0.00287688	1.73178	1.49913	1.21198	1.66585	1.46602	1.82571	1.82797	1.0696
ENSMUSG00000053475	MGI:1195266	Tnfaip6	0.000233653	0.00293006	1.18889	0.994814	0.405595	1.31473	2.01383	0.913949	0.805557	0.78382
ENSMUSG00000033931	MGI:1098653	Rbm34	0.000239293	0.00298364	0.645362	0.691552	0.259789	0.637378	0.458103	0.833653	0.472561	0.127492
ENSMUSG00000071855	MGI:1918800	Ccdc112	0.000249289	0.00303906	0.812518	0.626575	0.592118	0.874933	0.643174	0.921427	0.293855	0.595019
ENSMUSG00000037405	MGI:96392	Icam1	0.000249072	0.00303906	-0.129492	1.38414	1.11655	1.06877	1.05781	0.602587	1.02777	0.505983
ENSMUSG00000050578	MGI:1340026	Mmp13	0.000249308	0.00303906	0.273559	1.5919	0.908754	1.20845	0.615749	0.836224	1.08467	0.660353
ENSMUSG00000035356	MGI:1931595	Nfkbiz	0.000248166	0.00303906	0.285028	0.26193	0.71817	0.810174	1.11905	0.121676	0.54635	0.689084
ENSMUSG00000017499	MGI:1345150	Cdc6	0.000251402	0.00304755	0.585315	1.44606	1.18712	1.33802	0.701981	1.55833	1.24521	0.711616
ENSMUSG00000033213	MGI:3034182	AA467197	0.000263418	0.00317557	0.698502	1.90147	0.00746459	0.842365	2.16228	0.938601	1.21471	1.02527
ENSMUSG00000027560	MGI:1924079	Dok5	0.000266761	0.0031982	0.785907	0.938595	0.971627	1.00045	1.31309	1.39352	1.18312	1.56265
ENSMUSG00000040584	MGI:97570	Abcb1a	0.000271739	0.00324008	-0.0515586	0.161818	0.366567	0.742736	0.713193	0.426922	0.673119	-0.146409
ENSMUSG00000019715	MGI:1921662	Gle1	0.000275409	0.00326599	0.0160262	0.0843675	0.0124067	0.440983	0.0362087	0.391752	0.0357511	0.259722
ENSMUSG00000047669	MGI:1920640	Msl3l2	0.000279869	0.00330094	-0.179983	0.168734	0.0706707	-0.32715	0.456493	0.893645	-0.266045	0.265644
ENSMUSG00000029826	MGI:1926031	Zc3hav1	0.00028396	0.00333119	0.165734	0.508079	0.402298	0.653995	1.44062	0.756058	0.466191	1.24578
ENSMUSG00000071303	MGI:3647445	Rps8-ps1	0.000293762	0.00342775	-0.180087	-0.834133	0.201869	0.531161	0.0516521	1.84555	0.422626	-0.681864
ENSMUSG00000087259	MGI:1919636	2610035D17Rik	0.000298611	0.0034658	1.54606	0.775143	0.992201	1.06713	0.0598123	1.84165	1.35542	0.365684
ENSMUSG00000032519	MGI:2384782	Slc25a38	0.000301751	0.0034837	0.326147	0.308013	0.0806805	0.111087	0.284662	0.455471	0.196756	0.513604
ENSMUSG00000025225	MGI:1099800	Nfkb2	0.000308114	0.00353844	0.247037	0.689847	0.871173	0.690711	1.09705	0.702084	0.781695	0.473855
ENSMUSG00000029371	MGI:1096868	Cxcl5	0.000311188	0.00355504	1.51719	2.29028	2.67468	2.7588	3.39106	2.31289	2.79044	2.08266
ENSMUSG00000027381	MGI:1197519	Bcl2l11	0.000318449	0.00358174	-0.597872	0.0198619	0.289939	0.391172	1.04477	-0.690807	0.307285	-0.015737
ENSMUSG00000022864	MGI:1196400	D16Ertd472e	0.000316327	0.00358174	0.792057	0.5173	1.26227	1.04248	0.85587	0.691277	0.759693	0.852734
ENSMUSG00000006445	MGI:95278	Epha2	0.000317917	0.00358174	0.0763498	0.293596	0.407392	0.444309	0.82842	0.428663	0.526068	0.630042
ENSMUSG00000075588	MGI:96183	Hoxb2	0.000321575	0.00359834	0.669888	0.0551131	0.114583	0.180657	-0.0146172	0.993909	0.160177	0.301584
ENSMUSG00000024014	MGI:97584	Pim1	0.000324207	0.00360928	0.206236	0.504422	0.341533	0.705061	0.851353	0.303099	0.274811	0.381673
ENSMUSG00000029379	MGI:3037818	Cxcl3	0.000326746	0.00361908	1.18798	2.16335	2.01281	1.95921	2.54239	1.2425	2.20091	2.40766
ENSMUSG00000063888	MGI:1913479	Rpl7l1	0.00033706	0.00371447	0.222409	0.194954	-0.0358669	0.109575	0.0676876	0.567617	0.124686	-0.00925997
ENSMUSG00000031770	MGI:1927406	Herpud1	0.000348036	0.00379707	4.34748	3.9557	4.23167	4.70113	4.09692	4.57726	4.43356	4.15579
ENSMUSG00000025383	MGI:1932410	Il23a	0.000347975	0.00379707	0.0533405	1.28114	0.372201	1.14433	2.29662	0.115618	2.42597	1.04232
ENSMUSG00000022110	MGI:1306775	Sucla2	0.000351842	0.00381949	0.466723	0.170547	-0.14496	0.0338256	0.227868	0.550767	0.0662868	-0.0499295
ENSMUSG00000018920	MGI:1932682	Cxcl16	0.000361528	0.00390522	0.79473	1.09187	1.47506	1.90014	1.96841	1.11985	1.92976	1.35672
ENSMUSG00000052837	MGI:96647	Junb	0.000364099	0.00391362	0.476845	0.44925	0.342515	0.745433	1.29237	0.835429	0.865877	0.392105
ENSMUSG00000053175	MGI:88140	Bcl3	0.000366208	0.00391699	0.345501	0.936463	1.65448	1.0578	1.10518	0.777997	1.86753	0.988565
ENSMUSG00000042305	MGI:1914729	Tmem183a	0.00037475	0.00398881	0.569901	0.293729	0.00227988	0.195419	0.149253	0.465183	0.202324	-0.0233675
ENSMUSG00000025340	MGI:1929459	Rabgef1	0.000378859	0.00401121	0.175725	0.1394	0.196404	0.387544	0.584089	0.663985	0.31976	0.138192
ENSMUSG00000049580	MGI:2443855	Tsku	0.000380532	0.00401121	0.0476202	-0.239572	0.163279	0.177163	0.514118	-0.276168	0.0795784	0.438226
ENSMUSG00000019997	MGI:95537	Ctgf	0.000389027	0.00404437	0.216709	0.0798702	0.0657752	0.103797	0.448668	0.359413	0.0988856	0.0284536
ENSMUSG00000035105	MGI:1932288	Egln3	0.000385863	0.00404437	0.243229	0.21163	-0.0664377	0.0466977	0.499165	-0.111305	0.279538	0.0717179
ENSMUSG00000044646	MGI:2443302	Zbtb7c	0.000389238	0.00404437	-0.376013	0.179937	0.448625	0.453607	0.521951	-0.460933	0.39962	0.61753
ENSMUSG00000014599	MGI:1339753	Csf1	0.000402578	0.00416315	0.0990321	0.0898986	0.47256	0.498939	0.556564	0.173449	0.536492	0.279932
ENSMUSG00000021203	MGI:1915399	Otub2	0.000406818	0.00418716	1.05587	1.16059	1.17856	1.33689	1.83368	0.882713	1.59213	1.52209
ENSMUSG00000033377	MGI:2148896	Palmd	0.000432341	0.00442896	-0.641718	-0.398018	-0.184147	0.203036	0.56784	-1.41204	1.22249	0.576067
ENSMUSG00000020048	MGI:98817	Hsp90b1	0.00044933	0.00456018	1.66662	1.79545	1.48595	1.95675	1.68697	2.23368	1.71453	1.51059
ENSMUSG00000062270	MGI:1096551	Morf4l1	0.000448036	0.00456018	0.490509	0.364975	0.0723445	0.290981	0.255507	0.566876	0.19499	0.051495
ENSMUSG00000020629	MGI:2144929	Adi1	0.000460903	0.0046484	0.549066	0.477167	0.168419	0.71486	0.648128	0.656628	-0.24579	-0.177618
ENSMUSG00000021192	MGI:1351475	Golga5	0.000464386	0.0046484	0.322719	0.254999	0.435436	0.558433	0.41744	0.374382	0.431094	0.361503
ENSMUSG00000066829	MGI:2384563	Zfp810	0.000464414	0.0046484	0.329075	0.0884019	0.311916	0.0899386	0.745642	-0.337588	0.268006	0.446421
ENSMUSG00000032424	MGI:1919905	Snhg5	0.000471939	0.00470215	2.12072	1.74538	1.69291	1.68966	1.53686	2.56943	1.71036	0.700836
ENSMUSG00000023952	MGI:1860138	Gtpbp2	0.000481421	0.00477483	0.729073	0.689557	0.247904	0.951635	1.01983	0.828327	1.11231	0.844405
ENSMUSG00000058022	MGI:1924596	Adtrp	0.000484523	0.00478385	-0.300766	1.094	1.47775	1.37449	1.87698	-0.700981	1.22797	0.262457
ENSMUSG00000037762	MGI:1914109	Slc16a9	0.00049258	0.00484148	-0.0507281	1.19544	1.0742	0.726687	0.919131	-0.398819	0.826976	0.628731
ENSMUSG00000053091	MGI:1919885	Lins	0.000501294	0.00488314	0.795719	0.749769	0.554591	1.11052	0.54543	0.951554	0.866647	0.861453
ENSMUSG00000027248	MGI:95834	Pdia3	0.000499154	0.00488314	1.02379	1.09767	0.596323	0.929455	0.931155	1.32137	0.853203	0.777005
ENSMUSG00000042182	MGI:2444572	Bend6	0.000503681	0.00488459	0.26208	0.224909	-0.2114	0.378723	0.227078	0.781721	0.258742	0.273299
ENSMUSG00000057069	MGI:1914725	Ero1lb	0.000513264	0.0049555	1.93952	2.22125	1.6222	2.24381	1.8459	2.18426	2.18766	2.38716
ENSMUSG00000027122	MGI:1926020	Arl14ep	0.000518746	0.00498636	1.34472	1.15739	1.05854	1.59012	1.172	1.38836	1.22295	1.08988
ENSMUSG00000027384	MGI:1916737	Ndufaf5	0.000533099	0.00510185	0.591979	0.464959	-0.113141	-0.100948	0.147512	0.840408	-0.146624	-0.09033
ENSMUSG00000019970	MGI:1340062	Sgk1	0.000543625	0.00517987	0.509153	0.45503	0.503682	0.916872	1.15733	0.972379	0.686922	0.535102
ENSMUSG00000049659	MGI:1923012	Aftph	0.000551729	0.00523423	0.757565	0.614229	0.490817	0.777492	0.607776	0.871539	0.360164	0.552249
ENSMUSG00000029378	MGI:88068	Areg	0.000556295	0.0052547	0.71736	1.05653	0.669758	0.685743	2.03122	2.03433	0.943345	1.09794
ENSMUSG00000027961	MGI:1924557	Lrrc39	0.000580987	0.00546428	1.0916	0.730103	0.663304	0.814906	0.740226	-0.386289	0.153272	-0.0170377
ENSMUSG00000022114	MGI:1345138	Spry2	0.000609159	0.00570465	0.4581	0.359565	0.316661	0.575043	0.702616	1.10678	0.238833	0.37028
ENSMUSG00000021270	MGI:96250	Hsp90aa1	0.000612469	0.00571115	0.416543	0.37461	0.153109	0.403981	0.415918	0.514602	0.208605	0.206613
ENSMUSG00000055991	MGI:107533	Zkscan5	0.000622702	0.00578185	0.139877	0.290632	0.527293	0.284141	0.715628	0.682076	0.466312	0.368661
ENSMUSG00000051499	MGI:3026883	Zfp786	0.000637826	0.00589719	0.685043	1.24401	1.13171	0.484447	0.411054	0.472122	0.35727	0.89092
ENSMUSG00000020669	MGI:1346118	Sh3yl1	0.000642913	0.00591914	0.189443	0.225566	0.0135494	0.433507	-0.0600819	0.901319	0.234801	-0.132483
ENSMUSG00000073856	MGI:3612188	Iqck	0.000666761	0.00606197	0.737698	0.410119	0.129106	0.30518	-0.304744	1.39775	0.404677	-0.619934
ENSMUSG00000019710	MGI:1914957	Mrpl24	0.000661808	0.00606197	0.395462	0.0226171	-0.264577	-0.0824646	0.175339	0.700584	0.0965077	-0.241189
ENSMUSG00000022346	MGI:97250	Myc	0.000664986	0.00606197	1.1671	1.06828	1.31219	1.54531	1.71852	1.39683	1.49411	1.19031
ENSMUSG00000036390	MGI:107799	Gadd45a	0.000676124	0.00612159	3.63413	2.85916	2.90021	3.67771	4.15126	3.87455	3.93233	2.88447
ENSMUSG00000020679	MGI:98505	Hnf1b	0.000682094	0.00615012	0.0760198	-0.216751	0.254637	-0.633595	0.315642	-1.17368	0.496113	-0.202344
ENSMUSG00000030659	MGI:1858179	Nucb2	0.000701753	0.00630134	0.921014	1.27048	0.720136	0.855971	0.99726	1.37708	0.960293	0.862063
ENSMUSG00000021250	MGI:95574	Fos	0.000706585	0.00631872	0.27146	0.255567	0.0196602	0.736159	0.960392	1.02114	0.980409	0.244992
ENSMUSG00000042417	MGI:2145534	Ccno	0.000723559	0.0064441	0.183633	-0.102022	0.271004	0.219214	1.28915	1.41738	0.313619	-0.208978
ENSMUSG00000026356	MGI:2442544	Dars	0.00073649	0.0065326	0.564558	0.490484	0.20459	0.481303	0.327419	0.480223	0.292642	0.337927
ENSMUSG00000028967	MGI:1921405	Errfi1	0.000743301	0.00654786	0.336343	0.652637	0.970598	1.238	1.36461	0.870454	1.29414	0.84339
ENSMUSG00000028128	MGI:88381	F3	0.000747212	0.00654786	0.265119	0.0523654	-0.0600911	0.296376	0.860824	0.429455	0.290822	0.446922
ENSMUSG00000058799	MGI:1855693	Nap1l1	0.000744812	0.00654786	0.612117	0.479872	0.111643	0.424982	0.362877	0.658737	0.198543	0.186452
ENSMUSG00000020142	MGI:2135601	Slc1a4	0.000761076	0.00664267	0.9209	0.642033	1.08738	1.18957	1.20978	0.728549	1.18107	1.12524
ENSMUSG00000063234	MGI:1934129	Gpr84	0.00077009	0.00669457	1.41613	2.58377	0.304296	1.84397	1.93831	0.167753	1.23013	1.28983
ENSMUSG00000029176	MGI:1098673	Anapc4	0.000779133	0.0067463	0.345152	0.142979	-0.047624	0.163572	0.0870447	0.359714	0.0377398	0.0769562
ENSMUSG00000068742	MGI:1270859	Cry2	0.000794847	0.00685516	0.70164	0.729272	0.72123	0.787277	0.965109	0.515489	0.373597	0.758243
ENSMUSG00000042659	MGI:1913662	Arrdc4	0.00083708	0.00708329	0.669706	0.829377	0.721985	0.836093	1.08134	1.24735	0.738792	1.01182
ENSMUSG00000034083	MGI:2444652	C130022K22Rik	0.000832188	0.00708329	1.12093	1.15993	0.710218	1.24177	1.06638	1.6786	1.01052	0.866052
ENSMUSG00000056216	MGI:104982	Cebpg	0.000827232	0.00708329	1.52546	1.05972	1.02673	1.42858	1.28344	1.24264	1.32073	1.04378
ENSMUSG00000036223	MGI:1913718	Ska1	0.000837529	0.00708329	0.53797	0.579624	0.294068	0.673998	0.366487	1.08066	0.203681	0.126513
ENSMUSG00000068580	MGI:1919258	Zfyve19	0.000836232	0.00708329	-0.0334431	0.0587665	0.0276912	-0.265522	0.134432	0.731819	0.27393	0.212388
ENSMUSG00000041396	MGI:1917212	Mettl18	0.000852238	0.00716481	0.630704	0.581506	0.142504	0.689235	0.125753	1.18142	0.322274	0.395227
ENSMUSG00000031357	MGI:1914293	Syap1	0.000853735	0.00716481	0.507406	0.366704	0.0942475	0.501874	0.219326	0.367099	0.0184976	0.23167
ENSMUSG00000001017	MGI:1913761	Chtop	0.000865466	0.00716662	0.405912	0.316729	0.103371	0.246847	0.28167	0.55639	0.245725	0.0381182
ENSMUSG00000025200	MGI:1919752	Cwf19l1	0.000867089	0.00716662	0.160451	0.306871	0.272237	0.37244	0.508069	0.492203	0.552409	0.169897
ENSMUSG00000042354	MGI:1353651	Gnl3	0.000865854	0.00716662	0.81328	0.728373	0.490725	0.764635	0.730422	0.921555	0.806525	0.573345
ENSMUSG00000090430	MGI:4937091	Snhg4	0.000864087	0.00716662	0.700633	0.163691	-0.31279	0.0253217	-0.0483362	0.40682	0.287271	0.0333295
ENSMUSG00000020076	MGI:2182303	Ddx50	0.000871604	0.00717675	1.16522	1.16079	0.758316	1.10721	0.974503	1.39045	0.929808	1.09642
ENSMUSG00000028195	MGI:88613	Cyr61	0.000876996	0.007194	0.397545	0.182953	0.152156	0.248381	0.491269	0.445107	0.341189	0.198581
ENSMUSG00000020182	MGI:94876	Ddc	0.000889811	0.00727179	0.56657	0.159933	-0.22228	-0.159512	0.909963	0.695452	0.136121	0.0284352
ENSMUSG00000064145	MGI:1344361	Arih2	0.000909482	0.00734313	0.272671	0.129327	0.116931	0.276174	0.247625	0.378203	0.249811	0.100799
ENSMUSG00000002297	MGI:1351328	Dbf4	0.000915367	0.00734313	0.606559	0.287048	0.236618	0.550944	0.334817	0.650682	0.350988	0.235222
ENSMUSG00000009092	MGI:1917627	Derl3	0.000908231	0.00734313	2.74771	3.6825	3.72865	3.80948	4.19657	4.54127	4.53409	3.99108
ENSMUSG00000020171	MGI:1927224	Yeats4	0.00091489	0.00734313	0.324668	0.350515	-0.04736	0.142145	0.228159	0.572075	0.024893	-0.21256
ENSMUSG00000028807	MGI:1920930	Zbtb8a	0.000902567	0.00734313	-0.46153	0.688775	-0.16425	0.193177	-0.413248	0.396428	-0.148062	0.28824
ENSMUSG00000026360	MGI:1098271	Rgs2	0.000949709	0.00759071	0.860111	0.482085	0.168897	0.170173	-0.150341	0.125278	0.128287	-0.499544
ENSMUSG00000020530	MGI:2387356	Ggnbp2	0.000972928	0.00773244	0.758509	0.775578	0.516337	0.651141	0.546508	0.940499	0.556493	0.4418
ENSMUSG00000062168	MGI:1097157	Ppef1	0.000974528	0.00773244	-0.140419	0.677943	0.277346	0.168351	0.403243	0.0785178	1.41199	0.0862319
ENSMUSG00000026068	MGI:1338888	Il18rap	0.000987355	0.00780583	0.172551	0.55153	0.564824	0.655107	0.814955	0.358013	0.426505	0.517172
ENSMUSG00000054766	MGI:1860267	Set	0.00100494	0.00791614	0.592935	0.370555	0.0788543	0.347409	0.23919	0.663672	0.212466	0.168095
ENSMUSG00000022685	MGI:1921358	Parn	0.00102038	0.00799218	0.0327018	0.271975	0.0921359	0.244306	-0.082352	0.571993	0.175732	0.148355
ENSMUSG00000034800	MGI:1919430	Zfp661	0.00102191	0.00799218	-0.00503682	0.136359	0.165182	0.338825	-0.000304125	0.0736703	0.960917	-0.0380679
ENSMUSG00000018648	MGI:1927168	Dusp14	0.00102929	0.00802114	0.111165	0.272492	0.209953	0.0721952	0.642714	0.991202	0.468765	0.615542
ENSMUSG00000072774	MGI:2441896	Zfp951	0.00104669	0.00812766	0.647274	0.819504	0.518356	0.0157701	0.584166	-0.427995	1.02915	1.40002
ENSMUSG00000021149	MGI:1916487	Gtpbp4	0.00105413	0.00815646	0.805117	0.706516	0.413502	0.810399	0.817177	1.02401	0.655305	0.391762
ENSMUSG00000030423	MGI:1913411	Pop4	0.00107049	0.00825371	0.381265	-0.0441695	-0.0454114	-0.0922315	-0.0136984	0.674822	0.341015	-0.0630258
ENSMUSG00000062421	MGI:99595	Arf2	0.00110963	0.0083671	0.444201	0.587439	0.274095	0.425919	0.765704	0.977685	0.659734	0.333707
ENSMUSG00000039989	MGI:1195985	Cbx4	0.0011118	0.0083671	0.175818	0.52301	0.0656268	0.115939	0.653586	0.491345	0.242899	0.174437
ENSMUSG00000019960	MGI:1914853	Dusp6	0.00111133	0.0083671	0.235051	0.0203495	0.273703	0.248285	0.507937	0.301832	0.386621	0.255306
ENSMUSG00000043631	MGI:3039578	Ecm2	0.00110339	0.0083671	1.26843	-0.390232	-0.18274	0.11943	0.445006	-0.265061	0.406643	-0.297476
ENSMUSG00000040111	MGI:1925037	Gramd1b	0.00110861	0.0083671	-0.051123	0.173559	0.21352	0.426989	1.26785	-0.106166	0.635597	0.282666
ENSMUSG00000005951	MGI:1921887	Shpk	0.00109479	0.0083671	0.377443	0.768035	0.472807	0.406215	0.394606	0.418424	-0.0989308	0.417552
ENSMUSG00000024924	MGI:98935	Vldlr	0.00111203	0.0083671	1.04635	0.638925	1.09512	1.4297	1.35014	0.51895	1.30772	0.881835
ENSMUSG00000035601	MGI:1917184	Rg9mtd3	0.00114245	0.00856643	0.280822	0.462923	0.507378	0.344128	0.220519	1.15594	0.341836	0.717697
ENSMUSG00000046676	MGI:1920980	Lce1l	0.00115707	0.00858751	0.28269	1.21069	0.0522002	0.00414295	0.315642	1.48564	0.449769	0.413047
ENSMUSG00000040128	MGI:1917838	Pnrc1	0.00115458	0.00858751	0.0335704	-0.248608	-0.548379	-0.336938	0.53329	-0.0255521	0.0706365	0.0381875
ENSMUSG00000029409	MGI:1930915	U90926	0.00115339	0.00858751	-0.916668	-0.944766	-1.19175	-0.848619	1.64939	0.208392	-0.44059	-0.284608
ENSMUSG00000070972	MGI:1919679	Dnajc25	0.00118157	0.00873959	0.446865	0.561979	0.110201	0.298914	0.504463	0.597659	0.457858	0.203798
ENSMUSG00000048922	MGI:1919787	Cdca2	0.0011949	0.00878324	0.249115	0.158584	0.0950511	0.473424	0.29484	0.678832	0.208146	0.136912
ENSMUSG00000015619	MGI:95663	Gata3	0.00119552	0.00878324	0.338975	-0.0953751	0.536881	0.166747	1.41948	0.632837	0.424693	1.01131
ENSMUSG00000006386	MGI:98664	Tek	0.00120586	0.00881581	0.979449	-0.207813	0.641499	0.320852	0.0665239	-0.434311	0.0972828	0.702846
ENSMUSG00000048832	MGI:2147661	Vps37c	0.00120803	0.00881581	0.130487	0.497432	0.526648	0.444891	0.739061	0.561388	0.553632	0.618221
ENSMUSG00000028163	MGI:97312	Nfkb1	0.00127029	0.00923926	0.404218	0.675696	1.04564	1.01509	0.95634	0.58535	1.05916	0.550057
ENSMUSG00000034449	MGI:2652816	Dhrs11	0.00127824	0.00926618	0.85184	0.924583	1.00505	0.74251	0.798033	1.17274	1.46634	1.0768
ENSMUSG00000022206	MGI:97373	Npr3	0.00128906	0.00931364	0.0330783	-0.0301115	-0.0909629	0.323963	0.659262	-0.248909	0.0407076	0.223795
ENSMUSG00000021481	MGI:1349417	Zfp346	0.00130829	0.00942142	0.240197	0.317034	0.319655	0.0732556	0.318055	0.29636	0.372908	0.150523
ENSMUSG00000064215	MGI:1277180	Ifi27l1	0.00134157	0.00962455	0.169861	-0.00136064	-0.14749	-0.165394	1.27718	0.0896793	-0.0835508	-0.345708
ENSMUSG00000071172	MGI:98285	Srsf3	0.00134532	0.00962455	0.913019	0.717417	0.421258	0.801852	0.634342	0.907318	0.509365	0.35297
ENSMUSG00000037408	MGI:2151060	Cnnm4	0.00135559	0.00966634	-0.329043	-0.155259	-0.189258	0.112084	0.542156	-0.403394	-0.154413	0.0129505
ENSMUSG00000058447	MGI:1890753	Zfp82	0.00136082	0.00967203	0.331971	0.654001	0.482686	0.420013	-0.0208575	0.918913	0.765293	0.755431
ENSMUSG00000037126	MGI:1920978	Psd	0.00137681	0.00975391	0.0250146	0.346138	0.55936	0.639855	0.13027	0.241471	0.401315	-0.0194214
ENSMUSG00000071359	MGI:1339946	Tbpl1	0.00138369	0.00977093	0.964271	0.719581	0.28242	0.687767	0.121508	0.697705	0.767756	0.659366
ENSMUSG00000021537	MGI:1097706	Cetn3	0.00140381	0.00981765	0.873676	0.389258	-0.0639459	0.291215	0.442057	0.620021	0.316567	0.012758
ENSMUSG00000028179	MGI:1339968	Cth	0.00139907	0.00981765	1.25736	0.823891	0.83302	1.34958	1.51467	1.18367	1.40704	0.967917
ENSMUSG00000045624	MGI:1913830	Esf1	0.00139988	0.00981765	0.78244	0.857869	0.32677	0.785153	0.838234	0.878327	0.445439	0.467159
ENSMUSG00000051978	MGI:3588201	Erich1	0.0014159	0.0098407	0.328277	0.607989	-0.0123547	0.226141	0.11508	1.07714	0.0273718	-0.0472592
ENSMUSG00000053334	MGI:1098550	Ficd	0.00141612	0.0098407	0.448499	0.788911	0.801535	0.786317	0.716566	0.80208	0.42236	0.607868
ENSMUSG00000020205	MGI:1096880	Phlda1	0.00142133	0.00984552	0.445994	0.639599	0.377444	0.623479	0.897659	0.968749	0.876471	0.49448
ENSMUSG00000036934	MGI:1913964	4921524J17Rik	0.00144579	0.00995179	1.05544	0.683543	0.392714	0.827342	0.502089	1.01361	0.561627	0.311708
ENSMUSG00000030386	MGI:1914620	Zfp606	0.00144176	0.00995179	0.608914	0.240647	-0.215813	0.192056	0.190825	0.530492	-0.0835771	0.499484
ENSMUSG00000064246	MGI:1340899	Chi3l1	0.00147693	0.0101128	-0.151496	-0.653473	0.0215291	0.465148	1.10104	0.551938	0.170955	0.525243
ENSMUSG00000053985	MGI:99160	Zfp14	0.00148252	0.0101128	-0.205836	0.637218	0.112468	-0.03647	-0.827728	-0.284357	0.468253	0.548467
ENSMUSG00000022313	MGI:1925831	Utp23	0.00148309	0.0101128	0.301071	0.0498922	0.0208426	0.315966	0.109934	0.567742	0.0688704	-0.313287
ENSMUSG00000029771	MGI:1350924	Irf5	0.00149517	0.0101634	0.0743037	0.435793	0.950816	0.545041	0.873401	0.684573	1.08078	0.766963
ENSMUSG00000022339	MGI:1859920	Ebag9	0.00150089	0.0101706	0.445353	0.693312	0.0605925	0.308511	0.0889971	1.17758	0.519251	0.125932
ENSMUSG00000022635	MGI:1914447	Zcrb1	0.00150919	0.0101952	0.760778	0.561854	-0.181452	0.0754745	0.464001	0.89816	0.0796628	0.047738
ENSMUSG00000023846	MGI:1914295	Riok2	0.00151645	0.0102127	0.653281	0.657579	0.425451	0.7516	0.738701	0.741325	0.547461	0.371413
ENSMUSG00000029014	MGI:99470	Dnajc2	0.00153042	0.010275	0.852313	0.569622	0.117597	0.453519	0.63637	0.884204	0.354037	0.216437
ENSMUSG00000037337	MGI:1346882	Map4k1	0.00154511	0.0103158	0.574806	-0.289406	-0.608683	-0.300294	0.738096	0.150526	-0.531419	0.213902
ENSMUSG00000024056	MGI:1914302	Ndc80	0.00155324	0.0103158	0.606095	0.309318	0.0216382	0.401247	0.629837	0.782136	0.181948	0.154639
ENSMUSG00000025592	MGI:1890446	Dach2	0.00155422	0.0103158	0.704407	0.480814	-0.0609628	0.720917	1.26665	0.583798	-0.423755	-0.244158
ENSMUSG00000073489	MGI:96429	Ifi204	0.00155541	0.0103158	1.07031	0.325559	0.66095	0.567754	0.773797	0.590276	1.43267	-0.0590292
ENSMUSG00000024778	MGI:95484	Fas	0.00158022	0.0104332	1.01467	1.21077	1.20114	1.44138	1.47459	1.3958	1.46928	0.449686
ENSMUSG00000060121	MGI:1913853	Sip1	0.00158691	0.0104332	0.908474	0.499425	0.34549	0.437985	0.0887904	1.30322	0.194692	0.139907
ENSMUSG00000033773	MGI:2141142	Rpap2	0.00158746	0.0104332	0.884089	0.565053	0.241081	0.32863	0.316836	0.596566	0.497263	0.366154
ENSMUSG00000037938	MGI:1913420	Chchd5	0.00159508	0.0104344	0.153466	0.286114	-0.0915353	-0.168608	-0.115469	0.968448	-0.157717	-0.0535176
ENSMUSG00000014226	MGI:1270839	Cacybp	0.0015972	0.0104344	0.521681	0.383596	-0.0732391	0.241561	0.239466	0.499515	0.0867896	0.0357185
ENSMUSG00000032315	MGI:88588	Cyp1a1	0.00160715	0.010468	0.715628	0.177728	-0.119957	-0.105288	0.485413	1.11816	0.415724	1.51519
ENSMUSG00000039474	MGI:1328355	Wfs1	0.0016399	0.0106496	0.0770394	0.315191	0.0856954	0.199881	0.764097	0.130593	0.429499	0.458671
ENSMUSG00000052726	MGI:3036273	Kcnt2	0.00167454	0.0108423	0.0856241	0.986546	0.631618	0.648538	0.811202	0.31554	0.969908	1.17137
ENSMUSG00000021281	MGI:104960	Tnfaip2	0.00168328	0.0108666	0.235703	0.176391	0.540324	0.369665	0.664321	0.162241	0.503108	0.653306
ENSMUSG00000001627	MGI:1316717	Ifrd1	0.00169413	0.0109044	1.30916	1.18878	0.793308	1.3847	1.65044	1.55866	1.3411	0.957695
ENSMUSG00000020250	MGI:1354175	Txnrd1	0.00173051	0.0111058	-0.109347	0.274019	0.119837	0.169931	0.20203	0.141591	0.518595	0.131851
ENSMUSG00000052631	MGI:1918380	Sh2d6	0.0017408	0.0111391	1.41564	0.743614	1.10301	1.86654	1.59123	1.01432	1.94106	0.795654
ENSMUSG00000051727	MGI:1289222	Kctd14	0.00174981	0.011164	0.525809	0.990279	0.354443	1.85863	0.792639	0.317086	0.345391	0.765095
ENSMUSG00000028970	MGI:97568	Abcb1b	0.00181671	0.011557	0.187093	0.617101	0.499321	0.956946	0.774877	0.294008	0.978391	0.102546
ENSMUSG00000039983	MGI:2685477	Ccdc32	0.00182907	0.011583	0.171951	0.0393848	0.0532253	0.118472	-0.045841	0.597567	-0.206841	-0.0140537
ENSMUSG00000054568	MGI:107699	Dub1	0.00183141	0.011583	-0.096274	0.64164	1.85725	0.464624	1.42466	0.400478	0.256621	0.114027
ENSMUSG00000028539	MGI:1333791	Artn	0.00184899	0.0116527	1.09781	0.747025	0.335371	0.599844	1.44936	0.788927	1.39906	0.278959
ENSMUSG00000072566	No associated gene	Pvt1	0.00185401	0.0116527	1.26125	0.875826	0.677879	1.28618	0.853084	1.435	1.31343	0.616376
ENSMUSG00000028709	MGI:2140623	Mobkl2c	0.00185845	0.0116527	0.360036	0.122002	0.287254	0.264674	0.565125	0.543945	0.36003	0.173843
ENSMUSG00000031750	MGI:1923777	Il34	0.00189672	0.0118586	0.374168	0.133663	0.530416	0.333138	0.727829	-0.480986	0.512358	0.425515
ENSMUSG00000030551	MGI:1352452	Nr2f2	0.0019048	0.0118751	0.719796	0.860737	0.52203	0.576339	-0.025832	0.630284	0.236652	0.387719
ENSMUSG00000034248	MGI:1914962	Slc25a37	0.00194068	0.0120643	-0.0571647	0.0272015	0.129965	0.181813	0.424237	-0.047863	0.234198	0.199712
ENSMUSG00000063145	MGI:1919819	Bbs5	0.00195198	0.0121001	0.476727	0.917676	-0.00679412	0.265478	0.519205	0.865284	0.404562	0.445249
ENSMUSG00000078773	MGI:3605986	Rad54b	0.00199392	0.0123251	0.0144017	0.864908	0.126984	0.289309	0.525923	0.311976	0.257312	0.156147
ENSMUSG00000066892	MGI:1354738	Fbxl12	0.0020164	0.0124288	0.613017	0.737041	0.894005	0.523448	1.03242	0.630652	0.853231	0.837303
ENSMUSG00000029469	MGI:1098597	Ift81	0.00203592	0.0125138	0.337902	0.37399	0.192534	0.434749	0.179637	0.585334	0.238055	0.256779
ENSMUSG00000052276	MGI:2677164	Ostn	0.00207086	0.0126928	-0.21881	0.851631	0.178331	-0.223859	1.65986	-0.352754	0.155088	0.172818
ENSMUSG00000031577	MGI:2384576	BC019943	0.0021009	0.0128408	0.666262	0.424072	0.395028	0.503961	0.704653	0.580718	0.644165	0.347105
ENSMUSG00000057367	MGI:1197009	Birc2	0.00213957	0.0130406	0.954386	0.997506	0.844927	1.05431	0.680729	0.875738	0.958804	0.599085
ENSMUSG00000038151	MGI:99655	Prdm1	0.00215848	0.0131192	-0.0102786	1.0322	1.13621	1.14525	1.3321	0.795669	1.27726	0.871613
ENSMUSG00000020982	MGI:1918305	Nemf	0.00219849	0.0132738	0.512265	0.491444	0.144841	0.473223	0.335607	0.634309	0.466765	0.289005
ENSMUSG00000026317	MGI:1349447	Cln8	0.00219945	0.0132738	0.272114	0.466567	0.292264	0.488722	0.55189	0.530551	0.379248	0.277673
ENSMUSG00000029328	MGI:1355299	Hnrpdl	0.00220216	0.0132738	0.746656	0.659401	0.336137	0.631186	0.452955	0.792967	0.832937	0.553648
ENSMUSG00000040429	MGI:1918240	Mterf	0.0022273	0.0133884	1.15533	1.05694	0.152247	0.576846	0.670227	1.10123	1.00182	0.340495
ENSMUSG00000054951	MGI:1918833	9130008F23Rik	0.00225412	0.0134925	0.635134	0.833118	0.683235	0.891102	0.95903	1.37537	1.00452	0.892263
ENSMUSG00000036009	MGI:3041259	BC067068	0.002257	0.0134925	1.37262	0.740542	0.445672	0.438647	0.646416	0.841061	0.645341	0.195418
ENSMUSG00000026656	MGI:95499	Fcgr2b	0.00230724	0.0137552	0	0.795657	-0.131733	0.00100935	0.157937	-0.31982	1.47425	0.400746
ENSMUSG00000031488	MGI:1923017	Rab11fip1	0.0023258	0.0138281	0.35274	0.605482	0.910296	1.2044	0.718349	-0.476603	1.08924	0.567363
ENSMUSG00000052656	MGI:109483	Rnf103	0.0023462	0.0139069	0.432067	0.621673	-0.0288338	0.324621	0.471608	0.68427	0.213545	0.210881
ENSMUSG00000003545	MGI:95575	Fosb	0.00235416	0.0139069	0.308096	0.531904	0.308413	0.793636	1.0523	0.300738	0.634132	0.808178
ENSMUSG00000036534	MGI:2679005	Slc38a7	0.00235927	0.0139069	0.337219	0.282329	0.432097	0.154785	-0.254929	0.277053	0.436517	-0.0269022
ENSMUSG00000028121	MGI:1352501	Bcar3	0.00236917	0.0139069	-0.110062	-0.0840368	0.0417558	-0.10643	0.470026	0.103007	0.11576	0.243894
ENSMUSG00000020363	MGI:1338883	Gfpt2	0.0023743	0.0139069	0.0230834	0.212611	0.246154	0.296163	0.751927	0.222279	0.392366	0.291839
ENSMUSG00000025024	MGI:1923729	Smndc1	0.0023773	0.0139069	1.04565	0.848386	0.620499	0.791962	0.975874	0.999467	0.954861	0.561536
ENSMUSG00000003559	MGI:1929882	As3mt	0.00244256	0.0142504	-0.0930198	-0.160007	0.0802684	-0.253246	0.0206014	0.658304	-0.00834374	-0.0730251
ENSMUSG00000021377	MGI:1926209	Dek	0.00245265	0.0142712	0.768677	0.548449	0.163838	0.573694	0.362564	0.561463	0.266339	0.263736
ENSMUSG00000049305	MGI:1919704	Ccdc71	0.00246838	0.0142882	-0.027569	0.111628	0.0229875	0.129848	0.337223	0.421927	0.215899	0.0387073
ENSMUSG00000022323	MGI:1095401	Hrsp12	0.00246868	0.0142882	0.696139	-0.0670123	-0.243654	-0.401867	0.0512825	0.358824	-0.285897	0.0554137
ENSMUSG00000040586	MGI:1350328	Ofd1	0.00253559	0.0145808	0.853856	0.428172	0.370014	0.664376	0.533832	0.714361	0.448317	0.349316
ENSMUSG00000026083	MGI:2441772	Eif5b	0.0025358	0.0145808	0.617548	0.428095	0.07354	0.295822	0.373228	0.700158	0.209571	0.062334
ENSMUSG00000078994	MGI:1920057	Zfp429	0.0025397	0.0145808	-0.344013	0.691091	0.693391	0.666424	1.27098	0.769488	1.17289	1.53034
ENSMUSG00000044231	MGI:2145264	Nhlrc1	0.00255184	0.0145808	-0.102276	0.0788981	-0.020745	-0.0181538	0.378714	0.800929	-0.17074	-0.288825
ENSMUSG00000024587	MGI:1917473	Nars	0.002556	0.0145808	0.690705	0.573642	0.510129	0.595885	0.830857	0.783846	0.569988	0.412443
ENSMUSG00000042472	MGI:1289280	Zfp410	0.00255933	0.0145808	0.754769	0.648462	0.615734	0.469632	0.514326	0.783644	0.619091	0.222176
ENSMUSG00000053289	MGI:1924841	Ddx10	0.00266292	0.0151202	0.83535	0.818962	0.472425	0.652633	0.727307	0.968431	0.582352	0.471046
ENSMUSG00000063506	MGI:2443418	Arhgap22	0.00267322	0.0151202	0.479073	0.260397	0.420731	0.370849	1.12693	-0.125376	0.637628	0.122975
ENSMUSG00000004446	MGI:108093	Bid	0.0026748	0.0151202	-0.131427	0.354341	0.535127	0.116603	0.303278	0.12638	0.376588	0.135187
ENSMUSG00000022769	MGI:2149842	Sdf2l1	0.00269471	0.0151934	2.81012	3.53235	2.88487	2.90693	3.01348	3.74411	3.26835	2.69265
ENSMUSG00000004535	MGI:1289308	Tax1bp1	0.00272542	0.0152883	0.419587	0.277358	0.105988	0.350502	0.320201	0.337655	0.264368	0.196071
ENSMUSG00000066637	MGI:1922766	Ttc32	0.00272554	0.0152883	0.0981652	-0.323379	0.257258	0.323775	0.252395	-0.0126334	0.71593	0.640586
ENSMUSG00000027832	MGI:104641	Ptx3	0.00278158	0.015558	1.53831	1.79089	1.52413	1.66773	1.41714	1.61399	1.96074	0.939162
ENSMUSG00000039742	MGI:3032524	Fam71f1	0.00278789	0.015558	0.307806	0.294906	0.351915	0.50003	0.795655	1.9767	-0.107706	1.29417
ENSMUSG00000029859	MGI:107381	Epha1	0.0028134	0.0156276	-0.0285404	0.0314399	0.167214	0.178485	0.407661	0.331715	0.128855	-0.0757986
ENSMUSG00000028542	MGI:95760	Slc6a9	0.00281827	0.0156276	1.01636	0.638258	1.03132	1.31076	1.217	0.486522	1.35076	1.03209
ENSMUSG00000025878	MGI:103185	Uimc1	0.00282898	0.0156276	0.444867	0.23037	0.0368164	0.0560592	0.171935	0.450023	0.232634	0.199191
ENSMUSG00000030188	MGI:1913691	Magohb	0.00282901	0.0156276	0.654424	0.259721	-0.206409	0.0885567	0.171045	0.968366	0.203205	0.0663661
ENSMUSG00000031257	MGI:2450016	Nox1	0.00287841	0.0158604	2.27584	1.2352	-0.270434	0.902075	1.08599	2.20964	1.19363	0.356116
ENSMUSG00000027236	MGI:1925905	Eif3j	0.00291408	0.0160164	0.727531	0.523377	0.0401384	0.517208	0.349561	0.777292	0.533624	0.325218
ENSMUSG00000026670	MGI:1334459	Uap1	0.00294112	0.0161245	0.106763	0.129538	0.174736	0.247613	0.291005	0.381655	0.352162	0.0365015
ENSMUSG00000040829	MGI:3603821	Zmynd15	0.00296181	0.0161972	0.757015	1.54057	1.60885	1.40505	1.79824	0.733867	1.46237	0.847014
ENSMUSG00000042712	MGI:109567	Wbp5	0.0030203	0.0164758	0.798218	0.562973	0.000953862	0.34945	0.203711	0.888603	0.0768458	0.128761
ENSMUSG00000027981	MGI:1914475	Rnpc3	0.00306619	0.0166844	1.07281	0.705594	0.39775	0.757315	0.657736	1.16702	0.558696	0.834569
ENSMUSG00000004730	MGI:106912	Emr1	0.00310509	0.016854	-0.298214	0.553986	-0.324519	0.72713	0.323436	-0.994725	0.841027	0.331958
ENSMUSG00000045027	MGI:1918085	Prss22	0.00314383	0.0169889	-0.0772176	8.28818e-05	0.167875	0.34093	0.0747544	1.22634	0.0474775	0.0201166
ENSMUSG00000030521	MGI:1915223	Mphosph10	0.00314552	0.0169889	0.914283	0.658517	0.428629	0.820084	0.852745	0.989419	0.539537	0.53023
ENSMUSG00000055150	MGI:107783	Zfp78	0.00316215	0.0170366	0.483028	0.411298	0.310505	0.52551	-0.213949	0.982002	0.908043	0.246519
ENSMUSG00000032478	MGI:1861676	Nme6	0.00316999	0.0170367	0.276193	0.311504	-0.0408652	0.194333	0.0831521	1.1485	0.468778	-0.121361
ENSMUSG00000031660	MGI:1349766	Brd7	0.00319681	0.0171105	0.295112	0.160527	0.112723	0.165639	0.330703	0.603226	0.10711	0.121429
ENSMUSG00000041703	MGI:1929518	Zic5	0.00320691	0.0171105	0.503881	0.437318	-0.0582849	0.874587	0.247702	1.5364	0.0872766	0.689597
ENSMUSG00000026544	MGI:1915690	Dusp23	0.00320724	0.0171105	0.815306	0.559883	0.892156	0.231092	0.22591	1.47066	1.14657	0.190803
ENSMUSG00000053600	MGI:2385049	Zfp472	0.00325973	0.0172898	0.808937	0.418037	0.449605	0.716882	0.406856	1.23595	0.410354	0.382511
ENSMUSG00000044763	MGI:1196261	Rg9mtd1	0.0032689	0.0172898	1.25053	0.976981	0.650342	1.00545	0.915418	1.46368	1.07365	0.80049
ENSMUSG00000038059	MGI:1917088	Smim3	0.00327027	0.0172898	0.873124	0.592624	0.663945	0.669087	1.09306	1.21632	0.84631	0.774635
ENSMUSG00000079303	No associated gene	Zfp131	0.00327254	0.0172898	1.48	0.942358	0.922465	1.36743	1.32035	1.40276	0.936824	1.01056
ENSMUSG00000025925	MGI:109634	Terf1	0.0032922	0.0173516	0.404433	0.170272	-0.0864978	0.615846	0.309204	0.672875	0.203625	0.0795359
ENSMUSG00000030720	MGI:107537	Cln3	0.00332991	0.0174862	-0.0265442	0.104034	0.439231	0.305124	0.593274	-0.353637	0.215775	0.300431
ENSMUSG00000025190	MGI:95791	Got1	0.00333376	0.0174862	0.752379	0.812736	0.715045	0.59659	0.983058	0.944445	0.98444	0.663207
ENSMUSG00000022338	MGI:1919286	Eny2	0.00335535	0.0175573	0.516265	0.351039	-0.14832	0.156515	0.15187	0.535805	0.248052	-0.182106
ENSMUSG00000039754	MGI:1919291	Alkbh4	0.00339065	0.0176995	0.150312	0.208075	0.145227	0.0332955	-0.110336	0.751653	0.247335	-0.279105
ENSMUSG00000021431	MGI:1915047	Snrnp48	0.00342447	0.0178334	0.848031	0.712296	0.343668	0.424711	0.665919	0.795895	0.544211	0.295064
ENSMUSG00000021385	MGI:1922928	Ippk	0.0034467	0.0179064	0.4352	0.584666	0.313874	0.50055	0.498651	0.723159	0.578741	0.483636
ENSMUSG00000021737	MGI:1913663	Psmd6	0.00346173	0.0179418	0.465016	0.244191	-0.166343	0.0198813	0.168619	0.583553	-0.0400519	-0.0811627
ENSMUSG00000034442	MGI:1923607	Trmt5	0.00351295	0.0181641	0.442935	0.246274	0.466304	0.0508301	0.411848	0.403454	0.610976	0.15292
ENSMUSG00000052031	MGI:1919786	Tagap1	0.00352259	0.0181709	0.234204	0.0883775	0.185303	0.0258043	-0.153286	0.0573091	0.519664	-0.0682195
ENSMUSG00000003923	MGI:107810	Tfam	0.00357361	0.0183828	1.05232	0.733754	0.315293	0.583624	0.841978	0.99855	0.754619	0.500487
ENSMUSG00000035004	MGI:1891393	Igsf6	0.00358052	0.0183828	0.750633	1.17358	0.279508	1.90133	0.858578	-1.60181	1.03751	1.50333
ENSMUSG00000074676	MGI:95546	Foxs1	0.00362842	0.018585	0.143624	-0.313723	-0.0921969	-0.169508	-0.372432	0.624801	-0.0815656	-0.186515
ENSMUSG00000021367	MGI:95283	Edn1	0.00366848	0.0187462	0.794444	0.532864	0.467093	0.813229	0.760704	1.29443	0.966484	0.510769
ENSMUSG00000053510	MGI:1201386	Nrd1	0.00368873	0.0187465	0.200119	0.233287	0.0883205	0.336796	0.455725	0.207751	0.177939	0.135442
ENSMUSG00000020696	MGI:1914588	Rffl	0.00369273	0.0187465	0.560906	0.318695	0.652433	0.757353	1.05809	0.0248924	0.436707	0.527642
ENSMUSG00000073478	MGI:1925971	D730003I15Rik	0.00369431	0.0187465	0.580216	0.290988	0.8259	-0.267634	0.502784	0.404373	1.44671	-0.437897
ENSMUSG00000003234	MGI:1351656	Abcf3	0.00370591	0.0187617	0.0112195	0.165992	0.0526397	0.144768	0.164775	0.475533	0.115802	0.0423992
ENSMUSG00000027620	MGI:2157953	Rbm39	0.00372532	0.0188163	1.02994	0.944163	0.716769	1.04196	1.00461	0.942684	0.962668	0.742838
ENSMUSG00000063972	MGI:1352459	Nr6a1	0.00376248	0.0189601	0.331745	0.43999	0.149371	0.907039	0.382143	-0.000905581	0.56393	0.777835
ENSMUSG00000003031	MGI:104565	Cdkn1b	0.00377724	0.0189907	0.436177	0.391442	-0.0223686	0.244709	-0.135917	0.0398731	-0.0181604	0.0949974
ENSMUSG00000028653	MGI:1914216	Trit1	0.00380516	0.019087	0.84803	0.719848	0.445382	0.486363	0.679276	0.892861	0.841948	0.319289
ENSMUSG00000024424	MGI:1919997	Ttc39c	0.00384865	0.0192532	0.478764	0.0675354	0.248377	0.58515	0.624102	0.384533	0.373046	-0.457746
ENSMUSG00000039328	MGI:1916117	Rnf122	0.00386364	0.0192532	0.554685	0.386663	0.199676	0.261955	0.806365	1.1449	0.673161	0.310253
ENSMUSG00000046667	MGI:1919647	Rbm12b	0.00386813	0.0192532	0.143041	0.563574	-0.0543065	0.270262	0.816631	0.885739	-0.173089	0.48442
ENSMUSG00000040618	MGI:1860456	Pck2	0.00388076	0.0192532	1.23676	0.491619	0.781146	1.02642	0.577902	0.544958	0.822913	0.454708
ENSMUSG00000024273	MGI:1915296	2700062C07Rik	0.00389087	0.0192532	0.765293	0.547516	0.111993	0.245512	0.708866	0.849994	0.633959	-0.0078293
ENSMUSG00000010095	MGI:96955	Slc3a2	0.00389122	0.0192532	1.28113	1.08386	1.03414	1.15707	1.30874	1.5389	1.16464	0.852948
ENSMUSG00000004460	MGI:1915088	Dnajb11	0.00392626	0.0193826	0.794234	1.02649	0.724874	0.721601	1.01326	1.28669	0.842497	0.737715
ENSMUSG00000020936	MGI:102579	Nmt1	0.00397881	0.0195977	0.152133	0.20821	0.111865	0.110076	0.276233	0.460184	0.238144	0.0821332
ENSMUSG00000038742	MGI:1917976	Angptl6	0.00401945	0.0197435	1.19301	0.891271	1.50963	0.921357	0.899356	1.79614	1.59466	-0.219742
ENSMUSG00000032422	MGI:2155664	Snx14	0.00402651	0.0197435	0.559181	0.0301881	0.0362038	0.236061	0.272036	0.413119	0.198472	0.19432
ENSMUSG00000032548	MGI:1346021	Slco2a1	0.00409158	0.0200176	-0.415917	0.039701	0.0827109	0.341819	0.647408	-0.283576	0.104603	0.198535
ENSMUSG00000021096	MGI:99878	Ppm1a	0.00415261	0.0202491	0.235362	0.189362	0.123605	0.185835	0.326196	0.331854	0.209186	0.149379
ENSMUSG00000025616	MGI:1921362	Usp16	0.00415748	0.0202491	0.52074	0.442346	0.339483	0.501553	0.35362	0.592038	0.384948	0.328138
ENSMUSG00000037465	MGI:1101353	Klf10	0.00417102	0.0202558	1.16435	0.377178	0.881717	1.45084	0.633557	1.16501	0.962958	1.29656
ENSMUSG00000015357	MGI:1346017	Clpx	0.00417741	0.0202558	0.489287	0.481036	0.168352	0.374011	0.460251	0.639358	0.220433	0.307054
ENSMUSG00000025646	MGI:1925349	Atrip	0.00419628	0.0203019	0.120128	0.292608	0.266984	0.148803	-0.076014	0.451284	0.359546	0.00809075
ENSMUSG00000035845	MGI:2385025	Alg12	0.00421368	0.0203019	0.740048	1.09165	1.33128	0.805758	0.897787	0.515563	1.2452	0.878832
ENSMUSG00000057113	MGI:106184	Npm1	0.00421484	0.0203019	0.684046	0.586108	0.162342	0.399365	0.297439	0.716285	0.354917	0.225233
ENSMUSG00000027088	MGI:1920623	Phospho2	0.00426015	0.020475	0.760856	0.363572	0.360255	0.440101	0.535294	0.799698	0.624	0.309115
ENSMUSG00000023908	MGI:2137630	Pkmyt1	0.00427749	0.0205132	-0.0656403	-0.139326	-0.204781	-0.229032	0.169542	0.535181	-0.0902603	-0.150136
ENSMUSG00000042363	MGI:1916114	Lgalsl	0.00433711	0.0207535	0.857218	0.0409348	0.475747	0.253092	-0.0543432	0.153106	0.318743	0.309202
ENSMUSG00000032586	MGI:1096377	Traip	0.00435289	0.0207834	0.0760301	0.301201	0.0482732	0.217314	-0.109249	0.539865	0.259825	0.0869292
ENSMUSG00000037958	MGI:2144305	Ccdc55	0.00436362	0.0207891	0.625537	0.452419	0.318541	0.321533	0.335356	0.831388	0.520979	0.0762142
ENSMUSG00000061731	MGI:894663	Ext1	0.00439221	0.0208394	0.130541	0.0411705	0.152066	0.204085	0.147409	0.00899793	0.378791	0.02531
ENSMUSG00000041124	MGI:1925350	Msantd4	0.00439327	0.0208394	0.390387	0.417421	0.14759	0.418417	0.241294	0.787949	0.0590504	0.309416
ENSMUSG00000019843	MGI:95602	Fyn	0.00442917	0.0209641	0.147836	0.229641	0.184831	0.250786	0.5084	0.261496	0.243684	0.201807
ENSMUSG00000019814	MGI:2447810	Ltv1	0.00446829	0.0211035	0.595731	0.647979	0.326407	0.461673	0.762259	0.981932	0.496273	0.394895
ENSMUSG00000045248	MGI:1917875	Med26	0.00450307	0.0212218	0.309313	0.508707	0.439867	0.578853	0.644416	0.641745	0.591306	0.513307
ENSMUSG00000024680	MGI:95495	Ms4a2	0.00453986	0.0213491	0.734389	0.790751	0.35503	0.438977	0.466307	-0.87687	-0.5134	-0.0769119
ENSMUSG00000030364	MGI:2136934	Clec2h	0.00458874	0.0215326	0	0.392712	1.18695	0.709948	1.00734	0.486471	-0.105136	0.827248
ENSMUSG00000018848	MGI:1914297	Rars	0.00460517	0.0215633	0.604179	0.472502	0.139829	0.406277	0.62138	0.708919	0.628254	0.30033
ENSMUSG00000053886	MGI:1919531	Sh2d4a	0.00463666	0.0216642	-0.288616	0.441675	0.355208	-0.382217	0.529232	0.467491	0.69174	0.0908733
ENSMUSG00000045576	MGI:2386964	St7l	0.00470798	0.0219505	0.376242	0.0465217	0.242398	0.0766659	0.252317	0.348844	0.369591	0.38723
ENSMUSG00000036931	MGI:3041243	Nfkbid	0.0047185	0.0219526	-0.533449	-0.172963	0.296804	0.0348572	-0.561686	0.321069	0.685376	0.309015
ENSMUSG00000027397	MGI:108392	Slc20a1	0.00474917	0.0220376	0.413205	0.570536	0.622804	0.678848	0.545313	0.646086	0.649363	0.393744
ENSMUSG00000031596	MGI:99828	Slc7a2	0.00475697	0.0220376	-0.586566	1.37666	1.28188	1.44898	1.60938	-0.111465	2.06544	2.15346
ENSMUSG00000039908	MGI:2444589	Slc26a11	0.00477131	0.0220572	0.409105	0.380709	0.690906	0.170039	0.213763	0.370027	0.454363	0.451686
ENSMUSG00000045466	MGI:2141515	Zfp956	0.00480237	0.0221539	0.277888	0.913884	0.429917	0.586708	0.500037	0.272205	0.367779	0.283823
ENSMUSG00000032575	MGI:1922090	Manf	0.00482236	0.0221991	1.40401	1.62673	1.28857	1.27966	1.63841	1.96959	1.54408	1.42202
ENSMUSG00000020656	MGI:2182540	Grhl1	0.00484201	0.0222427	0.882165	0.994109	0.79884	1.79204	1.22425	1.39996	1.16279	0.763168
ENSMUSG00000030166	MGI:101949	Rad52	0.0048825	0.0223815	1.10564	0.88232	1.38266	1.1416	1.31829	1.25135	1.39388	0.99189
ENSMUSG00000042389	MGI:2141599	Tsen2	0.00491445	0.022443	-0.0870071	0.354825	0.130625	0.0520092	-0.00198416	0.459656	0.313114	-0.041604
ENSMUSG00000057835	MGI:1345189	Zfp119a	0.00491648	0.022443	1.41281	0.364612	0.591097	0.724294	0.469771	1.29476	1.10028	0.646487
ENSMUSG00000048962	MGI:1925998	Rassf10	0.00493314	0.0224632	1.06815	-0.399163	0.892434	0.385644	0.586852	-0.224178	1.26938	1.08599
ENSMUSG00000036845	MGI:1922910	Lin37	0.00494149	0.0224632	-0.0246319	0.366892	-0.203246	-0.347537	-0.145989	0.736639	0.140522	0.189645
ENSMUSG00000055994	MGI:2429397	Nod2	0.00495519	0.0224786	0.875267	0.419059	0.805718	0.0974676	1.6169	-0.0224642	1.38129	0.391352
ENSMUSG00000070495	MGI:3652571	Ctcfl	0.00496702	0.0224856	0.903111	0.796583	0.0151888	0.644763	0.574599	1.1117	0.42552	0.400759
ENSMUSG00000057342	MGI:1861380	Sphk2	0.00498584	0.022524	0.0148294	0.267536	0.0529989	0.064156	0.474245	0.359246	0.274747	0.0324771
ENSMUSG00000004018	MGI:1914280	Fancl	0.00503106	0.0226814	0.751393	0.6352	0.11121	0.23052	0.314416	0.433937	0.533125	0.221417
ENSMUSG00000055116	MGI:1096381	Arntl	0.00505749	0.0227535	0.634114	0.552866	0.728705	0.910821	0.986845	0.887684	0.879672	0.865251
ENSMUSG00000051920	MGI:1922667	Rspo2	0.00508516	0.0227956	0.924624	0.813558	0.0678666	0.447443	0.704699	0.195187	0.748149	0.468639
ENSMUSG00000020492	MGI:1913390	Fam33a	0.00509129	0.0227956	0.324609	-0.0242983	0.0218825	0.379975	0.0635101	0.678778	0.180924	-0.308293
ENSMUSG00000004085	MGI:2443258	B230120H23Rik	0.0051065	0.0227956	0.252505	-0.00908529	0.257992	0.480382	0.534143	-0.129809	0.504669	0.351412
ENSMUSG00000021981	MGI:1914081	Cab39l	0.00510863	0.0227956	0.468971	0.312904	0.0842636	0.168046	0.115621	0.441801	0.234841	0.0530243
ENSMUSG00000027091	MGI:1919747	Zc3h15	0.0051293	0.0228411	0.661993	0.479771	0.130462	0.467379	0.457335	0.819342	0.312032	0.168161
ENSMUSG00000027804	MGI:1914988	Ppid	0.00517913	0.023016	0.688676	0.617261	0.218822	0.677957	0.542524	0.873737	0.583957	0.356299
ENSMUSG00000019948	MGI:1914269	Actr6	0.00522097	0.0231548	1.06226	0.928794	0.231003	0.795097	0.449568	0.89923	0.612937	0.481357
ENSMUSG00000021911	MGI:1347094	Parg	0.00531025	0.023503	0.356947	0.279741	0.238736	0.551442	0.188189	0.158553	0.159786	0.0612026
ENSMUSG00000030785	MGI:104649	Cox6a2	0.00532972	0.0235414	0.577416	-0.414817	0.821141	1.30938	0.668605	1.10389	1.32666	1.24518
ENSMUSG00000049047	MGI:1918953	Armcx3	0.00545698	0.0240127	0.434255	0.3797	0.139722	0.455518	0.219426	0.502526	0.166075	0.237346
ENSMUSG00000041347	MGI:88144	Bdkrb1	0.00545842	0.0240127	0.194878	0.960467	0.78077	0.81689	0.555064	0.224395	1.28401	-0.686426
ENSMUSG00000020832	MGI:1889295	Eral1	0.00549473	0.0241237	-0.0421374	0.0190501	0.144299	0.181369	0.200612	0.451413	0.385189	-0.0648009
ENSMUSG00000060519	MGI:1353652	Tor3a	0.00553086	0.0242336	0.302852	0.262146	0.491687	-0.117861	0.591248	0.154108	0.44791	0.594384
ENSMUSG00000015961	MGI:87948	Adss	0.00554242	0.0242356	0.39691	0.333909	0.0933357	0.308627	0.435555	0.406479	0.308554	0.251963
ENSMUSG00000042787	MGI:2143333	Exog	0.00557176	0.0243152	0.681264	0.63809	0.348071	0.430787	0.301968	0.976861	0.389802	0.363342
ENSMUSG00000048787	MGI:2679003	Dcun1d3	0.00560851	0.0244267	0.670857	0.768633	0.367406	0.764446	0.581146	0.76351	0.353054	0.589157
ENSMUSG00000008333	MGI:104805	Snrpb2	0.00564036	0.0245165	0.840198	0.421435	-0.175039	0.280773	0.171843	0.892939	0.141251	0.2333
ENSMUSG00000018189	MGI:1914848	Uchl5	0.00566931	0.0245933	0.541416	0.405288	0.000435169	0.190206	0.207991	0.774468	0.0681901	0.158485
ENSMUSG00000038005	MGI:1919862	2700029M09Rik	0.00572559	0.0247702	0.765431	0.22432	-0.0259498	0.442681	0.296914	0.956657	0.202498	0.18342
ENSMUSG00000041301	MGI:88388	Cftr	0.0057481	0.0247702	0.306345	1.23636	0.710798	0.692747	1.28921	-0.248148	0.618461	0.592977
ENSMUSG00000001630	MGI:1922250	Stk38l	0.00575231	0.0247702	0.243577	0.150054	0.156765	0.184956	0.417098	0.285488	0.252817	-0.0648413
ENSMUSG00000068114	MGI:1923707	Ccdc134	0.00575651	0.0247702	1.54889	1.70767	1.48758	1.39755	1.84223	2.0401	1.55806	1.25818
ENSMUSG00000046550	MGI:3605548	Spin2	0.00576686	0.0247702	-0.0498673	-0.239211	-0.0912126	-0.0302848	0.107345	1.5301	-0.662886	0.156064
ENSMUSG00000046269	MGI:1859645	Usp27x	0.00583845	0.0250285	-0.0086481	0.351425	0.793203	0.394699	1.0927	0.4083	0.777533	0.226814
ENSMUSG00000022253	MGI:1915896	Nadk2	0.00590397	0.0251634	0.653952	0.1653	0.364972	0.302429	0.241606	0.604562	0.126315	0.0374321
ENSMUSG00000026563	MGI:1196415	Tada1	0.00590911	0.0251634	0.257307	0.184129	0.0610708	-0.112163	-0.094788	0.415734	-0.0348274	0.0450318
ENSMUSG00000037313	MGI:1341163	Tacc3	0.00594195	0.0251634	0.384359	0.327766	-0.0225971	0.120116	0.270981	0.731783	0.0308438	-0.132007
ENSMUSG00000048234	MGI:2677438	Rnf149	0.00594466	0.0251634	0.404916	0.371229	0.0963054	0.271412	0.372849	0.485295	0.271011	0.13226
ENSMUSG00000028945	MGI:97912	Rheb	0.00594479	0.0251634	0.609335	0.52903	0.0847675	0.28319	0.53687	0.720077	0.389835	0.0658253
ENSMUSG00000005667	MGI:1338850	Mthfd2	0.00594562	0.0251634	1.02492	0.612316	0.693489	0.900693	0.88886	0.737967	0.706849	0.613727
ENSMUSG00000028525	MGI:99557	Pde4b	0.00595766	0.0251634	0.0686781	-0.11172	0.318136	0.991924	0.735578	-0.900069	0.672651	-0.0886514
ENSMUSG00000074971	MGI:1914856	Fibin	0.00596217	0.0251634	1.1859	1.02038	0.832353	1.05795	1.2989	1.15519	1.19123	1.07696
ENSMUSG00000031843	MGI:1915783	Mphosph6	0.00597826	0.0251825	0.414535	0.459791	0.323848	0.306119	-0.0627789	0.734825	0.531586	0.0505949
ENSMUSG00000051147	MGI:109201	Nat2	0.00609397	0.0256205	0.281049	0.174532	-0.289551	0.241233	-0.0552379	0.929565	0.189684	-0.0281637
ENSMUSG00000010554	MGI:1914743	Mettl16	0.0061322	0.0257316	0.461081	0.462313	0.241103	0.484013	0.323096	0.594904	0.18785	0.277874
ENSMUSG00000079737	MGI:1913848	3110001I22Rik	0.00615358	0.0257718	0.456194	1.06563	0.807288	0.961657	0.564091	0.732104	0.555766	0.718267
ENSMUSG00000050271	MGI:1196223	D8Ertd82e	0.00621745	0.0259894	0.679939	0.728402	1.00133	1.23411	1.59056	1.0211	1.24191	0.869975
ENSMUSG00000025264	MGI:1916749	Tsr2	0.00635281	0.0265044	0.271169	0.311345	0.0918877	0.0809401	0.282891	0.635258	0.145664	-0.0187914
ENSMUSG00000039452	MGI:2685966	Snx22	0.00638042	0.0265688	0.911915	1.04933	0.923842	1.32865	0.715601	0.824303	1.49071	1.15422
ENSMUSG00000026504	MGI:1924066	Sdccag8	0.00643626	0.0267503	0.26558	0.2694	0.117012	0.251868	0.530833	0.317888	0.0208449	-0.0622789
ENSMUSG00000030827	MGI:1861377	Fgf21	0.006467	0.026827	3.17776	2.23949	1.82576	3.26479	2.86502	2.61837	3.08074	2.82906
ENSMUSG00000021702	MGI:1101779	Thbs4	0.00651027	0.0268864	1.32722	0.847566	0.37622	1.47584	-0.304952	0.703989	-0.349372	-0.199823
ENSMUSG00000030619	MGI:95286	Eed	0.00652663	0.0268864	0.418933	0.232928	-0.114476	0.161595	0.112414	0.415359	0.275402	0.105126
ENSMUSG00000062510	MGI:2685830	Nsl1	0.00652969	0.0268864	0.345932	0.284997	0.4135	0.700818	0.15836	0.510664	0.314047	-0.176281
ENSMUSG00000038622	MGI:1917040	Med30	0.00653061	0.0268864	0.566484	0.16018	-0.368379	-0.121007	0.158601	0.664738	0.338991	0.038265
ENSMUSG00000054720	MGI:2140839	Lrrc8c	0.0065735	0.027012	-0.0815938	-0.00327146	0.0641937	0.358733	0.765562	-0.0284306	0.0908791	0.376007
ENSMUSG00000034329	MGI:2442836	Brip1	0.00659699	0.0270189	-0.0236299	0.306507	0.106926	0.366457	0.259488	0.411224	0.379942	0.896521
ENSMUSG00000028719	MGI:1913838	Cmpk1	0.00659993	0.0270189	0.80533	0.584623	0.0666812	0.374302	0.245619	0.675663	0.417567	0.158991
ENSMUSG00000032878	MGI:2445069	Ccdc85a	0.00661416	0.0270264	0.1195	0.104239	0.361644	-0.130496	0.75366	-0.12787	-0.106378	1.11965
ENSMUSG00000020151	MGI:109559	Ptprr	0.00667721	0.0271866	1.00441	0.218893	0.192356	0.224671	0.508553	-0.551532	0.150271	0.631338
ENSMUSG00000029397	MGI:1915348	Rchy1	0.00667828	0.0271866	1.01183	0.695273	0.486036	0.450429	0.306403	0.930829	0.770601	0.54629
ENSMUSG00000024360	MGI:2385071	Etf1	0.00671513	0.0272857	0.536938	0.433757	0.256804	0.523926	0.487793	0.443043	0.556457	0.318248
ENSMUSG00000027469	MGI:1919369	Tpx2	0.00674106	0.0273401	0.272267	0.245277	0.222248	0.42682	0.471879	0.576451	0.350146	0.197686
ENSMUSG00000090739	No associated gene	D930016D06Rik	0.00676565	0.0273484	0.773617	0.970011	0.708079	0.763891	0.825776	0.679288	0.232449	0.503273
ENSMUSG00000036533	MGI:2384718	Cdc42ep3	0.00679758	0.0273484	0.882372	0.762549	0.554454	0.880433	1.11012	1.02352	0.7328	0.636065
ENSMUSG00000027667	MGI:1915028	Zfp639	0.00680528	0.0273484	0.99936	0.685728	0.515533	0.642166	1.04617	1.29094	0.867726	0.669853
ENSMUSG00000029552	MGI:105081	Tes	0.00680552	0.0273484	0.321789	0.467181	0.372113	0.350827	0.53442	0.645303	0.474415	0.385461
ENSMUSG00000042608	MGI:1921428	Stk40	0.00680577	0.0273484	0.703259	0.493867	0.808091	0.880911	0.923642	0.5735	0.721371	0.870065
ENSMUSG00000032382	MGI:1928395	Snx1	0.00695002	0.0278767	0.268399	0.249165	0.13136	0.302006	0.300394	0.461491	0.0471737	0.11723
ENSMUSG00000034120	MGI:98284	Srsf2	0.00698935	0.0279831	0.385589	0.37334	0.038913	0.20184	0.266418	0.634271	0.242192	0.185312
ENSMUSG00000033439	MGI:1925219	Ccdc76	0.00701184	0.0280217	0.748757	0.788479	0.562595	0.839353	0.933476	1.21506	0.782812	0.913382
ENSMUSG00000051495	MGI:2443921	Irf2bp2	0.00706325	0.0281755	0.157329	-0.0404636	-0.29228	-0.190338	0.124158	0.445664	-0.0607774	0.130213
ENSMUSG00000060427	MGI:2142546	Zfp868	0.00711968	0.0283488	0.693405	0.710012	0.685184	1.12368	0.699605	0.731819	0.577748	0.602365
ENSMUSG00000037086	MGI:1916050	1110059M19Rik	0.00722408	0.0287121	0.896642	0.798047	0.666666	0.870435	1.55579	0.680969	1.82276	0.884212
ENSMUSG00000032899	MGI:2141396	Styk1	0.00724199	0.028731	0.540778	0.43884	-0.131733	0.473234	0.53243	0.554959	0.674331	0.963691
ENSMUSG00000030876	MGI:1914862	Mettl9	0.00726825	0.0287828	0.729468	0.467053	0.166557	0.405361	0.577134	0.804585	0.38785	0.237844
ENSMUSG00000001520	MGI:1891884	Nrip2	0.00728839	0.0287954	-0.343247	0.492465	0.39777	1.20444	1.63338	-0.705025	1.51204	0.662386
ENSMUSG00000034674	MGI:108247	Tdg	0.00729784	0.0287954	0.288884	0.19382	0.23448	0.25551	0.33324	0.475406	0.317929	0.158139
ENSMUSG00000025887	MGI:1312922	Casp12	0.00732931	0.0288674	0.865619	0.704498	0.0193281	0.116987	0.313039	0.997107	0.162853	0.264026
ENSMUSG00000047221	MGI:2140983	Fam185a	0.00738495	0.0290342	0.606734	0.71194	0.140566	0.78146	0.290359	0.829015	0.499755	0.159498
ENSMUSG00000004127	MGI:1920421	Rg9mtd2	0.00744241	0.0291767	0.443404	0.547207	0.109793	0.472295	0.444993	0.5004	0.464913	0.276947
ENSMUSG00000044221	MGI:106479	Grsf1	0.00744795	0.0291767	0.213897	0.193621	-0.0706333	0.154896	0.0201698	0.312217	0.236211	-0.0215518
ENSMUSG00000054079	MGI:1923402	Utp18	0.00748643	0.0292749	0.686592	0.437661	0.315237	0.423352	0.348326	0.685012	0.190969	0.227386
ENSMUSG00000046523	MGI:1914766	Kctd4	0.00757657	0.0295744	0.777878	0.84126	0.43018	1.3967	0.434637	0.245474	0.0707387	0.551262
ENSMUSG00000005233	MGI:1913692	Spc25	0.00762363	0.0297049	0.530734	0.407479	-0.070385	0.490071	0.400148	0.680938	0.112188	0.062433
ENSMUSG00000040459	MGI:2442985	Arglu1	0.00763777	0.029707	0.285795	0.276198	-0.108104	0.1582	0.0838901	0.680926	0.18439	0.0680787
ENSMUSG00000035958	MGI:1860486	Tdp2	0.00766491	0.0297595	0.758915	0.605569	0.343511	0.538167	0.431292	1.00667	0.480909	0.276166
ENSMUSG00000022034	MGI:1919238	Esco2	0.00770969	0.0298802	0.95825	0.57444	0.156107	0.895853	0.343659	0.512879	0.233106	0.304083
ENSMUSG00000031668	MGI:1341830	Eif2ak3	0.00774075	0.0299474	0.498234	0.712416	0.803545	0.656743	0.291225	0.233561	0.642432	0.644604
ENSMUSG00000022010	MGI:109127	Tsc22d1	0.00775541	0.029951	0.333223	0.176504	0.0170847	0.00636486	0.190296	0.496217	-0.0601357	0.0582343
ENSMUSG00000024927	MGI:103290	Rela	0.00779287	0.0300425	0.0185227	0.226772	0.197855	0.253315	0.544392	0.448105	0.385441	0.177235
ENSMUSG00000087212	No associated gene	9330188P03Rik	0.00781506	0.0300749	-0.153236	1.34303	0.277997	0.519632	0.616001	1.06908	0.777613	0.612027
ENSMUSG00000021411	MGI:1914145	Pxdc1	0.00783018	0.03008	0.433119	0.301713	0.194038	0.152564	0.738568	0.630925	0.170581	0.410087
ENSMUSG00000028772	MGI:1919955	Zcchc17	0.00789757	0.0302856	0.291261	0.106479	-0.103662	-0.252259	0.027564	0.685568	0.0557987	-0.458776
ENSMUSG00000021115	MGI:1261847	Vrk1	0.00798009	0.0305483	0.143832	0.216152	-0.0229627	0.0188725	0.326403	0.700297	0.0409224	-0.0877597
ENSMUSG00000037149	MGI:2144727	Ddx1	0.00801531	0.030578	0.434826	0.286263	0.0761185	0.24176	0.342444	0.487855	0.33267	0.115448
ENSMUSG00000060716	MGI:2144989	Plekhh1	0.00801587	0.030578	-1.43112	0.0718525	-0.161391	0.297437	0.606909	-0.685651	0.449163	0.180842
ENSMUSG00000024539	MGI:97806	Ptpn2	0.00806052	0.0306947	1.02193	0.943121	0.795843	0.915383	0.709757	1.13764	0.844265	0.519171
ENSMUSG00000024287	MGI:1919668	Thoc1	0.00810066	0.0307938	1.01872	0.755008	0.370589	0.912928	0.586282	1.03425	0.933696	0.558947
ENSMUSG00000005846	MGI:1913659	Rsl1d1	0.0081243	0.0308299	0.756927	0.592548	0.254625	0.547737	0.582302	0.87837	0.375915	0.363702
ENSMUSG00000017652	MGI:88336	Cd40	0.00816675	0.0309373	0.428174	0.635638	0.469082	0.497712	0.811134	1.09861	1.30813	0.518345
ENSMUSG00000029213	MGI:1343485	Commd8	0.00820615	0.0310326	0.729438	0.13813	0.0894554	0.298154	0.217749	0.613144	0.209737	0.114562
ENSMUSG00000027714	MGI:1355319	Exosc9	0.00822495	0.0310499	0.769232	0.486162	0.0893197	0.456019	0.280781	0.879226	0.488619	0.214156
ENSMUSG00000030942	MGI:2444479	Thumpd1	0.00825556	0.0310798	0.150466	0.289166	0.0244715	0.230753	0.266648	0.531328	0.21529	-0.00873886
ENSMUSG00000017767	MGI:1922892	Spata25	0.00826135	0.0310798	1.34574	0.861257	0.412579	0.115409	0.539576	1.75992	0.227421	0.671784
ENSMUSG00000045365	MGI:1923598	Rbm15b	0.00829842	0.0311655	0.676897	0.961897	0.991096	1.20319	0.993404	1.07393	0.904852	0.499361
ENSMUSG00000026582	MGI:98278	Sele	0.00832695	0.0312189	0.427992	0.615371	0.487586	0.907855	0.230431	-0.514365	1.541	0.74373
ENSMUSG00000014550	MGI:1925537	Zfyve20	0.00839381	0.0314156	0.160903	0.129678	0.501747	0.449662	0.364123	0.00713475	0.590431	0.551679
ENSMUSG00000026047	MGI:1919300	Kdelc1	0.00849318	0.0315457	0.454029	0.131408	0.0773788	0.219907	0.0869415	0.23107	0.284515	0.0458971
ENSMUSG00000024604	MGI:1914060	Rbm22	0.00850102	0.0315457	0.355928	0.439149	0.243338	0.229653	0.288026	0.631029	0.332177	0.271037
ENSMUSG00000091405	MGI:2140113	Hist2h4	0.00851191	0.0315457	0.18234	0.511619	0.625588	1.55082	-0.0680337	-0.562384	0.523454	0.538284
ENSMUSG00000024807	MGI:1921376	Syvn1	0.00852963	0.0315457	1.79924	2.19053	2.22223	2.18103	1.9268	2.24372	2.25564	2.13117
ENSMUSG00000059146	MGI:97385	Ntrk3	0.00853629	0.0315457	0.0405232	-0.196331	-1.26032	1.18709	-0.51686	-1.47008	0.0318354	-0.52805
ENSMUSG00000062960	MGI:96683	Kdr	0.00853726	0.0315457	-0.455001	0.262583	0.297756	0.4107	0.603318	-0.371573	0.249549	1.54191
ENSMUSG00000024427	MGI:1345144	Spry4	0.00854183	0.0315457	0.549205	0.470687	0.794196	1.01182	1.16539	0.618708	0.724199	0.527976
ENSMUSG00000079184	MGI:1922589	Mphosph8	0.00854958	0.0315457	0.629348	0.535211	0.254521	0.50644	0.451542	0.59689	0.233968	0.175495
ENSMUSG00000026333	MGI:2182036	Gin1	0.00855868	0.0315457	0.716888	0.106393	0.396863	0.0551228	0.763389	0.746683	0.968471	0.572268
ENSMUSG00000057858	MGI:1289174	D19Ertd737e	0.00860045	0.0316462	0.692947	0.704467	0.235097	0.48194	0.481408	0.803963	0.212073	0.168202
ENSMUSG00000062260	No associated gene	AA415398	0.0086327	0.0317114	0.336137	0.0359653	0.296295	0.315207	-0.256132	0.0372876	0.454186	1.28352
ENSMUSG00000068732	MGI:1914745	Tmem167b	0.00865332	0.0317337	0.46466	0.239928	0.129744	0.30863	0.182535	0.351396	0.0760056	0.234152
ENSMUSG00000001674	MGI:1914192	Ddx18	0.00872483	0.031936	0.490428	0.627602	0.256183	0.554634	0.58728	0.754222	0.270593	0.228015
ENSMUSG00000021615	MGI:1333799	Xrcc4	0.00874271	0.031936	0.46443	0.270034	-0.0589653	0.521465	0.227105	0.774461	-0.0321643	0.100595
ENSMUSG00000047904	MGI:98328	Sstr2	0.0087524	0.031936	1.32722	-0.4543	0.449917	-0.122845	0.11061	-0.565761	-0.726218	-0.30611
ENSMUSG00000025184	MGI:1196316	D19Ertd386e	0.00878711	0.0320091	0.176478	0.316051	0.207433	0.389222	0.364388	0.070481	0.250546	-0.0121082
ENSMUSG00000027022	MGI:2685198	Xirp2	0.00882862	0.0321011	-0.936537	1.19696	-0.153557	0.654449	-0.438094	-0.137492	0.875089	0.228934
ENSMUSG00000019878	MGI:96239	Hsf2	0.00884177	0.0321011	0.515668	0.295149	0.276441	0.253084	0.205114	0.675189	0.0530143	0.148279
ENSMUSG00000039461	MGI:1918829	Tcta	0.00885662	0.0321016	0.147151	0.0116585	-0.0398151	-0.254462	0.0708305	0.519919	0.0868517	0.030539
ENSMUSG00000036693	MGI:1922666	Nop14	0.00893508	0.0323323	0.557961	0.450209	0.348762	0.523614	0.696668	0.727736	0.50286	0.324055
ENSMUSG00000075000	MGI:1354950	Nrbf2	0.00896668	0.0323864	0.635109	0.50404	0.0172837	0.278664	0.006601	0.701521	0.298097	0.468297
ENSMUSG00000048482	MGI:88145	Bdnf	0.00897972	0.0323864	0.905302	0.623871	0.477781	0.715929	0.761036	0.992227	0.75149	0.638887
ENSMUSG00000055723	MGI:1914172	Rras2	0.00902708	0.0325034	0.35182	0.349661	0.0422176	0.213365	0.429188	0.541569	0.258712	0.12108
ENSMUSG00000052271	MGI:891976	Bhlha15	0.00909897	0.0326693	0.793559	1.02569	1.25543	0.343174	0.668605	0.893962	0.968388	1.78688
ENSMUSG00000028879	MGI:1931027	Stx12	0.00910309	0.0326693	0.334501	0.309944	-0.0481977	0.173469	0.180641	0.256075	0.154481	0.101045
ENSMUSG00000032126	MGI:96112	Hmbs	0.00912109	0.0326767	0.465226	0.290883	0.238223	-0.00790817	0.203153	1.0929	0.289582	-0.064474
ENSMUSG00000024970	MGI:2147611	AI846148	0.00913511	0.0326767	-0.0017509	0.257457	0.315822	0.0245432	0.203903	0.521128	0.189855	0.199734
ENSMUSG00000021909	No associated gene	Tnnc1	0.00917009	0.0327482	0.945032	1.00044	0.581098	0.591315	0.866022	1.58185	0.715536	-0.77133
ENSMUSG00000074170	MGI:1919537	Plekhf1	0.00922522	0.0328912	0.136425	0.102103	0.426796	-0.0447552	-0.0220994	0.587434	0.520299	0.0641566
ENSMUSG00000024645	MGI:1920595	Timm21	0.00935118	0.0332352	0.702983	0.0537053	0.169391	0.360261	0.153003	0.413171	0.693464	0.112264
ENSMUSG00000021671	MGI:1914713	Poc5	0.00936507	0.0332352	0.349423	0.358854	0.534162	0.682318	0.2663	0.472421	0.383592	0.494171
ENSMUSG00000039850	MGI:2444688	Endov	0.0093674	0.0332352	0.153583	0.408007	0.490504	0.467874	0.53686	0.183298	0.7926	0.402618
ENSMUSG00000056498	MGI:2444725	Tmem154	0.00971295	0.0344053	0.796618	1.09698	0.843384	0.978295	1.62391	1.3944	1.29962	0.643472
ENSMUSG00000045868	MGI:1921808	Gvin1	0.00974441	0.0344608	0.542079	0.345282	0.433877	1.53719	1.26137	-0.292894	1.06236	0.882915
ENSMUSG00000041762	MGI:1915776	Gpr155	0.00976414	0.0344747	0.895035	0.555996	-0.138451	0.178954	0.270903	-0.213088	0.341963	-0.057635
ENSMUSG00000021713	MGI:2443069	Ppwd1	0.00979678	0.0345341	0.548566	0.491832	0.3232	0.341872	0.29606	0.154988	0.370151	0.190715
ENSMUSG00000073988	MGI:1354168	Ttpa	0.00986009	0.0346797	1.32722	0.902815	0.380755	-0.368625	1.11641	-0.87687	0.445579	0.797088
ENSMUSG00000091018	No associated gene	Rplp2-ps1	0.0098699	0.0346797	0.312601	0.6392	-0.215836	-0.0483181	0.421761	1.55922	-0.148982	0.0013058
ENSMUSG00000038888	MGI:2385277	Ctu1	0.00991004	0.0347193	0.424969	0.221166	0.144091	0.0806872	0.155579	0.519275	0.00876823	0.195914
ENSMUSG00000058537	MGI:3034577	Dux	0.00991446	0.0347193	-0.153466	0.367964	1.10447	-0.516432	-2.57117	1.16874	0.387009	0
ENSMUSG00000037887	MGI:106626	Dusp8	0.00993742	0.0347193	0.951573	0.682496	1.0917	1.28614	1.0166	1.05731	1.23846	0.759183
ENSMUSG00000033970	MGI:1916513	Rfc3	0.0099448	0.0347193	0.268683	0.319041	-0.0993179	-0.119478	0.0707899	0.560848	0.243208	0.145306
ENSMUSG00000005836	MGI:107516	Gata6	0.0100083	0.0348532	-0.35562	0.362674	-0.109152	0.264761	0.534198	0.303743	-0.0062224	0.685868
ENSMUSG00000021062	MGI:1916865	Rab15	0.0100151	0.0348532	-0.245119	0.298841	0.190512	0.0487095	0.638683	0.163171	0.380692	-0.390299
ENSMUSG00000031729	MGI:1919205	Ist1	0.0100488	0.0349149	0.19121	0.156284	0.0760799	0.206907	0.0954365	0.38576	0.143836	-0.0165645
ENSMUSG00000038508	MGI:1346047	Gdf15	0.0101467	0.035199	1.42302	1.0699	0.934072	0.930626	1.82536	1.56543	1.82754	1.1088
ENSMUSG00000026069	MGI:98427	Il1rl1	0.0101853	0.0352612	-0.302886	0.450658	0.422817	0.822395	0.428378	-0.0448505	0.256896	0.598072
ENSMUSG00000023307	MGI:1915207	March5	0.010197	0.0352612	0.571327	0.402342	0.00376983	0.153627	0.273628	0.425436	0.379447	0.317934
ENSMUSG00000068959	MGI:1917477	Zfp619	0.0103452	0.035717	0.306912	0.12065	0.912947	0.920123	0.688879	-0.153752	0.800111	0.449028
ENSMUSG00000019864	MGI:2178759	Rtn4ip1	0.0104272	0.0359392	0.296235	0.853354	0.0870297	0.298967	0.286513	0.21577	0.265156	0.437227
ENSMUSG00000027706	MGI:1916526	Sec62	0.0104424	0.0359392	0.756843	0.437771	0.084472	0.433499	0.212685	0.630758	0.241901	0.287971
ENSMUSG00000024359	MGI:96245	Hspa9	0.0104915	0.0360511	0.629043	0.571318	0.39845	0.627662	0.802343	0.807427	0.521439	0.375518
ENSMUSG00000018372	MGI:2443502	Ccdc45	0.0105991	0.0363636	0.481254	0.389621	0.479704	0.249806	0.45343	0.40509	0.0248445	0.372658
ENSMUSG00000022247	MGI:1915082	Brix1	0.0108133	0.0370404	0.893733	0.554054	0.282684	0.68438	0.528191	1.02256	0.538925	0.4222
ENSMUSG00000030595	MGI:104752	Nfkbib	0.0108684	0.0371707	0.252853	0.224238	0.0391972	-0.0212893	0.521752	0.528092	0.380277	-0.064589
ENSMUSG00000037236	MGI:1298379	Matr3	0.0108877	0.0371783	0.752364	0.614966	0.43621	0.802401	0.51077	0.786623	0.483606	0.424462
ENSMUSG00000025525	MGI:1915367	Apool	0.0109555	0.0372788	0.352105	0.304549	-0.46585	0.166569	0.113001	0.850064	0.184449	0.122686
ENSMUSG00000029217	MGI:98662	Tec	0.0109627	0.0372788	0.161729	0.191034	0.237738	0.370692	0.700425	0.523278	0.413479	0.331269
ENSMUSG00000047330	MGI:1891125	Kcne4	0.0109684	0.0372788	1.03586	0.0699942	0.0221024	0.366873	0.281916	0.192907	-0.00192028	0.703701
ENSMUSG00000060739	MGI:1913883	Nsa2	0.0110917	0.0376395	0.425483	0.326774	-0.0641049	0.0741834	0.106637	0.451283	0.188635	-0.0358704
ENSMUSG00000039518	MGI:3505689	Cdsn	0.0111223	0.0376846	0.425173	-0.302004	0.278283	-0.00451524	0.616255	-0.2902	0.548115	0.189107
ENSMUSG00000025971	MGI:1915365	9430016H08Rik	0.011168	0.0377555	0.627296	0.264683	0.189145	0.167084	0.517346	0.717421	0.33271	0.0837283
ENSMUSG00000021696	MGI:1921809	Elovl7	0.0111778	0.0377555	-0.0767442	0.467937	0.440605	0.469034	1.00148	0.283345	1.64614	0.439031
ENSMUSG00000031422	MGI:1927167	Morf4l2	0.0112165	0.0378276	0.306076	0.222531	0.00940378	0.0978894	0.103412	0.509382	0.101015	0.0211096
ENSMUSG00000038160	MGI:1277186	Atg5	0.0113222	0.0381251	0.327658	0.338626	0.0707508	0.27265	0.421193	0.54462	0.255587	0.0649932
ENSMUSG00000043102	MGI:3630329	Qrfp	0.0114271	0.0384189	-0.0268554	0.353212	-0.539069	0.134922	-0.405332	0.963827	-0.126046	-0.0721611
ENSMUSG00000018572	MGI:1925496	Phf23	0.0114521	0.0384437	0.231035	0.0634608	-0.0844751	-0.105508	-0.00992182	0.549387	-0.0339812	-0.185203
ENSMUSG00000041957	MGI:1914701	Pkp2	0.0115081	0.0385724	0.261522	0.142243	0.126113	0.288882	0.304779	0.315623	0.287873	0.226866
ENSMUSG00000031984	MGI:1913773	2810004N23Rik	0.0115513	0.0386202	0.473593	0.341085	0.00429261	0.247868	0.30647	0.731412	-0.0645766	-0.0456454
ENSMUSG00000040877	MGI:3045255	Wdr25	0.0115577	0.0386202	0.0245076	0.354908	0.604981	0.373704	0.435542	0.708491	0.796521	0.143131
ENSMUSG00000035373	MGI:99512	Ccl7	0.0115906	0.0386708	1.41293	1.26467	1.53531	1.9015	1.58771	1.88581	1.50684	0.857037
ENSMUSG00000024826	MGI:109529	Dpf2	0.011667	0.0388662	0.325649	0.505003	0.379064	0.354904	0.48833	0.522499	0.665457	0.476779
ENSMUSG00000027412	MGI:1891342	Lpin3	0.0117196	0.0389077	0.239593	0.868431	0.923336	0.733816	0.753314	0.328932	0.866527	0.793204
ENSMUSG00000020184	MGI:96952	Mdm2	0.011723	0.0389077	0.420737	0.424343	0.461572	0.756759	0.592447	0.637444	0.586221	0.5079
ENSMUSG00000003541	MGI:104814	Ier3	0.0117329	0.0389077	0.38475	0.4523	0.148439	0.411589	1.22656	0.960353	0.698217	0.558162
ENSMUSG00000043998	MGI:2384966	Mgat2	0.0118531	0.0392323	0.471202	0.475512	0.239353	0.354451	0.26383	0.471092	0.0684891	0.203766
ENSMUSG00000009535	MGI:1915147	Rnmt	0.0118668	0.0392323	0.499424	0.499667	0.170654	0.485358	0.479579	0.769867	0.354838	0.374644
ENSMUSG00000026864	MGI:95835	Hspa5	0.0119959	0.0395991	2.81766	2.84938	2.51514	2.92864	2.93538	3.03057	2.82368	2.53062
ENSMUSG00000043602	MGI:99177	Zfp3	0.0121189	0.0399447	0.701539	0.495019	0.490613	0.354691	0.132969	0.950489	0.0674017	0.348164
ENSMUSG00000032952	MGI:1337130	Ap4b1	0.0122327	0.0402323	0.276197	0.236312	0.360493	0.488632	0.322939	0.61018	0.230836	0.325844
ENSMUSG00000074647	MGI:1918655	Fam83c	0.012243	0.0402323	0.0535899	0.591977	0.660594	0.984533	1.30304	0.383979	0.988266	0.932663
ENSMUSG00000022151	MGI:1914765	Ttc33	0.0123401	0.0404367	0.460448	0.396513	0.274491	0.381576	0.0536722	0.70701	0.0415765	0.0759283
ENSMUSG00000029687	MGI:107940	Ezh2	0.0123423	0.0404367	0.56436	0.433632	0.203605	0.263179	0.318615	0.610854	0.472412	0.213708
ENSMUSG00000020368	MGI:88261	Canx	0.0124111	0.0406012	0.515163	0.685316	0.407149	0.749282	0.68777	0.628665	0.574177	0.478852
ENSMUSG00000027071	MGI:1097160	P2rx3	0.0125222	0.0409032	0.816354	-0.169855	-0.0335374	0.206132	0.361732	-0.527604	0.354666	0.86793
ENSMUSG00000029454	MGI:1333110	Mapkapk5	0.0125733	0.0410087	0.460973	0.242144	0.00877706	0.0738336	0.289439	0.474965	0.222457	0.106002
ENSMUSG00000024146	MGI:1929655	Cript	0.0126116	0.0410723	0.858035	0.289967	-0.130708	0.339234	0.117526	0.406019	0.000580793	0.036062
ENSMUSG00000036882	MGI:2673998	Arhgap33	0.012905	0.0419653	0.285037	0.32991	0.507967	-0.0704949	0.801124	0.0419932	0.693195	-0.377529
ENSMUSG00000090083	MGI:1929069	Rnf8	0.0130785	0.0424661	0.234275	0.462041	0.0404581	0.258262	0.40818	0.611041	0.0427378	-0.0833411
ENSMUSG00000032215	MGI:2681840	Rsl24d1	0.0131143	0.0425193	0.326647	0.00718897	-0.110975	0.0343367	0.149706	0.619972	0.174597	-0.174243
ENSMUSG00000034667	MGI:1920442	Xpot	0.0131785	0.042664	0.427052	0.381137	0.628528	0.845945	0.590655	0.224513	0.791148	0.441642
ENSMUSG00000056531	MGI:1922974	Ccdc18	0.013235	0.0427833	-0.166635	0.998386	0.233113	0.883928	0.84461	0.317535	0.318768	0.704751
ENSMUSG00000019806	MGI:1913503	Aig1	0.0132848	0.0428808	0.620717	0.344747	-0.0013513	0.0129156	0.341754	0.672759	0.240043	0.0886793
ENSMUSG00000078622	MGI:1914413	Ccdc47	0.0133237	0.0429427	0.555067	0.500555	0.24021	0.513036	0.588396	0.572598	0.266116	0.379101
ENSMUSG00000031886	MGI:2443170	Ces2e	0.0134481	0.0432798	-0.634291	0.553134	-0.063899	0.000144303	-0.197454	1.70286	0.0328155	-0.0739875
ENSMUSG00000028331	MGI:1922003	5830415F09Rik	0.0134982	0.0433772	0.53083	0.110543	0.394566	0.0782146	0.348404	1.12648	0.583138	0.630111
ENSMUSG00000078607	MGI:1916316	1810010H24Rik	0.013548	0.0434731	0.807646	0.986444	0.285009	0.288611	1.28097	0.16982	0.999315	-0.554584
ENSMUSG00000002459	MGI:1929866	Rgs20	0.0136219	0.0436461	-0.344801	0.164094	0.339641	0.357798	0.430906	0.779949	0.576245	0.377406
ENSMUSG00000074656	MGI:1914454	Eif2s2	0.0136862	0.0437554	1.13606	0.689814	0.393046	0.666463	0.803992	1.04354	0.798664	0.516416
ENSMUSG00000024789	MGI:96629	Jak2	0.0136961	0.0437554	0.473979	0.365648	0.297355	0.491332	0.448042	-0.26268	0.370925	0.317364
ENSMUSG00000028578	MGI:1915020	Caap1	0.0138043	0.0440365	0.918461	0.641244	0.288049	0.692369	0.692391	0.663893	0.309937	0.162704
ENSMUSG00000027881	MGI:1914171	Prpf38b	0.0138337	0.0440659	0.742005	0.707776	0.390377	0.811124	0.731158	0.615959	0.841519	0.492075
ENSMUSG00000027399	MGI:96542	Il1a	0.0138836	0.0441605	1.15779	1.78247	1.63292	2.04179	2.09678	0.728489	2.73694	2.65052
ENSMUSG00000028576	MGI:1914944	Ift74	0.0139902	0.0444347	0.57382	0.365617	0.106955	0.222399	0.451622	0.561681	0.292063	0.357259
ENSMUSG00000021022	MGI:1930009	Ppp2r3c	0.014064	0.0446043	0.868311	0.599095	0.360721	0.818028	0.675726	1.12887	0.535199	0.0265845
ENSMUSG00000020364	MGI:103172	Zfp354a	0.0141205	0.0446837	0.361254	0.33104	0.0667161	0.985296	0.411892	-0.059376	0.0682229	0.781283
ENSMUSG00000090946	MGI:1919373	Ccdc71l	0.0141352	0.0446837	0.776358	0.773352	0.337721	0.855483	0.822532	1.09609	0.654611	0.374865
ENSMUSG00000030505	MGI:1919224	Prmt3	0.0141505	0.0446837	0.481803	0.476716	0.265365	0.0661205	0.345421	0.615235	0.337773	0.0739099
ENSMUSG00000048776	MGI:97800	Pthlh	0.014175	0.0446962	0.595047	0.00209071	-0.709011	-0.887776	0.147441	1.11816	0.559544	0.541974
ENSMUSG00000032567	MGI:1913845	Aste1	0.0142244	0.0447875	0.654464	0.394365	0.814573	0.671184	0.615146	0.790601	0.757639	0.320479
ENSMUSG00000002083	MGI:2181667	Bbc3	0.0142835	0.0449085	0.522207	0.327011	-0.0940287	0.215271	0.500776	0.457175	0.391492	-0.154247
ENSMUSG00000045273	MGI:1349448	Cenph	0.0143521	0.0450594	0.451898	0.469891	-0.130474	0.135145	0.366224	0.840914	0.298486	0.0229018
ENSMUSG00000037197	MGI:1924188	Rbm17	0.0144014	0.045093	0.287949	0.199712	0.00445971	0.0448532	0.29549	0.573471	0.225791	-0.0684293
ENSMUSG00000027746	MGI:1915140	Ufm1	0.0144125	0.045093	0.425342	0.349258	0.00249354	0.241468	0.165897	0.458703	0.0675045	0.115348
ENSMUSG00000052684	MGI:96646	Jun	0.0144248	0.045093	-0.0337629	-0.0657666	0.165267	0.326848	0.582014	0.570587	-0.0261571	0.124688
ENSMUSG00000021575	MGI:1333776	Ahrr	0.0144987	0.0452256	0.436663	-0.265273	1.09041	0.871073	0.74006	-0.148218	0.105306	0.868866
ENSMUSG00000031701	MGI:1931882	Dnaja2	0.0145087	0.0452256	0.30416	0.292009	0.0725676	0.265936	0.260997	0.4173	0.199376	0.071789
ENSMUSG00000050555	MGI:1924082	Hyls1	0.0146395	0.0455682	0.679744	0.46631	0.168542	0.297953	0.221286	0.684595	0.254115	0.0974631
ENSMUSG00000087141	MGI:3647874	Plcxd2	0.0147967	0.0459635	0.813756	1.21343	1.39733	1.78772	1.55875	1.01982	1.13517	2.41326
ENSMUSG00000030269	MGI:1916075	Mtmr14	0.0148086	0.0459635	0.365035	0.707896	0.694978	0.541549	0.61511	0.68959	0.554913	0.554398
ENSMUSG00000051169	MGI:2141440	Rpusd3	0.0148793	0.0460668	0.511409	0.111457	0.280676	-0.14869	-0.0931149	0.76604	0.184212	0.147351
ENSMUSG00000021114	MGI:1921084	Atp6v1d	0.0148841	0.0460668	0.463506	0.305128	0.0448921	0.0300116	0.085733	0.689537	-0.0135709	-0.0293171
ENSMUSG00000092607	MGI:1341284	Scnm1	0.0149743	0.0462805	0.242921	-0.00376439	0.139923	-0.480415	-0.0823158	0.674793	-0.137787	0.322829
ENSMUSG00000024803	MGI:1097717	Ankrd1	0.0150226	0.0463158	0.522246	0.293218	0.270753	0.52711	0.69606	0.770007	0.393447	0.354175
ENSMUSG00000053192	MGI:1929671	Mllt11	0.0150375	0.0463158	0.0660342	0.112377	-0.0917832	-0.0876922	0.411576	0.463008	0.0883139	0.24294
ENSMUSG00000041632	MGI:1919064	Mrps27	0.0150494	0.0463158	0.115673	0.305998	0.0660488	0.1211	0.410165	0.550778	0.2548	0.074797
ENSMUSG00000029544	MGI:1352750	Cabp1	0.0151129	0.0464404	1.33172	1.59794	0.770393	0.819571	0.415559	1.43497	0.918779	0.136967
ENSMUSG00000022677	MGI:1913336	Fopnl	0.0151325	0.0464404	0.568409	0.266485	-0.156773	0.0963537	0.201918	0.484868	0.000551692	-0.124609
ENSMUSG00000060373	MGI:107795	Hnrnpc	0.0151542	0.0464416	0.273441	0.307869	0.159833	0.196093	0.339684	0.606888	0.269663	0.00402326
ENSMUSG00000031922	MGI:1915551	Cep57	0.015216	0.0465246	0.592024	0.588372	0.386645	0.461392	0.349398	0.848957	0.642953	0.500415
ENSMUSG00000021552	MGI:1891694	Gkap1	0.0152239	0.0465246	0.501871	0.33215	-0.162845	-0.0401393	0.420924	0.685149	0.314868	0.0457652
ENSMUSG00000028044	MGI:1889208	Cks1b	0.0152562	0.0465582	0.400277	0.155963	-0.283772	-0.137821	0.0911422	0.587523	-0.133893	0.0233332
ENSMUSG00000026430	MGI:1926375	Rassf5	0.0153425	0.0467562	0.22897	0.262473	0.243205	0.195928	0.675362	0.397494	0.46255	0.237324
ENSMUSG00000037814	MGI:1914604	Larp1b	0.0153797	0.0467748	0.378625	0.459229	0.0204527	0.211565	0.236747	0.68653	0.209556	0.10613
ENSMUSG00000042447	MGI:2182066	Mios	0.0153915	0.0467748	0.478321	0.258555	0.217559	0.337776	0.191742	0.232013	0.106624	0.257745
ENSMUSG00000051579	MGI:1913934	Tceal8	0.0154478	0.0468378	0.683578	0.411727	-0.135127	0.127179	-0.022548	0.548964	0.0687085	0.0877224
ENSMUSG00000032459	MGI:1928137	Mrps22	0.0154552	0.0468378	0.587272	0.486452	-0.0216428	0.291125	0.278071	0.318835	0.383169	0.142811
ENSMUSG00000015747	MGI:891965	Vps45	0.0154898	0.0468446	0.571244	0.21685	-0.0982967	-0.021051	0.105935	0.791982	-0.0900714	0.0802302
ENSMUSG00000054405	MGI:1915848	Dnajc8	0.015522	0.0468446	0.462767	0.286641	0.0394565	0.119245	0.24327	0.642334	0.23601	0.0642596
ENSMUSG00000030934	MGI:97394	Oat	0.0155297	0.0468446	0.295279	0.326436	0.205303	0.183458	0.0778317	0.381067	0.158241	0.0322031
ENSMUSG00000069678	MGI:1917087	Pcgf1	0.0155433	0.0468446	0.418854	0.0285447	0.111616	0.0197128	-0.0260906	0.697961	0.32401	0.106026
ENSMUSG00000024150	MGI:2183439	Mcfd2	0.015575	0.0468752	0.540139	0.358108	0.176932	0.217446	0.428691	0.643284	0.457964	0.412746
ENSMUSG00000020385	MGI:1098551	Clk4	0.015694	0.0471686	0.889078	0.775037	0.678454	0.8533	0.781454	1.16268	0.782896	0.832578
ENSMUSG00000049225	MGI:2685870	Pdp1	0.0157267	0.0472016	0.350137	0.494495	0.185015	0.336389	0.549419	0.85887	0.192794	0.551807
ENSMUSG00000022322	MGI:1338802	Shcbp1	0.015771	0.0472602	0.515555	0.355154	0.00837519	0.371977	0.276791	0.570684	0.258772	0.107138
ENSMUSG00000029337	MGI:95519	Fgf5	0.0157895	0.0472602	0.803144	0.746271	0.359459	0.0060347	0.834353	0.385858	0.268104	0.462532
ENSMUSG00000027599	MGI:1921502	Armc1	0.0158133	0.0472667	0.531276	0.327078	0.113056	0.474485	0.31079	0.44156	0.336287	0.250183
ENSMUSG00000021635	MGI:1333807	Rad17	0.0158552	0.0473269	0.395277	0.155799	0.117122	0.28959	0.224782	0.483909	0.194856	0.334099
ENSMUSG00000060548	MGI:1352474	Tnfrsf19	0.0159473	0.0474106	0.0342664	0.748879	0.70357	0.142579	0.96239	-0.634163	0.614346	0.638377
ENSMUSG00000029022	MGI:106506	Miip	0.0159573	0.0474106	-0.141488	0.0186249	-0.111536	-0.216741	0.0909331	0.583639	0.108205	-0.134489
ENSMUSG00000022855	MGI:1923076	Senp2	0.0159735	0.0474106	0.400527	0.226889	0.132915	0.334226	0.217517	0.157795	0.2883	0.144478
ENSMUSG00000025007	MGI:1888908	Aldh18a1	0.0159987	0.0474106	0.693026	0.40442	0.673581	0.757293	0.518632	0.1315	0.666548	0.492142
ENSMUSG00000024081	MGI:109386	Cebpz	0.0160204	0.0474106	0.545282	0.382942	0.258723	0.449815	0.397405	0.566916	0.299435	0.251025
ENSMUSG00000044348	MGI:1914312	Mcart6	0.0160349	0.0474106	0.703465	1.30693	-0.111729	0.455292	0.396543	0.110365	0.541044	0.260631
ENSMUSG00000026548	MGI:1923692	Slamf9	0.0160476	0.0474106	0.976286	0.326635	-0.276205	-0.0619434	0.422335	-0.1445	-0.173101	0.48812
ENSMUSG00000049907	MGI:1916189	Rasl11b	0.016057	0.0474106	0.467203	0.402555	0.343621	0.428129	0.817654	0.855213	0.519382	0.390024
ENSMUSG00000026377	MGI:1915199	Mki67ip	0.0161195	0.0474719	0.613102	0.539102	0.196393	0.499752	0.44035	0.741426	0.415534	0.242333
ENSMUSG00000030846	MGI:107913	Tial1	0.016133	0.0474719	0.624967	0.348948	0.0522503	0.435484	0.183554	0.547735	0.568555	0.299419
ENSMUSG00000054237	MGI:1917817	Fra10ac1	0.0161431	0.0474719	0.473313	0.754312	0.0140202	-0.192768	0.452204	1.04623	0.247081	0.197621
ENSMUSG00000040473	MGI:2443778	A330021E22Rik	0.0161869	0.0475367	0.837884	0.248817	0.46369	0.473119	0.452371	0.794589	0.64778	0.672283
ENSMUSG00000055639	MGI:1277991	Dach1	0.0162429	0.0476371	0.156999	-0.0519215	1.27386	0.486096	-0.488409	0.525367	0.250809	0.382272
ENSMUSG00000018733	MGI:2144177	Pex12	0.0162932	0.0477206	0.345359	0.350064	-0.0445841	0.152385	0.398713	0.158912	-0.168379	0.714545
ENSMUSG00000031487	MGI:1913903	Brf2	0.0164097	0.0479973	0.528689	0.611861	0.222499	0.420622	0.571294	0.819616	0.457146	0.28482
ENSMUSG00000032526	MGI:1349474	Deb1	0.0164709	0.0480777	0.612971	0.420706	-0.223128	-0.0385525	0.293652	0.449291	0.134844	-0.231473
ENSMUSG00000040667	MGI:104900	Nup88	0.0164813	0.0480777	0.184755	0.252296	0.0660761	0.213484	0.157131	0.383608	0.257192	0.145841
ENSMUSG00000024737	MGI:1929691	Slc15a3	0.0165268	0.0480962	0.201446	1.48508	0.129829	0.23651	0.168946	-0.259891	1.011	0.718298
ENSMUSG00000025932	MGI:109344	Eya1	0.0165317	0.0480962	0.100668	-0.0491499	0.327251	0.541452	0.766387	0.117513	0.0190939	1.43352
ENSMUSG00000079084	MGI:1913646	Ccdc82	0.016621	0.0482915	0.0752047	0.129547	0.0452594	0.254636	-0.119635	0.388937	0.185495	-0.0207204
ENSMUSG00000042501	MGI:3045348	Cpa6	0.0167213	0.0485185	0.682054	-0.0391398	-0.0834722	0.12638	0.159511	0.364389	0.849508	0.35678
ENSMUSG00000020664	MGI:107450	Dld	0.01689	0.0489016	0.735576	0.748502	0.518292	0.887904	0.89414	0.844895	0.729305	0.484939
ENSMUSG00000021680	MGI:88497	Crhbp	0.0168982	0.0489016	0.998011	0.874379	-0.113744	0.598846	1.08022	0.479379	-0.0516717	0.137062
ENSMUSG00000003135	MGI:106580	D1Bwg0212e	0.0169823	0.0490242	0.239219	0.0676009	-0.0982335	-0.0325568	0.319561	0.485744	0.0835009	0.163727
ENSMUSG00000027583	MGI:1919397	Zbtb46	0.0169855	0.0490242	0.0175009	-0.0718451	0.795511	0.432535	0.524824	0.187831	0.412809	0.348994
ENSMUSG00000020650	MGI:101917	Bcap29	0.0170758	0.0492198	1.01668	0.626268	0.0265324	0.770292	0.454658	1.08713	0.805393	0.421124
ENSMUSG00000021000	MGI:1346056	Ctage5	0.0171082	0.0492482	0.505479	0.486613	0.47016	0.710275	0.836857	0.554013	0.594325	0.639197
ENSMUSG00000020694	MGI:1346023	Tlk2	0.0172948	0.0496554	0.709121	0.714612	0.499213	0.644051	0.477111	0.75843	0.795298	0.396345
ENSMUSG00000031774	MGI:1919637	Fam192a	0.0173176	0.0496554	0.251021	0.209374	-0.0521906	0.12703	0.258916	0.588664	0.0149357	0.15979
ENSMUSG00000034311	MGI:108389	Kif4	0.0173179	0.0496554	0.346219	0.229116	0.272966	0.423297	0.195862	0.424121	0.403994	0.166596
ENSMUSG00000026806	MGI:2682639	Ddx31	0.0174269	0.0497979	0.538708	0.369272	0.39104	0.414765	0.537561	0.514534	0.649726	0.388703
ENSMUSG00000001774	MGI:1914167	Chordc1	0.0174359	0.0497979	1.12317	0.672262	0.290061	0.928105	0.636281	0.817737	0.722407	0.625923
ENSMUSG00000034574	MGI:1914596	Daam1	0.0174533	0.0497979	0.390356	0.516683	0.787435	0.990401	0.8478	0.0322407	0.958574	0.584827
ENSMUSG00000026341	MGI:1921367	Actr3	0.0174589	0.0497979	0.384937	0.347235	0.0627446	0.235235	0.231986	0.411655	0.331419	0.138645
ENSMUSG00000078779	MGI:99206	Zfp59	0.0175109	0.0498203	0.269741	0.578925	0.60375	1.03637	0.430144	0.520392	0.576779	0.531672
ENSMUSG00000046605	MGI:2441705	B3gntl1	0.0175125	0.0498203	0.027279	0.204965	0.592006	0.198428	0.390991	-0.18569	0.579555	0.236682
