# Supplementary material for: The Genetic Architecture of the Genome-Wide Transcriptional Response to ER Stress in the Mouse
Source: PLoS Genet. 2015 Feb 4;11(2):e1004924. doi: 10.1371/journal.pgen.1004924 (PMC4412289; doi:10.1371/journal.pgen.1004924)
Supplement: S4 Table — (XLSX) [file pgen.1004924.s007.xlsx]

## Sheet: Sheet1
SUPPLEMENTAL TABLE 4: Inflmmation genes - pairwise correlations
gene 1	gene 2	correlation (r)	p
Fermt1	Angptl4	0.971	<0.0001
Tnfaip3	Csf2	0.9554	0.0002
Tnf	Il1b	0.9491	0.0003
Irg1	Clec4e	0.9435	0.0004
Nfkbia	Lif	0.9342	0.0007
Tlr2	Csf2	0.9277	0.0009
Tnf	Clec4e	0.9191	0.0012
Cxcl2	Csf2	0.9182	0.0013
Il1b	Icosl	0.9184	0.0013
Slc2a1	Ets2	0.9155	0.0014
Irg1	Il1b	0.9127	0.0016
Tlr2	Slc2a1	0.9122	0.0016
Tnfaip3	Cxcl2	0.9107	0.0017
Tnf	Ccl3	0.9088	0.0018
Tlr2	Cxcl2	0.9051	0.002
Saa3	Cd83	0.9023	0.0022
Cxcl2	Cxcl1	0.9006	0.0023
Il1b	Clec4e	0.8965	0.0026
Pdgfb	Il1b	0.8951	0.0027
Pdgfb	Icosl	0.8902	0.003
Tnf	Irg1	0.8893	0.0031
Cxcl1	Ccl20	0.888	0.0032
Icosl	Cd83	0.8861	0.0034
Saa3	Icosl	0.8861	0.0034
Pdgfb	Ccl3	0.8841	0.0036
Saa3	Niacr1	0.8764	0.0043
Niacr1	Casp4	0.8754	0.0044
Niacr1	Fermt1	0.8756	0.0044
Slc2a1	Arid5a	0.874	0.0045
Pdgfb	Irg1	0.8747	0.0045
Irg1	Icosl	0.8719	0.0048
Tlr2	Ets2	0.871	0.0049
Niacr1	Angptl4	0.8685	0.0051
Tnfaip3	Tlr2	0.8635	0.0057
Fermt1	Casp4	0.8629	0.0058
Il1b	Ccl3	0.8583	0.0064
Il1b	Cd83	0.8556	0.0067
Slc2a1	Cxcl2	0.8529	0.0071
Tnfaip3	Cxcl1	0.851	0.0074
Fermt1	Agpat9	0.8493	0.0076
Tnfaip3	Mmp9	0.8472	0.0079
Angptl4	Agpat9	0.8453	0.0082
Tnf	Pdgfb	0.8449	0.0083
Tnfaip3	Slc2a1	0.8443	0.0084
Tnfaip3	Arid5a	0.8403	0.009
Saa3	Il1b	0.8404	0.009
Slc2a1	Csf2	0.8392	0.0092
Slc2a1	Serpinb2	0.8384	0.0093
Saa3	Casp4	0.8371	0.0095
Serpinb2	Agpat9	0.8367	0.0096
Saa3	Lcn2	0.8319	0.0104
Icosl	Casp4	0.8311	0.0106
Lif	Ets2	0.8306	0.0107
Tnfaip3	Serpinb2	0.8302	0.0107
Lif	Ccl20	0.8247	0.0118
Plk2	Lif	0.8238	0.0119
Irg1	Ccl3	0.8236	0.012
Plk2	Nfkbia	0.8218	0.0123
Slc2a1	Lif	0.8216	0.0124
Lcn2	Icosl	0.8207	0.0125
Nfkbia	Csf2	0.8201	0.0127
Casp4	Angptl4	0.818	0.0131
Lcn2	Cd83	0.8163	0.0134
Slc2a1	Cxcl1	0.8155	0.0136
Angptl4	Adra2a	-0.8152	0.0137
Cxcl2	Ccl20	0.8068	0.0155
Tnf	Icosl	0.8068	0.0155
Ets2	Csf2	0.8066	0.0156
Lcn2	Fermt1	0.8046	0.016
Lif	Cxcl2	0.8021	0.0166
Plk2	Arid5a	0.8011	0.0169
Icosl	Fermt1	0.8003	0.0171
Icosl	Ccl3	0.7983	0.0175
Lif	Csf2	0.7968	0.0179
Niacr1	Cd83	0.7952	0.0183
Icosl	Clec4e	0.7954	0.0183
Nfkbia	Cxcl2	0.7919	0.0192
Cxcl1	Arid5a	0.7913	0.0193
Slfn2	Clec4e	0.7879	0.0202
Ifnar1	Ccl9	0.787	0.0205
Clec4e	Ccl3	0.785	0.021
Tlr2	Agpat9	0.7835	0.0214
Csf2	Arid5a	0.7827	0.0217
Nfkbia	Ets2	0.7817	0.0219
Tlr2	Serpinb2	0.7809	0.0222
Niacr1	Lcn2	0.7756	0.0237
Csf2	Ccl9	0.775	0.0239
Lif	Arid5a	0.7736	0.0243
Clec4e	Cd83	0.7697	0.0255
Serpinb2	Csf2	0.7696	0.0255
Ets2	Cxcl2	0.7684	0.0259
Rcan1	Lif	0.7682	0.026
Tnfaip3	Lif	0.7635	0.0275
Serpinb2	Arid5a	0.7613	0.0282
Nfkbia	Ccl9	0.7612	0.0282
Slc2a1	Plk2	0.76	0.0286
Icosl	Csf2	0.7595	0.0288
Mmp9	Cxcl1	0.7586	0.0291
Pdgfb	Clec4e	0.7582	0.0293
Agpat9	Adra2a	-0.7574	0.0295
Lif	Cxcl1	0.7553	0.0302
Cxcl1	Csf2	0.7537	0.0308
Saa3	Ccl3	0.7506	0.0319
Tnf	Saa3	0.7503	0.032
Fermt1	Cd83	0.7481	0.0328
Mmp9	Csf2	0.748	0.0328
Tnfaip3	Icosl	0.7478	0.0329
Slc2a1	Hbegf	0.7461	0.0335
Saa3	Fermt1	0.7412	0.0354
Tlr2	Nfkbia	0.7398	0.0359
Cd83	Angptl4	0.7389	0.0362
Plk2	Cxcl2	0.7377	0.0367
Pdgfb	Cxcl2	0.7375	0.0368
Mmp9	Irg1	0.7348	0.0378
Tnf	Cd83	0.7333	0.0385
Mmp9	Cxcl2	0.7316	0.0391
Slfn2	Irg1	0.7318	0.0391
Tlr2	Arid5a	0.7314	0.0392
Cd83	Casp4	0.7314	0.0392
Cxcl2	Arid5a	0.7309	0.0394
Tnfaip3	Il1b	0.7294	0.04
Nfkbia	Ccl20	0.728	0.0406
Icosl	Cxcl2	0.7279	0.0406
Saa3	Pdgfb	0.7279	0.0406
Tnfaip3	Agpat9	0.7262	0.0413
Il1b	Cxcl2	0.7259	0.0415
Tnfaip3	Ets2	0.7249	0.0419
Plk2	Ccl20	0.7222	0.0431
Irg1	Cd83	0.7207	0.0437
Niacr1	Agpat9	0.7202	0.0439
Pdgfb	Csf2	0.7203	0.0439
Tnfaip3	Pdgfb	0.7202	0.0439
Slc2a1	Nfkbia	0.7193	0.0443
Pdgfb	Mmp9	0.7179	0.0449
Tlr2	Cxcl1	0.7176	0.0451
Niacr1	Icosl	0.7167	0.0454
Rcan1	Plk2	0.7166	0.0455
Tlr2	Lif	0.7153	0.0461
Pdgfb	Ccl9	0.7146	0.0464
Tnf	Cxcl2	0.7142	0.0466
Rcan1	Ccl20	0.7108	0.0481
Serpinb2	Ets2	0.7101	0.0484
Tnf	Slfn2	0.7101	0.0484
Plk2	Cxcl1	0.7097	0.0486
Icosl	Angptl4	0.7085	0.0492
Zc3h12a	Mmp9	0.7071	0.0498
	TF binding sites
Blue	RelA
Red	NF-kB1
Purple	Both
