# Supplementary material for: The Genetic Architecture of the Genome-Wide Transcriptional Response to ER Stress in the Mouse
Source: PLoS Genet. 2015 Feb 4;11(2):e1004924. doi: 10.1371/journal.pgen.1004924 (PMC4412289; doi:10.1371/journal.pgen.1004924)
Supplement: S5 Table — (XLSX) [file pgen.1004924.s008.xlsx]

## Sheet: Informative genes
SUPPLEMENTAL TABLE 5: Informative genes
			Informative in a strain?*
Ensembl	ID	Symbol	CAST	WSB	NZO	129	NOD
ENSMUSG00000056201	MGI:101757	Cfl1	1	0	0	0	0
ENSMUSG00000029439	MGI:101760	Sfswap	1	0	0	1	1
ENSMUSG00000056758	MGI:101761	Hmga2	1	1	0	0	0
ENSMUSG00000008398	MGI:101762	Elk3	1	1	1	1	1
ENSMUSG00000062929	MGI:101763	Cfl2	1	1	0	0	1
ENSMUSG00000028969	MGI:101765	Cdk5	1	0	1	0	0
ENSMUSG00000032547	MGI:101766	Ryk	1	0	0	0	0
ENSMUSG00000038612	MGI:101769	Mcl1	1	0	0	0	0
ENSMUSG00000041308	MGI:101771	Sntb2	1	1	0	0	0
ENSMUSG00000027488	MGI:101772	Snta1	1	0	0	0	0
ENSMUSG00000026249	MGI:101780	Serpine2	1	1	1	1	1
ENSMUSG00000025758	MGI:101783	Plk4	1	0	0	0	0
ENSMUSG00000004891	MGI:101784	Nes	1	0	1	0	1
ENSMUSG00000017861	MGI:101785	Mybl2	1	0	0	1	0
ENSMUSG00000028890	MGI:101786	Mtf1	1	0	1	0	0
ENSMUSG00000056394	MGI:101789	Lig1	1	0	0	1	0
ENSMUSG00000027533	MGI:101790	Fabp5	1	1	1	1	0
ENSMUSG00000048376	MGI:101802	F2r	1	1	1	1	0
ENSMUSG00000003865	MGI:101805	Gys1	1	0	0	0	0
ENSMUSG00000028247	MGI:101813	Coq3	1	1	0	0	0
ENSMUSG00000044042	MGI:101815	Fmn1	1	0	1	0	1
ENSMUSG00000024151	MGI:101816	Msh2	1	0	0	0	0
ENSMUSG00000013539	MGI:101825	D16H22S680E	1	1	0	0	0
ENSMUSG00000035198	MGI:101834	Tubg1	1	0	0	0	0
ENSMUSG00000026942	MGI:101835	Traf2	1	0	0	0	0
ENSMUSG00000026875	MGI:101836	Traf1	1	0	0	0	0
ENSMUSG00000014767	MGI:101838	Tbp	1	1	0	0	1
ENSMUSG00000041859	MGI:101845	Mcm3	1	1	1	1	1
ENSMUSG00000032192	MGI:101848	Gnb5	1	1	1	0	1
ENSMUSG00000040455	MGI:101850	Usp45	1	0	0	0	0
ENSMUSG00000020124	MGI:101857	Usp15	1	0	0	0	1
ENSMUSG00000058690	MGI:101859	Gcap14	1	1	1	1	1
ENSMUSG00000039952	MGI:101864	Dag1	1	1	0	0	0
ENSMUSG00000055320	MGI:101876	Tead1	1	0	1	0	0
ENSMUSG00000032228	MGI:101877	Tcf12	1	1	1	1	1
ENSMUSG00000002250	MGI:101884	Ppard	1	0	0	0	0
ENSMUSG00000026565	MGI:101898	Pou2f1	1	0	0	0	0
ENSMUSG00000000957	MGI:101900	Mmp14	1	1	1	1	0
ENSMUSG00000079852	MGI:101904	Klra4	0	0	1	0	0
ENSMUSG00000021678	MGI:101910	F2rl1	1	1	1	1	0
ENSMUSG00000022174	MGI:101912	Dad1	1	1	1	1	1
ENSMUSG00000020650	MGI:101917	Bcap29	1	0	0	0	0
ENSMUSG00000031731	MGI:101919	Ap1g1	1	0	0	0	0
ENSMUSG00000002957	MGI:101920	Ap2a2	1	1	0	0	0
ENSMUSG00000060279	MGI:101921	Ap2a1	1	0	0	0	0
ENSMUSG00000028364	MGI:101922	Tnc	1	1	0	0	0
ENSMUSG00000024597	MGI:101924	Slc12a2	1	1	1	0	0
ENSMUSG00000037852	MGI:101932	Cpe	1	1	1	0	1
ENSMUSG00000038482	MGI:101934	Tfdp1	1	0	0	0	0
ENSMUSG00000032498	MGI:101938	Mlh1	1	0	0	1	0
ENSMUSG00000030220	MGI:101940	Arhgdib	1	1	1	1	1
ENSMUSG00000027490	MGI:101941	E2f1	1	0	1	0	0
ENSMUSG00000015957	MGI:101948	Wnt11	1	1	0	0	0
ENSMUSG00000028854	MGI:102462	Slc9a1	0	1	0	1	1
ENSMUSG00000040548	MGI:102465	Tex2	1	0	0	0	0
ENSMUSG00000026604	MGI:102467	Ptpn14	1	1	0	1	0
ENSMUSG00000054580	MGI:102468	Pla2r1	1	0	0	0	0
ENSMUSG00000033016	MGI:102469	Nfatc1	1	1	1	1	0
ENSMUSG00000027447	MGI:102519	Cst3	1	1	1	0	1
ENSMUSG00000004264	MGI:102520	Phb2	1	0	0	0	0
ENSMUSG00000038274	MGI:102547	Fau	1	0	0	0	0
ENSMUSG00000002496	MGI:102548	Tsc2	1	1	1	1	0
ENSMUSG00000072082	MGI:102551	Ccnf	0	1	1	1	0
ENSMUSG00000020936	MGI:102579	Nmt1	1	1	0	0	0
ENSMUSG00000066441	MGI:102581	Rdh11	1	1	0	0	0
ENSMUSG00000018830	MGI:102643	Myh11	1	1	0	0	0
ENSMUSG00000003099	MGI:102666	Ppp5c	1	0	0	1	0
ENSMUSG00000023088	MGI:102676	Abcc1	1	1	0	0	0
ENSMUSG00000020536	MGI:102682	Llgl1	1	1	1	0	0
ENSMUSG00000020687	MGI:102685	Cdc27	1	0	0	1	1
ENSMUSG00000049932	MGI:102688	H2afx	1	0	0	1	0
ENSMUSG00000006442	MGI:102690	Srm	0	0	1	0	1
ENSMUSG00000033278	MGI:102694	Ptprm	1	1	1	0	0
ENSMUSG00000033295	MGI:102695	Ptprf	1	1	1	1	0
ENSMUSG00000025348	MGI:102700	Itga7	1	0	0	0	1
ENSMUSG00000021273	MGI:102706	Fdft1	1	0	0	0	0
ENSMUSG00000007655	MGI:102709	Cav1	1	0	0	0	0
ENSMUSG00000009621	MGI:102718	Vav2	1	0	0	0	0
ENSMUSG00000001151	MGI:102722	Pcnt	1	0	0	0	0
ENSMUSG00000041763	MGI:102724	Tpp2	1	0	0	0	0
ENSMUSG00000045996	MGI:102725	Polr2k	1	0	0	1	1
ENSMUSG00000029366	MGI:102726	Dck	1	0	1	0	0
ENSMUSG00000024369	MGI:102744	Rdbp	1	1	0	0	1
ENSMUSG00000000275	MGI:102749	Trim25	1	1	1	1	1
ENSMUSG00000028042	MGI:102755	Zbtb7b	1	0	0	0	0
ENSMUSG00000026204	MGI:102765	Ptprn	1	1	0	0	0
ENSMUSG00000030605	MGI:102768	Mfge8	1	0	0	1	1
ENSMUSG00000028270	MGI:102772	Gbp2	1	0	0	0	0
ENSMUSG00000028029	MGI:102774	Aimp1	1	1	1	1	0
ENSMUSG00000003033	MGI:102776	Ap1m1	1	1	1	1	0
ENSMUSG00000024134	MGI:102778	Six2	1	0	0	0	0
ENSMUSG00000024742	MGI:102779	Fen1	1	0	0	0	0
ENSMUSG00000051367	MGI:102780	Six1	1	0	0	1	0
ENSMUSG00000030782	MGI:102784	Tgfb1i1	1	0	0	1	1
ENSMUSG00000073639	MGI:102790	Rab18	1	1	0	1	0
ENSMUSG00000022816	MGI:102793	Fstl1	1	1	0	0	0
ENSMUSG00000018796	MGI:102797	Acsl1	1	0	1	1	0
ENSMUSG00000052155	MGI:102806	Acvr2a	1	0	0	0	0
ENSMUSG00000021070	MGI:102845	Bdkrb2	1	0	0	0	0
ENSMUSG00000026436	MGI:102853	Elk4	1	0	1	0	0
ENSMUSG00000058558	MGI:102854	Rpl5	1	0	0	0	0
ENSMUSG00000029135	MGI:102858	Fosl2	1	1	0	0	0
ENSMUSG00000021614	MGI:102889	Vcan	1	1	1	0	1
ENSMUSG00000020326	MGI:102890	Ccng1	1	0	0	1	0
ENSMUSG00000031659	MGI:102891	Adcy7	1	0	1	1	1
ENSMUSG00000030513	MGI:102897	Pcsk6	1	1	0	1	1
ENSMUSG00000004815	MGI:102918	Dgkq	1	0	1	1	1
ENSMUSG00000009739	MGI:102935	Pou6f1	1	1	1	1	1
ENSMUSG00000069089	MGI:102956	Cdk7	1	1	0	0	0
ENSMUSG00000032553	MGI:102964	Srprb	1	1	0	0	1
ENSMUSG00000024376	MGI:103007	Epb4.1l4a	1	0	0	0	0
ENSMUSG00000024044	MGI:103008	Epb4.1l3	1	0	0	1	0
ENSMUSG00000019978	MGI:103009	Epb4.1l2	1	1	1	1	1
ENSMUSG00000027624	MGI:103010	Epb4.1l1	1	1	1	1	0
ENSMUSG00000014859	MGI:103012	E2f4	1	0	0	0	0
ENSMUSG00000051331	MGI:103013	Cacna1c	1	1	0	1	0
ENSMUSG00000040385	MGI:103016	Ppp1ca	1	0	0	0	0
ENSMUSG00000003420	MGI:103017	Fcgrt	1	0	1	1	0
ENSMUSG00000030243	MGI:103021	Recql	1	1	0	0	1
ENSMUSG00000002147	MGI:103034	Stat6	1	1	1	0	0
ENSMUSG00000020919	MGI:103035	Stat5b	1	0	0	0	0
ENSMUSG00000004043	MGI:103036	Stat5a	1	0	0	0	0
ENSMUSG00000004040	MGI:103038	Stat3	1	1	0	0	0
ENSMUSG00000040033	MGI:103039	Stat2	1	0	0	1	0
ENSMUSG00000026727	MGI:103040	Rsu1	1	0	0	0	0
ENSMUSG00000028108	MGI:103060	Ecm1	1	1	1	0	0
ENSMUSG00000026104	MGI:103063	Stat1	1	0	1	0	0
ENSMUSG00000022391	MGI:103071	Rangap1	1	0	1	0	0
ENSMUSG00000029860	MGI:103072	Zyx	1	0	0	0	0
ENSMUSG00000031016	MGI:103075	Wee1	1	0	0	0	1
ENSMUSG00000022479	MGI:103076	Vdr	1	0	1	1	1
ENSMUSG00000041488	MGI:103077	Stx3	1	0	0	0	0
ENSMUSG00000043991	MGI:103079	Pura	1	0	1	0	1
ENSMUSG00000014355	MGI:103097	Anapc1	1	0	0	0	1
ENSMUSG00000028583	MGI:103098	Pdpn	1	1	0	1	1
ENSMUSG00000041697	MGI:103099	Cox6a1	1	0	0	0	0
ENSMUSG00000060147	MGI:103123	Serpinb6a	1	1	0	0	0
ENSMUSG00000021381	MGI:103124	Barx1	1	0	0	0	0
ENSMUSG00000018707	MGI:103147	Dync1h1	1	1	0	0	0
ENSMUSG00000029223	MGI:103149	Uchl1	0	1	0	1	1
ENSMUSG00000017754	MGI:103151	Pltp	1	0	1	0	0
ENSMUSG00000032578	MGI:103159	Cish	1	1	1	1	1
ENSMUSG00000020364	MGI:103172	Zfp354a	1	0	1	0	0
ENSMUSG00000023951	MGI:103178	Vegfa	1	0	1	0	1
ENSMUSG00000050410	MGI:103180	Tcf19	1	0	0	0	1
ENSMUSG00000072941	MGI:103181	Sod3	1	0	0	1	0
ENSMUSG00000001436	MGI:103182	Slc19a1	1	0	0	0	0
ENSMUSG00000025878	MGI:103185	Uimc1	1	0	1	1	1
ENSMUSG00000003849	MGI:103187	Nqo1	1	0	0	0	0
ENSMUSG00000008575	MGI:103188	Nfib	1	0	0	0	0
ENSMUSG00000005410	MGI:103197	Mcm5	1	0	1	1	0
ENSMUSG00000032477	MGI:103198	Cdc25a	1	0	0	0	0
ENSMUSG00000022673	MGI:103199	Mcm4	1	0	0	0	0
ENSMUSG00000004655	MGI:103201	Aqp1	1	0	0	0	0
ENSMUSG00000022407	MGI:103202	Adsl	1	0	0	0	0
ENSMUSG00000033933	MGI:103223	Vhl	1	0	0	0	0
ENSMUSG00000032051	MGI:103224	Fdx1	1	0	0	0	0
ENSMUSG00000017778	MGI:103226	Cox7c	1	0	0	1	0
ENSMUSG00000020176	MGI:103232	Grb10	1	0	0	0	0
ENSMUSG00000030451	MGI:103234	Herc2	1	0	1	1	0
ENSMUSG00000025060	MGI:103241	Slk	1	0	1	0	1
ENSMUSG00000040669	MGI:103248	Phc1	1	0	1	1	1
ENSMUSG00000019370	MGI:103249	Calm3	1	0	1	1	0
ENSMUSG00000020917	MGI:103251	Acly	1	0	0	0	0
ENSMUSG00000053604	MGI:103254	Rpia	1	0	0	0	1
ENSMUSG00000028894	MGI:103257	Inpp5b	1	1	0	0	1
ENSMUSG00000031442	MGI:103263	Mcf2l	1	0	1	1	0
ENSMUSG00000028059	MGI:103264	Arhgef2	1	0	0	0	0
ENSMUSG00000019779	MGI:103265	Frk	1	0	0	0	0
ENSMUSG00000039899	MGI:103266	Fgl2	1	0	0	1	1
ENSMUSG00000031490	MGI:103267	Eif4ebp1	1	1	0	0	0
ENSMUSG00000026740	MGI:103268	Dnajc1	1	0	0	0	0
ENSMUSG00000023990	MGI:103270	Tcfeb	1	0	0	0	0
ENSMUSG00000019302	MGI:103286	Atp6v0a1	1	1	0	0	0
ENSMUSG00000067148	MGI:103288	Polr1c	0	0	0	0	1
ENSMUSG00000002983	MGI:103289	Relb	1	1	0	1	0
ENSMUSG00000024927	MGI:103290	Rela	1	0	0	0	1
ENSMUSG00000062115	MGI:103291	Rai1	1	1	1	1	1
ENSMUSG00000034573	MGI:103293	Ptpn13	0	1	0	0	0
ENSMUSG00000040613	MGI:103298	Apobec1	0	1	0	0	0
ENSMUSG00000027641	MGI:103300	Rbl1	1	0	0	0	0
ENSMUSG00000002489	MGI:103306	Tiam1	1	1	1	0	0
ENSMUSG00000003352	MGI:103307	Cacnb3	1	1	0	0	0
ENSMUSG00000061981	MGI:103309	Flot2	1	0	0	0	0
ENSMUSG00000019889	MGI:103310	Ptprk	1	1	0	0	1
ENSMUSG00000004319	MGI:103555	Clcn3	0	0	1	0	0
ENSMUSG00000061353	MGI:103556	Cxcl12	1	0	0	0	0
ENSMUSG00000030094	MGI:103557	Xpc	1	0	0	0	0
ENSMUSG00000022905	MGI:103560	Kpna1	1	1	0	0	0
ENSMUSG00000018362	MGI:103561	Kpna2	1	1	1	1	1
ENSMUSG00000071637	MGI:103573	Cebpd	1	0	0	0	0
ENSMUSG00000038193	MGI:103580	Hand2	1	0	0	0	0
ENSMUSG00000026048	MGI:103582	Ercc5	1	1	0	1	1
ENSMUSG00000079109	MGI:104288	Pms2	1	0	0	1	0
ENSMUSG00000027298	MGI:104294	Tyro3	1	1	1	1	1
ENSMUSG00000039942	MGI:104311	Ptger4	1	0	0	0	0
ENSMUSG00000048616	MGI:104327	Nog	0	0	1	0	1
ENSMUSG00000020282	MGI:104328	Rhbdf1	1	1	0	0	1
ENSMUSG00000046949	MGI:104513	Nqo2	1	0	0	0	0
ENSMUSG00000026187	MGI:104517	Xrcc5	1	0	0	0	0
ENSMUSG00000042428	MGI:104532	Mgat3	0	0	0	1	1
ENSMUSG00000019122	MGI:104533	Ccl9	1	0	0	0	0
ENSMUSG00000000301	MGI:104535	Pemt	1	0	0	0	0
ENSMUSG00000017146	MGI:104537	Brca1	1	0	0	0	0
ENSMUSG00000003809	MGI:104541	Gcdh	1	1	0	1	1
ENSMUSG00000055322	MGI:104552	Tns1	1	1	0	0	0
ENSMUSG00000023067	MGI:104556	Cdkn1a	1	0	0	0	1
ENSMUSG00000003644	MGI:104558	Rps6ka1	1	0	0	1	0
ENSMUSG00000005973	MGI:104559	Rcn1	1	0	0	0	0
ENSMUSG00000034187	MGI:104560	Nsf	1	1	0	0	0
ENSMUSG00000024581	MGI:104561	Napg	1	0	1	0	0
ENSMUSG00000027438	MGI:104562	Napb	1	0	0	0	0
ENSMUSG00000006024	MGI:104563	Napa	1	1	1	1	0
ENSMUSG00000003031	MGI:104565	Cdkn1b	1	0	1	1	1
ENSMUSG00000000605	MGI:104571	Clcn4-2	1	1	1	1	1
ENSMUSG00000029674	MGI:104572	Limk1	1	1	0	0	0
ENSMUSG00000039844	MGI:104580	Rapgef1	1	1	1	1	0
ENSMUSG00000027669	MGI:104581	Gnb4	1	0	1	1	1
ENSMUSG00000006276	MGI:104582	Eps15l1	0	1	1	1	0
ENSMUSG00000028552	MGI:104583	Eps15	1	1	0	1	0
ENSMUSG00000059430	MGI:104589	Actg2	1	0	1	0	0
ENSMUSG00000041120	MGI:104591	Nbl1	0	1	0	0	0
ENSMUSG00000027611	MGI:104596	Procr	1	1	1	1	1
ENSMUSG00000026414	MGI:104597	Tnnt2	1	0	0	0	0
ENSMUSG00000035597	MGI:104602	Prpf39	1	0	1	0	0
ENSMUSG00000022436	MGI:104603	Sh3bp1	1	1	1	0	0
ENSMUSG00000002059	MGI:104606	Rab34	1	1	0	0	0
ENSMUSG00000041390	MGI:104611	Mdfic	1	0	0	0	0
ENSMUSG00000014313	MGI:104614	Cox6c	0	1	0	0	0
ENSMUSG00000026131	MGI:104627	Dst	1	1	1	1	1
ENSMUSG00000021266	MGI:104630	Wars	1	1	0	0	0
ENSMUSG00000019820	MGI:104631	Utrn	1	1	0	0	0
ENSMUSG00000039159	MGI:104632	Ube2h	1	0	0	0	0
ENSMUSG00000024642	MGI:104633	Tle4	1	0	0	0	0
ENSMUSG00000032280	MGI:104634	Tle3	1	0	0	1	0
ENSMUSG00000034771	MGI:104635	Tle2	1	0	0	0	0
ENSMUSG00000008305	MGI:104636	Tle1	1	1	0	1	1
ENSMUSG00000029287	MGI:104637	Tgfbr3	1	0	0	0	0
ENSMUSG00000027832	MGI:104641	Ptx3	1	0	0	0	0
ENSMUSG00000023206	MGI:104644	Il15ra	1	0	0	0	0
ENSMUSG00000027215	MGI:104651	Cd82	1	0	1	0	0
ENSMUSG00000019943	MGI:104653	Atp2b1	1	1	0	0	0
ENSMUSG00000036986	MGI:104662	Pml	1	0	0	0	0
ENSMUSG00000026600	MGI:104665	Soat1	1	1	0	0	0
ENSMUSG00000020330	MGI:104667	Hmmr	1	0	0	0	0
ENSMUSG00000024085	MGI:104669	Man2a1	1	1	0	0	0
ENSMUSG00000024222	MGI:104670	Fkbp5	1	1	0	0	0
ENSMUSG00000028771	MGI:104673	Ptpn12	1	0	1	0	0
ENSMUSG00000008763	MGI:104676	Man1a2	1	0	1	0	0
ENSMUSG00000003746	MGI:104677	Man1a	1	0	0	0	0
ENSMUSG00000027800	MGI:104678	Tm4sf1	1	0	0	0	0
ENSMUSG00000073676	MGI:104680	Hspe1	1	0	0	0	1
ENSMUSG00000025793	MGI:104681	Hgs	1	1	0	0	0
ENSMUSG00000015994	MGI:104683	Fnta	1	0	1	1	1
ENSMUSG00000015766	MGI:104684	Eps8	1	1	1	1	0
ENSMUSG00000007805	MGI:104685	Twist2	1	0	0	0	0
ENSMUSG00000006134	MGI:104686	Crkl	1	1	0	0	0
ENSMUSG00000007739	MGI:104689	Cct4	1	1	0	0	0
ENSMUSG00000034341	MGI:104709	Wbp2	1	0	0	0	0
ENSMUSG00000030035	MGI:104710	Wbp1	1	0	1	1	0
ENSMUSG00000020160	MGI:104717	Meis1	0	0	1	1	1
ENSMUSG00000054008	MGI:104719	Ndst1	1	0	0	0	1
ENSMUSG00000018861	MGI:104724	Fdxr	1	0	1	1	1
ENSMUSG00000025867	MGI:104726	Cplx2	1	0	0	0	0
ENSMUSG00000021501	MGI:104728	Caml	1	1	0	0	0
ENSMUSG00000018428	MGI:104729	Akap1	0	1	1	1	1
ENSMUSG00000011831	MGI:104736	Evi5	1	0	1	1	1
ENSMUSG00000073802	MGI:104737	Cdkn2b	1	1	1	1	0
ENSMUSG00000044303	MGI:104738	Cdkn2a	1	1	0	0	0
ENSMUSG00000021025	MGI:104741	Nfkbia	1	0	0	0	0
ENSMUSG00000020598	MGI:104750	Nrcam	1	0	1	0	0
ENSMUSG00000030595	MGI:104752	Nfkbib	1	1	0	1	0
ENSMUSG00000024042	MGI:104754	Sik1	1	1	1	1	1
ENSMUSG00000039115	MGI:104756	Itga9	1	1	0	0	1
ENSMUSG00000029710	MGI:104757	Ephb4	1	0	1	1	1
ENSMUSG00000001555	MGI:104769	Fkbp10	1	0	0	0	0
ENSMUSG00000025358	MGI:104772	Cdk2	1	0	0	0	0
ENSMUSG00000050541	MGI:104774	Adra1b	1	0	0	0	0
ENSMUSG00000024960	MGI:104778	Plcb3	1	0	0	0	0
ENSMUSG00000022672	MGI:104779	Prkdc	1	0	0	0	0
ENSMUSG00000046876	MGI:104783	Atxn1	1	0	0	0	0
ENSMUSG00000033577	MGI:104785	Myo6	1	1	1	1	1
ENSMUSG00000031907	MGI:104786	Zfp90	0	1	0	0	0
ENSMUSG00000013698	MGI:104799	Pea15a	1	1	1	1	1
ENSMUSG00000001942	MGI:104803	Siae	1	0	1	0	0
ENSMUSG00000008333	MGI:104805	Snrpb2	1	0	1	0	0
ENSMUSG00000028577	MGI:104810	Plaa	1	1	0	0	0
ENSMUSG00000022205	MGI:104811	Sub1	1	0	0	0	0
ENSMUSG00000038518	MGI:104813	Jarid2	1	0	0	0	0
ENSMUSG00000003541	MGI:104814	Ier3	0	1	0	0	1
ENSMUSG00000053560	MGI:104815	Ier2	1	1	0	1	1
ENSMUSG00000015165	MGI:104816	Hnrnpl	1	1	0	1	0
ENSMUSG00000004980	MGI:104819	Hnrnpa2b1	1	1	0	0	1
ENSMUSG00000020610	MGI:104837	Amz2	1	0	1	1	1
ENSMUSG00000021990	MGI:104838	Spata13	1	0	0	0	0
ENSMUSG00000022742	MGI:104841	Cpox	1	0	0	0	0
ENSMUSG00000033983	MGI:104842	Coil	0	0	1	1	0
ENSMUSG00000026102	MGI:104848	Inpp1	1	1	1	0	0
ENSMUSG00000026399	MGI:104850	Cd55	1	0	0	0	1
ENSMUSG00000038023	MGI:104855	Atp6v0a2	1	0	0	0	0
ENSMUSG00000030268	MGI:104861	Bcat1	1	1	0	1	1
ENSMUSG00000025823	MGI:104864	Pdia4	1	0	0	0	1
ENSMUSG00000014956	MGI:104871	Ppp1cb	1	0	0	0	0
ENSMUSG00000031521	MGI:104873	Aga	1	1	1	1	0
ENSMUSG00000004056	MGI:104874	Akt2	1	1	0	0	0
ENSMUSG00000030339	MGI:104875	Ltbr	1	0	0	0	1
ENSMUSG00000020612	MGI:104878	Prkar1a	1	0	1	0	0
ENSMUSG00000018286	MGI:104880	Psmb6	1	0	0	0	0
ENSMUSG00000060073	MGI:104883	Psma3	1	0	1	1	0
ENSMUSG00000014769	MGI:104884	Psmb1	1	1	0	0	1
ENSMUSG00000015671	MGI:104885	Psma2	0	1	0	0	1
ENSMUSG00000059743	MGI:104888	Fdps	1	0	0	0	0
ENSMUSG00000009741	MGI:104889	Ubp1	1	1	0	0	0
ENSMUSG00000029249	MGI:104897	Rest	1	1	0	0	0
ENSMUSG00000027346	MGI:104898	Gpcpd1	1	0	0	0	0
ENSMUSG00000025979	MGI:104899	Mobkl3	1	0	0	0	1
ENSMUSG00000040667	MGI:104900	Nup88	1	0	0	0	0
ENSMUSG00000030796	MGI:104904	Tead2	1	0	0	0	0
ENSMUSG00000059456	MGI:104908	Ptk2b	1	1	1	1	1
ENSMUSG00000020211	MGI:104912	Sf3a2	1	1	0	0	0
ENSMUSG00000058835	MGI:104913	Abi1	1	1	0	0	0
ENSMUSG00000021281	MGI:104960	Tnfaip2	1	1	0	0	0
ENSMUSG00000017615	MGI:104961	Tnfaip1	1	1	0	0	0
ENSMUSG00000036437	MGI:104963	Npy1r	1	0	0	0	0
ENSMUSG00000003316	MGI:104967	Glg1	0	1	0	0	0
ENSMUSG00000062729	MGI:104968	Ppox	1	1	1	1	1
ENSMUSG00000022514	MGI:104975	Il1rap	1	0	0	0	0
ENSMUSG00000032097	MGI:104976	Ddx6	1	1	1	1	1
ENSMUSG00000001349	MGI:104979	Cnn1	1	1	0	0	1
ENSMUSG00000056216	MGI:104982	Cebpg	1	0	1	0	0
ENSMUSG00000021485	MGI:104987	Mxd3	1	0	0	0	0
ENSMUSG00000032350	MGI:104990	Gclc	1	1	1	0	1
ENSMUSG00000037235	MGI:104991	Mxd4	1	1	0	0	0
ENSMUSG00000028124	MGI:104995	Gclm	1	0	0	0	0
ENSMUSG00000019256	MGI:105043	Ahr	1	0	1	1	0
ENSMUSG00000026803	MGI:105044	Ttf1	1	0	0	1	0
ENSMUSG00000020708	MGI:105047	Psmc5	1	0	0	0	0
ENSMUSG00000029267	MGI:105050	Mtf2	1	0	1	0	0
ENSMUSG00000029657	MGI:105053	Hsph1	1	0	0	0	0
ENSMUSG00000020173	MGI:105056	Cobl	1	0	1	0	0
ENSMUSG00000022843	MGI:105061	Clcn2	1	0	0	0	0
ENSMUSG00000034789	MGI:105065	Rab24	1	1	1	1	1
ENSMUSG00000020671	MGI:105066	Rab10	1	0	0	0	0
ENSMUSG00000079477	MGI:105068	Rab7	1	0	0	0	0
ENSMUSG00000053291	MGI:105071	Rab4b	1	0	0	0	0
ENSMUSG00000027519	MGI:105072	Rab22a	1	1	0	0	0
ENSMUSG00000056429	MGI:105080	Tgoln1	1	1	0	0	0
ENSMUSG00000029552	MGI:105081	Tes	1	1	0	0	0
ENSMUSG00000021427	MGI:105082	Ssr1	1	0	0	1	0
ENSMUSG00000031666	MGI:105085	Rbl2	1	1	1	1	1
ENSMUSG00000020902	MGI:105088	Ntn1	1	0	0	0	0
ENSMUSG00000024507	MGI:105089	Hsd17b4	1	0	0	0	0
ENSMUSG00000027552	MGI:105091	E2f5	1	0	0	0	0
ENSMUSG00000004665	MGI:105093	Cnn2	1	0	0	0	0
ENSMUSG00000004791	MGI:105095	Pgf	1	1	0	0	0
ENSMUSG00000001300	MGI:105097	Efnb2	1	0	1	0	0
ENSMUSG00000025326	MGI:105098	Ube3a	1	0	0	0	0
ENSMUSG00000029718	MGI:105099	Pcolce	1	1	1	1	0
ENSMUSG00000034101	MGI:105100	Ctnnd1	1	1	0	0	0
ENSMUSG00000018339	MGI:105102	Gpx3	1	0	1	0	0
ENSMUSG00000032860	MGI:105107	P2ry2	1	1	1	1	0
ENSMUSG00000021068	MGI:105108	Nin	1	1	0	0	0
ENSMUSG00000044533	MGI:105110	Rps2	1	1	0	0	0
ENSMUSG00000024190	MGI:105120	Dusp1	1	0	0	0	0
ENSMUSG00000015461	MGI:105121	Atf6b	1	0	1	0	1
ENSMUSG00000032116	MGI:105124	Stt3a	1	0	1	1	1
ENSMUSG00000003813	MGI:105126	Rad23a	0	1	0	1	1
ENSMUSG00000028426	MGI:105128	Rad23b	1	1	1	1	0
ENSMUSG00000001918	MGI:105305	Slc1a5	1	0	0	1	1
ENSMUSG00000019173	MGI:105306	Rab5c	1	0	0	0	0
ENSMUSG00000038764	MGI:105307	Ptpn3	1	0	0	0	0
ENSMUSG00000022203	MGI:105311	Efs	0	0	1	0	1
ENSMUSG00000029516	MGI:105313	Cit	1	0	1	0	0
ENSMUSG00000030748	MGI:105367	Il4ra	1	0	1	0	0
ENSMUSG00000018666	MGI:105369	Cbx1	0	0	0	0	1
ENSMUSG00000021466	MGI:105373	Ptch1	1	0	0	1	0
ENSMUSG00000031555	MGI:105376	Adam9	1	1	1	1	1
ENSMUSG00000011256	MGI:105377	Adam19	1	1	0	0	0
ENSMUSG00000054555	MGI:105378	Adam12	1	1	1	0	0
ENSMUSG00000002870	MGI:105380	Mcm2	1	1	1	1	1
ENSMUSG00000032518	MGI:105381	Rpsa	1	0	0	0	0
ENSMUSG00000015647	MGI:105382	Lama5	1	0	1	1	0
ENSMUSG00000015656	MGI:105384	Hspa8	1	1	1	1	1
ENSMUSG00000000340	MGI:105386	Dbt	1	0	0	0	0
ENSMUSG00000028551	MGI:105388	Cdkn2c	1	0	0	0	0
ENSMUSG00000001248	MGI:105490	Gramd1a	1	1	1	1	1
ENSMUSG00000030682	MGI:105491	Cdipt	1	0	0	0	0
ENSMUSG00000033039	MGI:105870	Micall1	1	0	0	1	1
ENSMUSG00000000127	MGI:105917	Fer	1	1	0	0	0
ENSMUSG00000031616	MGI:105923	Ednra	1	0	0	0	1
ENSMUSG00000033022	MGI:105925	Cdo1	1	0	0	0	0
ENSMUSG00000017831	MGI:105926	Rab5a	1	1	1	1	1
ENSMUSG00000064181	MGI:105933	Rab3ip	1	1	0	0	0
ENSMUSG00000000711	MGI:105938	Rab5b	1	0	0	0	0
ENSMUSG00000053841	MGI:105968	Txlna	1	1	1	1	1
ENSMUSG00000034593	MGI:105976	Myo5a	1	0	0	0	0
ENSMUSG00000031706	MGI:105982	Rfx1	1	1	0	1	1
ENSMUSG00000021957	MGI:105992	Tkt	1	0	1	0	1
ENSMUSG00000027712	MGI:106008	Anxa5	1	1	1	1	0
ENSMUSG00000032085	MGI:106012	Tagln	1	0	0	1	0
ENSMUSG00000032902	MGI:106013	Slc16a1	1	0	1	1	0
ENSMUSG00000028851	MGI:106014	Nudc	1	1	0	1	1
ENSMUSG00000024248	MGI:106015	Cox7a2l	1	1	1	1	1
ENSMUSG00000022858	MGI:106016	Tra2b	1	0	0	0	0
ENSMUSG00000060938	MGI:106022	Rpl26	0	0	1	0	0
ENSMUSG00000002233	MGI:106028	Rhoc	1	0	1	0	0
ENSMUSG00000031004	MGI:106035	Mki67	1	1	0	0	0
ENSMUSG00000024302	MGI:106039	Dtna	1	0	0	0	0
ENSMUSG00000001467	MGI:106040	Cyp51	1	1	0	1	0
ENSMUSG00000021178	MGI:106054	Psmc1	1	0	0	0	0
ENSMUSG00000029147	MGI:106065	Ppm1g	1	0	0	0	0
ENSMUSG00000028312	MGI:106067	Smc2	1	1	0	0	0
ENSMUSG00000032314	MGI:106092	Etfa	1	0	0	0	0
ENSMUSG00000032334	MGI:106096	Loxl1	1	1	0	0	0
ENSMUSG00000004610	MGI:106098	Etfb	0	1	0	0	0
ENSMUSG00000027809	MGI:106100	Etfdh	1	0	0	1	0
ENSMUSG00000020312	MGI:106180	Shc2	1	1	0	0	0
ENSMUSG00000040463	MGI:106181	Mybbp1a	1	0	0	0	0
ENSMUSG00000057113	MGI:106184	Npm1	1	0	0	0	1
ENSMUSG00000024962	MGI:106199	Vegfb	1	0	0	0	0
ENSMUSG00000032180	MGI:106201	Tmed1	1	0	0	0	0
ENSMUSG00000027660	MGI:106203	Skil	1	0	0	0	0
ENSMUSG00000025810	MGI:106206	Nrp1	1	1	0	1	1
ENSMUSG00000021103	MGI:106207	Mnat1	1	0	0	1	0
ENSMUSG00000025001	MGI:106209	Hells	1	0	0	0	0
ENSMUSG00000006699	MGI:106211	Cdc42	1	1	0	0	0
ENSMUSG00000046380	MGI:106214	Jrk	1	1	1	1	1
ENSMUSG00000044217	MGI:106215	Aqp5	1	0	0	0	0
ENSMUSG00000015733	MGI:106222	Capza2	1	0	0	1	1
ENSMUSG00000070372	MGI:106227	Capza1	1	1	1	1	0
ENSMUSG00000024735	MGI:106247	Prpf19	1	0	0	0	0
ENSMUSG00000046324	MGI:106250	Ermp1	1	0	0	0	0
ENSMUSG00000041360	MGI:106253	D19Bwg1357e	1	0	0	0	0
ENSMUSG00000024277	MGI:106271	Mapre2	1	0	1	0	0
ENSMUSG00000071074	MGI:106280	Yipf3	0	0	0	1	1
ENSMUSG00000056692	MGI:106281	D17Wsu92e	1	1	0	1	0
ENSMUSG00000020561	MGI:106292	Twistnb	0	0	1	1	0
ENSMUSG00000022752	MGI:106295	Tomm70a	1	1	1	1	0
ENSMUSG00000039738	MGI:106299	Slx4	1	1	0	0	0
ENSMUSG00000022241	MGI:106314	Tars	1	0	0	0	0
ENSMUSG00000033499	MGI:106330	Larp4b	1	1	1	0	1
ENSMUSG00000021598	MGI:106331	Med10	0	0	1	1	0
ENSMUSG00000037896	MGI:106340	Rcor1	1	0	0	0	0
ENSMUSG00000022956	MGI:106341	Atp5o	1	0	1	0	0
ENSMUSG00000041629	MGI:106351	D11Wsu99e	1	0	0	0	0
ENSMUSG00000041623	MGI:106356	D11Wsu47e	1	1	0	0	0
ENSMUSG00000069844	MGI:106362	Sco1	1	0	0	0	0
ENSMUSG00000041164	MGI:106374	Zmiz2	1	1	0	0	1
ENSMUSG00000025409	MGI:106378	Mbd6	1	0	0	0	0
ENSMUSG00000001783	MGI:106379	D10Wsu52e	0	1	0	0	0
ENSMUSG00000020255	MGI:106381	D10Wsu102e	1	1	0	0	0
ENSMUSG00000003346	MGI:106388	Fam108a	1	0	0	0	0
ENSMUSG00000039835	MGI:106390	Nhsl1	1	0	0	0	0
ENSMUSG00000039485	MGI:106393	Tspyl4	1	0	0	0	0
ENSMUSG00000032328	MGI:106402	Tmem30a	1	0	1	1	1
ENSMUSG00000032388	MGI:106403	Spg21	1	1	1	1	1
ENSMUSG00000052488	MGI:106417	Cherp	0	1	1	1	0
ENSMUSG00000031703	MGI:106419	Itfg1	1	1	0	1	0
ENSMUSG00000030967	MGI:106441	Zranb1	1	0	0	1	0
ENSMUSG00000024104	MGI:106463	D6Wsu116e	1	1	1	1	1
ENSMUSG00000029726	MGI:106477	Mepce	1	0	0	0	0
ENSMUSG00000056076	MGI:106478	Eif3b	1	1	1	0	0
ENSMUSG00000044221	MGI:106479	Grsf1	1	0	1	0	0
ENSMUSG00000029291	MGI:106484	Rufy3	1	0	1	0	0
ENSMUSG00000037266	MGI:106498	D4Wsu53e	1	0	1	0	0
ENSMUSG00000060288	MGI:106499	Ppih	1	0	0	0	0
ENSMUSG00000040659	MGI:106504	Efhd2	1	0	0	1	1
ENSMUSG00000042408	MGI:106505	Zmym6	1	0	1	1	1
ENSMUSG00000029022	MGI:106506	Miip	1	1	1	1	0
ENSMUSG00000048706	MGI:106510	D4Bwg0951e	1	1	0	0	0
ENSMUSG00000028675	MGI:106512	Pnrc2	1	1	1	1	0
ENSMUSG00000039660	MGI:106544	D2Wsu81e	1	0	0	0	0
ENSMUSG00000034723	MGI:106558	Tmx4	1	0	0	0	0
ENSMUSG00000075467	MGI:106559	Dnlz	1	0	1	1	0
ENSMUSG00000017734	MGI:106562	Dbndd2	1	0	0	0	0
ENSMUSG00000039069	MGI:106565	Gtpbp5	1	0	0	0	0
ENSMUSG00000026127	MGI:106572	Imp4	1	1	0	1	0
ENSMUSG00000032997	MGI:106576	Chpf	1	0	1	1	1
ENSMUSG00000003135	MGI:106580	D1Bwg0212e	1	1	0	0	0
ENSMUSG00000014402	MGI:106581	Tsg101	1	1	0	0	0
ENSMUSG00000028634	MGI:106589	Hivep3	1	0	0	0	0
ENSMUSG00000003665	MGI:106590	Has1	1	1	1	0	0
ENSMUSG00000045827	MGI:106603	Serpinb9	0	1	0	0	0
ENSMUSG00000021340	MGI:106604	Gpld1	1	1	0	0	0
ENSMUSG00000017774	MGI:106612	Myo1c	1	1	1	1	1
ENSMUSG00000020888	MGI:106613	Dvl2	1	1	0	0	0
ENSMUSG00000032220	MGI:106621	Myo1e	1	1	0	1	1
ENSMUSG00000004677	MGI:106624	Myo9b	1	1	1	1	0
ENSMUSG00000037887	MGI:106626	Dusp8	1	0	0	0	0
ENSMUSG00000029009	MGI:106639	Mthfr	1	1	1	1	0
ENSMUSG00000022587	MGI:106651	Ly6e	1	0	1	0	1
ENSMUSG00000018199	MGI:106652	Trove2	1	0	1	1	1
ENSMUSG00000015605	MGI:106658	Srf	1	0	1	1	1
ENSMUSG00000026980	MGI:106662	Ly75	1	1	0	1	0
ENSMUSG00000027335	MGI:106673	Adra1d	1	0	0	0	0
ENSMUSG00000032667	MGI:106687	Pon2	1	0	1	1	0
ENSMUSG00000030353	MGI:106907	Tead4	1	1	0	0	1
ENSMUSG00000004865	MGI:106908	Srpk1	1	1	0	0	0
ENSMUSG00000021771	MGI:106915	Vdac2	1	1	1	1	1
ENSMUSG00000054733	MGI:106916	Msra	1	0	0	1	0
ENSMUSG00000021109	MGI:106918	Hif1a	0	1	1	1	0
ENSMUSG00000020402	MGI:106919	Vdac1	1	1	1	0	1
ENSMUSG00000019961	MGI:106920	Tmpo	1	0	0	0	0
ENSMUSG00000008892	MGI:106922	Vdac3	1	0	0	0	0
ENSMUSG00000053626	MGI:106923	Tll1	1	0	1	0	0
ENSMUSG00000035683	MGI:106924	Melk	1	0	0	0	1
ENSMUSG00000028158	MGI:106926	Mttp	1	0	0	0	0
ENSMUSG00000042557	MGI:107157	Sin3a	1	0	1	1	1
ENSMUSG00000031622	MGI:107158	Sin3b	1	0	0	0	0
ENSMUSG00000022092	MGI:107162	Ppp3cc	1	0	0	1	0
ENSMUSG00000021816	MGI:107163	Ppp3cb	1	0	0	0	0
ENSMUSG00000028161	MGI:107164	Ppp3ca	1	0	0	0	0
ENSMUSG00000032411	MGI:107167	Tfdp2	1	0	1	0	0
ENSMUSG00000020897	MGI:107168	Aurkb	1	0	0	1	0
ENSMUSG00000009549	MGI:107169	Srp14	1	1	1	1	1
ENSMUSG00000033953	MGI:107172	Ppp3r1	1	0	1	0	0
ENSMUSG00000024912	MGI:107179	Fosl1	1	1	0	0	1
ENSMUSG00000036461	MGI:107180	Elf1	1	1	0	0	0
ENSMUSG00000025613	MGI:107183	Cct8	1	0	0	0	0
ENSMUSG00000030007	MGI:107184	Cct7	0	1	0	0	0
ENSMUSG00000022234	MGI:107185	Cct5	1	1	0	1	0
ENSMUSG00000034024	MGI:107186	Cct2	1	1	0	0	0
ENSMUSG00000022508	MGI:107187	Bcl6	1	0	0	0	0
ENSMUSG00000015709	MGI:107188	Arnt2	1	0	1	1	0
ENSMUSG00000052430	MGI:107191	Bmpr1b	1	0	1	1	0
ENSMUSG00000025150	MGI:107200	Cbr2	1	0	0	0	0
ENSMUSG00000034218	MGI:107202	Atm	1	0	0	0	0
ENSMUSG00000030652	MGI:107207	Coq7	1	1	0	1	0
ENSMUSG00000034345	MGI:107227	Gtf2h5	1	0	1	0	0
ENSMUSG00000022770	MGI:107231	Dlg1	1	1	1	0	1
ENSMUSG00000022538	MGI:107236	Lsg1	1	1	1	0	0
ENSMUSG00000007589	MGI:107246	Tinf2	1	1	0	0	0
ENSMUSG00000021595	MGI:107252	Nsun2	1	1	1	1	1
ENSMUSG00000020841	MGI:107265	Cpd	1	1	0	0	0
ENSMUSG00000025241	MGI:107277	Fyco1	1	1	0	1	0
ENSMUSG00000032199	MGI:107282	Grinl1a	1	1	1	1	1
ENSMUSG00000032359	MGI:107285	Ctsh	1	1	0	0	0
ENSMUSG00000005142	MGI:107286	Man2b1	1	1	0	1	1
ENSMUSG00000030330	MGI:107307	Ing4	1	0	1	0	1
ENSMUSG00000044018	MGI:107329	Mrpl50	1	1	0	0	0
ENSMUSG00000027774	MGI:107339	Gfm1	1	1	1	0	1
ENSMUSG00000027551	MGI:107342	Zfp64	1	0	0	1	1
ENSMUSG00000027882	MGI:107362	Stxbp3a	1	0	1	0	0
ENSMUSG00000026797	MGI:107363	Stxbp1	1	1	1	0	0
ENSMUSG00000004626	MGI:107370	Stxbp2	0	0	0	1	0
ENSMUSG00000034930	MGI:107371	Rtkn	1	0	1	0	0
ENSMUSG00000026730	MGI:107372	Pter	1	0	0	0	0
ENSMUSG00000022136	MGI:107373	Dnajc3	1	1	1	1	0
ENSMUSG00000020553	MGI:107375	Pctp	1	0	1	0	0
ENSMUSG00000018287	MGI:107380	Spag7	1	0	0	0	0
ENSMUSG00000002897	MGI:107399	Il17ra	1	0	0	0	0
ENSMUSG00000026034	MGI:107403	Clk1	0	0	0	0	1
ENSMUSG00000006215	MGI:107410	Zbtb17	1	1	1	1	0
ENSMUSG00000027011	MGI:107412	Ube2e3	1	0	0	0	0
ENSMUSG00000027953	MGI:107417	Slc50a1	1	0	0	0	0
ENSMUSG00000035382	MGI:107421	Pcsk7	1	0	0	1	0
ENSMUSG00000025757	MGI:107422	Hspa4l	1	0	0	0	0
ENSMUSG00000021224	MGI:107423	Numb	1	0	0	0	0
ENSMUSG00000073889	MGI:107426	Il11ra1	0	0	1	0	1
ENSMUSG00000022144	MGI:107430	Gdnf	1	0	0	0	0
ENSMUSG00000039385	MGI:107435	Cdh6	0	0	1	1	0
ENSMUSG00000022321	MGI:107436	Cdh10	0	0	0	1	0
ENSMUSG00000036707	MGI:107438	Cab39	1	0	0	0	0
ENSMUSG00000039781	MGI:107440	Azi1	1	0	0	0	0
ENSMUSG00000020664	MGI:107450	Dld	1	0	0	0	0
ENSMUSG00000020937	MGI:107451	Plcd3	1	1	0	0	0
ENSMUSG00000039943	MGI:107464	Plcb4	1	0	0	0	0
ENSMUSG00000026173	MGI:107469	Plcd4	1	0	0	0	0
ENSMUSG00000067367	MGI:107470	Lyar	1	0	0	0	0
ENSMUSG00000029084	MGI:107474	Cd38	1	0	0	0	0
ENSMUSG00000030987	MGI:107476	Stim1	1	0	1	1	1
ENSMUSG00000028718	MGI:107477	Stil	1	0	0	0	1
ENSMUSG00000041354	MGI:107483	Rgl2	1	1	1	0	0
ENSMUSG00000026482	MGI:107484	Rgl1	0	0	1	0	1
ENSMUSG00000026821	MGI:107485	Ralgds	1	0	0	0	0
ENSMUSG00000040374	MGI:107486	Pxmp3	1	0	0	0	0
ENSMUSG00000034868	MGI:107494	Myl12b	1	1	1	0	1
ENSMUSG00000029377	MGI:107508	Ereg	1	1	1	1	0
ENSMUSG00000075602	MGI:107527	Ly6a	1	1	1	0	1
ENSMUSG00000001440	MGI:107532	Kpnb1	1	0	0	0	0
ENSMUSG00000055991	MGI:107533	Zkscan5	1	1	1	1	0
ENSMUSG00000030720	MGI:107537	Cln3	1	0	1	0	0
ENSMUSG00000026637	MGI:107548	Traf5	0	0	0	1	0
ENSMUSG00000042043	MGI:107549	Tbca	1	0	0	0	0
ENSMUSG00000028780	MGI:107557	Sema3c	1	0	0	1	0
ENSMUSG00000028883	MGI:107558	Sema3a	1	1	0	1	0
ENSMUSG00000030539	MGI:107559	Sema4b	1	0	0	1	1
ENSMUSG00000025402	MGI:107563	Nab2	1	0	0	0	0
ENSMUSG00000002881	MGI:107564	Nab1	1	1	1	0	1
ENSMUSG00000026585	MGI:107566	Kifap3	1	0	0	0	0
ENSMUSG00000046879	MGI:107567	Irgm1	0	1	0	0	0
ENSMUSG00000000058	MGI:107571	Cav2	1	1	1	0	0
ENSMUSG00000056917	MGI:107576	Sipa1	1	1	0	0	0
ENSMUSG00000047731	MGI:107577	D19Wsu162e	1	0	1	1	1
ENSMUSG00000022463	MGI:107585	Srebf2	1	0	0	0	0
ENSMUSG00000002325	MGI:107587	Irf9	1	0	0	0	0
ENSMUSG00000033054	MGI:107605	Npat	1	0	0	0	0
ENSMUSG00000020538	MGI:107606	Srebf1	1	0	0	1	0
ENSMUSG00000055305	MGI:107611	Zfp93	0	0	1	0	0
ENSMUSG00000004371	MGI:107613	Il11	1	0	0	0	0
ENSMUSG00000056305	MGI:107622	Usp39	1	0	0	0	0
ENSMUSG00000041939	MGI:107624	Mvk	1	0	1	1	0
ENSMUSG00000057637	MGI:107628	Prdm2	1	1	0	1	0
ENSMUSG00000001089	MGI:107629	Luzp1	1	1	0	0	0
ENSMUSG00000047557	MGI:107633	Lxn	1	0	0	0	0
ENSMUSG00000027968	MGI:107634	Larp7	1	0	0	1	0
ENSMUSG00000026750	MGI:107637	Psmb7	1	0	0	0	0
ENSMUSG00000006057	MGI:107653	Atp5g1	1	0	0	0	1
ENSMUSG00000022965	MGI:107654	Ifngr2	1	0	0	0	0
ENSMUSG00000020009	MGI:107655	Ifngr1	1	1	0	0	0
ENSMUSG00000022967	MGI:107658	Ifnar1	1	0	0	0	0
ENSMUSG00000029762	MGI:107673	Akr1b8	1	1	0	0	0
ENSMUSG00000064289	MGI:107676	Tank	1	0	0	0	0
ENSMUSG00000026640	MGI:107684	Plxna2	1	0	1	0	0
ENSMUSG00000030084	MGI:107685	Plxna1	1	1	1	1	1
ENSMUSG00000029632	MGI:107686	Ndufa4	1	0	0	0	0
ENSMUSG00000032717	MGI:107687	Mdfi	1	0	1	1	0
ENSMUSG00000027475	MGI:107688	Kif3b	1	1	0	0	1
ENSMUSG00000018395	MGI:107689	Kif3a	1	0	0	0	0
ENSMUSG00000060206	MGI:107690	Zfp462	1	1	1	1	1
ENSMUSG00000060376	MGI:107701	Bckdha	1	0	0	0	0
ENSMUSG00000024030	MGI:107704	Abcg1	1	0	1	1	1
ENSMUSG00000037013	MGI:107708	Ss18	1	0	0	0	1
ENSMUSG00000022272	MGI:107716	Myo10	1	1	0	1	0
ENSMUSG00000022443	MGI:107717	Myh9	1	1	1	0	0
ENSMUSG00000002052	MGI:107726	Supt6h	1	1	0	0	0
ENSMUSG00000035441	MGI:107728	Myo1d	1	1	0	0	0
ENSMUSG00000025410	MGI:107733	Dctn2	1	1	0	0	0
ENSMUSG00000020198	MGI:107734	Ap3d1	1	1	0	0	0
ENSMUSG00000039585	MGI:107735	Myo9a	1	0	0	0	0
ENSMUSG00000035770	MGI:107738	Dync1li2	1	1	0	0	0
ENSMUSG00000031628	MGI:107739	Casp3	1	0	1	1	0
ENSMUSG00000040511	MGI:107741	Pvr	1	1	1	1	0
ENSMUSG00000031865	MGI:107745	Dctn1	1	1	1	0	1
ENSMUSG00000027506	MGI:107749	Tpd52	1	1	0	0	0
ENSMUSG00000027012	MGI:107750	Dync1i2	0	0	0	0	1
ENSMUSG00000018417	MGI:107752	Myo1b	1	1	1	1	0
ENSMUSG00000040888	MGI:107757	Gfer	1	1	1	1	1
ENSMUSG00000024843	MGI:107760	Chka	1	1	0	0	0
ENSMUSG00000037032	MGI:107765	Apbb1	1	1	0	0	0
ENSMUSG00000071281	MGI:107769	Zfp71-rs1	0	0	1	1	1
ENSMUSG00000017631	MGI:107771	Abr	1	1	1	1	0
ENSMUSG00000057551	MGI:107775	Zfp317	1	0	0	0	0
ENSMUSG00000015312	MGI:107776	Gadd45b	1	1	0	0	0
ENSMUSG00000022890	MGI:107777	Atp5j	1	0	1	0	0
ENSMUSG00000046185	MGI:107780	Zfp84	1	0	1	1	1
ENSMUSG00000032412	MGI:107788	Atp1b3	1	1	1	0	0
ENSMUSG00000068328	MGI:107789	Aup1	1	0	1	0	0
ENSMUSG00000060373	MGI:107795	Hnrnpc	0	0	1	1	0
ENSMUSG00000028743	MGI:107796	Akr7a5	1	1	0	0	0
ENSMUSG00000036390	MGI:107799	Gadd45a	1	0	1	0	1
ENSMUSG00000025393	MGI:107801	Atp5b	1	0	0	0	0
ENSMUSG00000044894	MGI:107807	Uqcrq	0	1	0	0	1
ENSMUSG00000006299	MGI:107809	Aamp	1	0	0	0	0
ENSMUSG00000003923	MGI:107810	Tfam	1	0	0	0	0
ENSMUSG00000001525	MGI:107812	Tubb5	0	1	1	1	1
ENSMUSG00000026409	MGI:107815	Pfkfb2	1	0	0	0	0
ENSMUSG00000020695	MGI:107818	Mrc2	1	0	0	1	1
ENSMUSG00000022367	MGI:107821	Has2	1	1	1	0	0
ENSMUSG00000028111	MGI:107823	Ctsk	1	0	0	0	1
ENSMUSG00000025473	MGI:107825	Adam8	1	0	0	1	0
ENSMUSG00000052429	MGI:107846	Prmt1	1	0	0	0	0
ENSMUSG00000037916	MGI:107851	Ndufv1	1	0	0	0	0
ENSMUSG00000050761	MGI:107852	Gp1bb	1	0	0	0	0
ENSMUSG00000003527	MGI:107854	Dgcr14	1	0	0	0	0
ENSMUSG00000058672	MGI:107861	Tubb2a	1	0	0	0	0
ENSMUSG00000025869	MGI:107862	Nop16	1	0	0	0	0
ENSMUSG00000025651	MGI:107876	Uqcrc1	1	0	0	0	0
ENSMUSG00000003402	MGI:107877	Prkcsh	1	0	0	0	0
ENSMUSG00000032777	MGI:107887	Gtf3c1	1	0	1	0	0
ENSMUSG00000061286	MGI:107889	Exosc5	1	0	0	0	1
ENSMUSG00000038279	MGI:107891	Nop2	1	1	0	0	1
ENSMUSG00000029672	MGI:107892	Fam3c	1	1	0	0	0
ENSMUSG00000030347	MGI:107893	D6Wsu163e	1	1	0	0	0
ENSMUSG00000075703	MGI:107898	Ept1	1	1	0	0	0
ENSMUSG00000032897	MGI:107901	Nfyc	1	0	0	0	0
ENSMUSG00000030846	MGI:107913	Tial1	0	0	0	1	0
ENSMUSG00000071337	MGI:107914	Tia1	1	0	0	0	0
ENSMUSG00000020580	MGI:107926	Rock2	1	1	1	1	1
ENSMUSG00000024290	MGI:107927	Rock1	1	0	0	1	0
ENSMUSG00000028126	MGI:107929	Pip5k1a	1	0	0	0	0
ENSMUSG00000015837	MGI:107931	Sqstm1	1	0	1	0	0
ENSMUSG00000021606	MGI:107932	Ndufs6	1	1	0	0	1
ENSMUSG00000032221	MGI:107933	Mns1	1	0	0	0	0
ENSMUSG00000054387	MGI:107934	Mdm4	1	0	0	0	0
ENSMUSG00000030029	MGI:107935	Lrig1	1	1	1	1	1
ENSMUSG00000026492	MGI:107937	Tfb2m	1	1	0	0	0
ENSMUSG00000029687	MGI:107940	Ezh2	1	0	0	0	0
ENSMUSG00000030208	MGI:107941	Emp1	1	1	1	1	1
ENSMUSG00000029447	MGI:107943	Cct6a	1	0	0	1	1
ENSMUSG00000045817	MGI:107945	Zfp36l2	1	1	0	0	0
ENSMUSG00000021127	MGI:107946	Zfp36l1	1	0	0	0	0
ENSMUSG00000054364	MGI:107949	Rhob	1	1	1	0	0
ENSMUSG00000024862	MGI:107953	Klc2	0	1	0	0	1
ENSMUSG00000054640	MGI:107956	Slc8a1	1	0	0	0	0
ENSMUSG00000021288	MGI:107978	Klc1	1	1	1	0	0
ENSMUSG00000020668	MGI:107979	Kif3c	1	0	0	0	0
ENSMUSG00000058301	MGI:107995	Upf1	1	1	1	1	0
ENSMUSG00000032508	MGI:108005	Myd88	1	1	0	0	0
ENSMUSG00000027395	MGI:108014	Polr1b	1	1	1	1	1
ENSMUSG00000022314	MGI:108016	Rad21	1	1	0	1	1
ENSMUSG00000002064	MGI:108019	Sdf2	1	1	0	0	0
ENSMUSG00000057672	MGI:108022	Pkn1	1	1	0	1	1
ENSMUSG00000032601	MGI:108025	Prkar2a	1	0	0	0	0
ENSMUSG00000032409	MGI:108028	Atr	0	0	1	0	0
ENSMUSG00000032115	MGI:108030	Hyou1	1	0	0	1	1
ENSMUSG00000021277	MGI:108041	Traf3	1	1	0	0	0
ENSMUSG00000033706	MGI:108048	Smyd5	0	1	0	0	0
ENSMUSG00000027198	MGI:108050	Ext2	1	0	0	0	1
ENSMUSG00000024563	MGI:108051	Smad2	1	1	1	0	0
ENSMUSG00000089682	MGI:108052	Bcl2l2	0	0	1	1	0
ENSMUSG00000028057	MGI:108053	Rit1	1	0	0	0	0
ENSMUSG00000030790	MGI:108058	Adm	0	0	0	0	1
ENSMUSG00000029428	MGI:108059	Stx2	1	1	1	0	1
ENSMUSG00000022996	MGI:108061	Wnt10b	1	0	0	0	0
ENSMUSG00000036432	MGI:108062	Siah2	0	0	0	0	1
ENSMUSG00000027715	MGI:108069	Ccna2	0	0	1	1	1
ENSMUSG00000030393	MGI:108070	Zik1	0	0	1	0	0
ENSMUSG00000027164	MGI:108072	Traf6	1	0	0	0	0
ENSMUSG00000021036	MGI:108074	Sptlc2	1	0	0	0	0
ENSMUSG00000001761	MGI:108075	Smo	1	0	1	1	1
ENSMUSG00000033386	MGI:108076	Frrs1	1	1	1	1	1
ENSMUSG00000032336	MGI:108077	Nptn	1	0	0	0	0
ENSMUSG00000029076	MGI:108079	Sdf4	1	0	0	0	0
ENSMUSG00000000753	MGI:108080	Serpinf1	1	1	0	0	0
ENSMUSG00000020570	MGI:108081	Sypl	1	1	0	1	0
ENSMUSG00000038241	MGI:108084	Cep250	1	1	1	1	0
ENSMUSG00000028800	MGI:108086	Hdac1	1	1	1	1	1
ENSMUSG00000001380	MGI:108087	Hars	1	1	1	1	1
ENSMUSG00000031714	MGI:108088	Gab1	1	0	0	0	0
ENSMUSG00000062762	MGI:108090	Ei24	1	0	1	1	0
ENSMUSG00000031955	MGI:108091	Bcar1	1	1	0	0	0
ENSMUSG00000024381	MGI:108092	Bin1	1	0	0	1	0
ENSMUSG00000004446	MGI:108093	Bid	1	0	0	1	1
ENSMUSG00000003233	MGI:108100	Dvl3	1	0	0	0	0
ENSMUSG00000051391	MGI:108109	Ywhag	1	0	0	0	0
ENSMUSG00000052920	MGI:108174	Prkg1	1	0	0	0	0
ENSMUSG00000053198	MGI:108176	Prx	0	0	0	1	0
ENSMUSG00000042699	MGI:108177	Dhx9	1	1	0	0	1
ENSMUSG00000007338	MGI:108180	Mrpl49	1	1	0	0	1
ENSMUSG00000053644	MGI:108186	Aldh7a1	1	1	1	1	0
ENSMUSG00000067942	MGI:108187	Zfp160	0	0	1	0	0
ENSMUSG00000021408	MGI:108212	Ripk1	1	1	0	0	0
ENSMUSG00000034674	MGI:108247	Tdg	1	1	1	1	1
ENSMUSG00000029528	MGI:108295	Pxn	1	0	1	1	0
ENSMUSG00000022995	MGI:108360	Enah	1	0	1	0	0
ENSMUSG00000020423	MGI:108384	Btg2	1	0	0	0	0
ENSMUSG00000049091	MGI:108388	Sephs2	1	0	0	0	0
ENSMUSG00000021693	MGI:108390	Kif2a	1	0	1	0	0
ENSMUSG00000014602	MGI:108391	Kif1a	1	1	1	1	0
ENSMUSG00000027397	MGI:108392	Slc20a1	1	1	0	0	0
ENSMUSG00000026281	MGI:108396	Dtymk	1	0	0	0	0
ENSMUSG00000017801	MGI:108398	Mlx	1	0	0	0	0
ENSMUSG00000041852	MGI:108399	Tcf20	1	0	0	0	0
ENSMUSG00000004642	MGI:108402	Slbp	1	0	0	0	0
ENSMUSG00000029642	MGI:108403	Polr1d	1	0	0	1	0
ENSMUSG00000001379	MGI:108404	Apbb3	0	0	1	1	0
ENSMUSG00000029207	MGI:108405	Apbb2	1	1	1	1	1
ENSMUSG00000026475	MGI:108407	Rgs16	1	1	0	0	0
ENSMUSG00000038530	MGI:108409	Rgs4	1	1	1	1	1
ENSMUSG00000067713	MGI:108411	Prkag1	1	0	0	1	0
ENSMUSG00000021759	MGI:108412	Ppap2a	1	0	1	1	1
ENSMUSG00000005447	MGI:108414	Pafah1b3	1	0	0	0	0
ENSMUSG00000003131	MGI:108415	Pafah1b2	1	0	0	1	0
ENSMUSG00000015839	MGI:108420	Nfe2l2	1	1	1	1	0
ENSMUSG00000063077	MGI:108426	Kif1b	1	1	0	1	0
ENSMUSG00000038668	MGI:108429	Lpar1	1	1	0	0	0
ENSMUSG00000025586	MGI:108442	Cpeb1	1	0	0	0	0
ENSMUSG00000041845	MGI:108446	Rhod	1	0	0	0	1
ENSMUSG00000032249	MGI:108447	Anp32a	1	1	1	1	1
ENSMUSG00000029778	MGI:108449	Adcyap1r1	0	0	1	0	0
ENSMUSG00000020532	MGI:108451	Acaca	1	0	1	1	0
ENSMUSG00000036904	MGI:108460	Fzd8	1	0	0	1	0
ENSMUSG00000024096	MGI:108466	Ralbp1	1	1	1	0	1
ENSMUSG00000022885	MGI:108470	St6gal1	1	0	0	0	0
ENSMUSG00000022681	MGI:108471	Ntan1	1	0	0	0	0
ENSMUSG00000022297	MGI:108474	Fzd6	1	0	0	1	0
ENSMUSG00000021866	MGI:108481	Anxa11	1	1	0	0	0
ENSMUSG00000017119	MGI:108498	Nbr1	1	0	1	1	1
ENSMUSG00000029836	MGI:108515	Cbx3	1	0	0	0	0
ENSMUSG00000031024	MGI:108517	St5	1	0	1	0	1
ENSMUSG00000041420	MGI:108519	Meis3	1	1	1	1	1
ENSMUSG00000029664	MGI:108543	Tfpi2	1	0	1	0	0
ENSMUSG00000028649	MGI:108559	Macf1	1	1	0	1	1
ENSMUSG00000037902	MGI:108563	Sirpa	0	0	1	1	0
ENSMUSG00000041075	MGI:108570	Fzd7	1	0	1	0	1
ENSMUSG00000045005	MGI:108571	Fzd5	1	0	1	1	1
ENSMUSG00000031520	MGI:109124	Vegfc	1	0	0	0	0
ENSMUSG00000022010	MGI:109127	Tsc22d1	1	1	1	1	0
ENSMUSG00000036980	MGI:109129	Taf6	1	0	0	1	0
ENSMUSG00000024966	MGI:109130	Stip1	1	0	0	0	0
ENSMUSG00000029126	MGI:109149	Nsg1	1	0	1	0	0
ENSMUSG00000000282	MGI:109150	Mnt	1	1	0	1	1
ENSMUSG00000001870	MGI:109151	Ltbp1	1	1	1	1	0
ENSMUSG00000020697	MGI:109152	Lig3	1	1	0	0	0
ENSMUSG00000021843	MGI:109153	Ktn1	1	1	1	1	1
ENSMUSG00000027827	MGI:109155	Kcnab1	1	1	1	1	0
ENSMUSG00000003228	MGI:109161	Grk5	1	1	0	1	0
ENSMUSG00000024978	MGI:109162	Gpam	1	0	0	0	0
ENSMUSG00000063594	MGI:109163	Gng8	1	0	0	0	0
ENSMUSG00000062661	MGI:109166	Ncs1	1	1	1	0	1
ENSMUSG00000070047	MGI:109168	Fat1	1	1	0	0	0
ENSMUSG00000024140	MGI:109169	Epas1	1	0	1	0	0
ENSMUSG00000022150	MGI:109175	Dab2	1	0	0	0	0
ENSMUSG00000028607	MGI:109176	Cpt2	1	0	0	0	0
ENSMUSG00000032679	MGI:109177	Cd59a	1	1	1	1	1
ENSMUSG00000037362	MGI:109185	Nov	1	0	0	0	0
ENSMUSG00000022629	MGI:109188	Kif21a	1	0	0	0	0
ENSMUSG00000018965	MGI:109194	Ywhah	1	0	0	0	0
ENSMUSG00000020091	MGI:109198	Eif4ebp2	1	0	0	0	0
ENSMUSG00000031887	MGI:109200	Tradd	1	0	0	0	0
ENSMUSG00000031788	MGI:109202	Kifc3	1	1	1	1	1
ENSMUSG00000005610	MGI:109207	Eif4g2	1	0	1	0	0
ENSMUSG00000030677	MGI:109233	Kif22	1	0	0	0	0
ENSMUSG00000038855	MGI:109235	Itpkb	1	0	0	0	0
ENSMUSG00000042541	MGI:109238	Shfm1	1	0	0	1	0
ENSMUSG00000038965	MGI:109240	Ube2l3	1	0	0	0	0
ENSMUSG00000002249	MGI:109241	Tead3	1	1	0	0	0
ENSMUSG00000021395	MGI:109242	Spin1	1	0	0	0	0
ENSMUSG00000022893	MGI:109249	Adamts1	1	1	0	1	1
ENSMUSG00000026121	MGI:109252	Sema4c	1	1	0	0	0
ENSMUSG00000021645	MGI:109257	Smn1	1	0	0	0	0
ENSMUSG00000020289	MGI:109258	Nprl3	1	1	1	0	0
ENSMUSG00000026374	MGI:109263	Tsn	1	0	1	1	1
ENSMUSG00000022156	MGI:109265	Gzme	1	0	0	0	0
ENSMUSG00000030403	MGI:109268	Vasp	1	0	0	0	0
ENSMUSG00000022361	MGI:109271	Zhx1	1	0	0	0	0
ENSMUSG00000005566	MGI:109274	Trim28	1	0	0	1	0
ENSMUSG00000029833	MGI:109275	Trim24	1	0	0	0	0
ENSMUSG00000028698	MGI:109277	Pik3r3	1	0	0	0	0
ENSMUSG00000021390	MGI:109278	Ogn	1	0	0	0	0
ENSMUSG00000025453	MGI:109279	Nnt	1	1	1	1	0
ENSMUSG00000036639	MGI:109280	Nudt1	1	0	0	0	0
ENSMUSG00000026991	MGI:109281	Pkp4	1	0	1	0	0
ENSMUSG00000026207	MGI:109282	Speg	1	1	1	1	1
ENSMUSG00000021576	MGI:109283	Pdcd6	1	0	0	0	0
ENSMUSG00000010609	MGI:109284	Psen2	1	0	0	0	0
ENSMUSG00000020380	MGI:109292	Rad50	1	0	0	0	0
ENSMUSG00000022351	MGI:109296	Sqle	1	1	0	1	0
ENSMUSG00000016528	MGI:109298	Mapkapk2	1	0	1	1	0
ENSMUSG00000021111	MGI:109301	Papola	1	0	0	0	0
ENSMUSG00000090841	MGI:109318	Myl6	1	1	0	0	0
ENSMUSG00000019846	MGI:109321	Lama4	1	0	1	0	0
ENSMUSG00000031077	MGI:109324	Fadd	1	0	0	1	0
ENSMUSG00000078566	MGI:109326	Bnip3	1	0	1	0	1
ENSMUSG00000011958	MGI:109327	Bnip2	1	0	0	0	0
ENSMUSG00000024191	MGI:109328	Bnip1	1	1	1	0	0
ENSMUSG00000020844	MGI:109331	Nxn	1	1	0	1	0
ENSMUSG00000030199	MGI:109336	Etv6	1	1	1	0	0
ENSMUSG00000041147	MGI:109337	Brca2	1	0	0	0	0
ENSMUSG00000041351	MGI:109338	Rap1gap	1	0	0	0	0
ENSMUSG00000028886	MGI:109339	Eya3	1	1	1	1	1
ENSMUSG00000026427	MGI:109342	Eif2d	1	0	0	0	0
ENSMUSG00000005609	MGI:109345	Ctr9	1	0	1	0	0
ENSMUSG00000027104	MGI:109349	Atf2	1	0	0	0	0
ENSMUSG00000006576	MGI:109350	Slc4a3	1	1	1	1	0
ENSMUSG00000028962	MGI:109351	Slc4a2	1	0	0	0	0
ENSMUSG00000029591	MGI:109352	Ung	1	0	1	0	0
ENSMUSG00000005262	MGI:109353	Ufd1l	1	0	0	0	0
ENSMUSG00000033685	MGI:109354	Ucp2	1	0	0	0	0
ENSMUSG00000007207	MGI:109355	Stx1a	1	1	0	0	0
ENSMUSG00000027287	MGI:109356	Snap23	1	1	1	1	1
ENSMUSG00000026622	MGI:109359	Nek2	1	0	1	1	1
ENSMUSG00000037624	MGI:109366	Kcnk2	1	0	0	0	0
ENSMUSG00000062867	MGI:109367	Impdh2	1	0	0	0	0
ENSMUSG00000028759	MGI:109369	Hp1bp3	1	1	0	0	0
ENSMUSG00000070002	MGI:109377	Ell	1	1	1	1	0
ENSMUSG00000022969	MGI:109380	Il10rb	1	1	0	0	0
ENSMUSG00000023087	MGI:109382	Ccrn4l	1	1	0	1	0
ENSMUSG00000025076	MGI:109383	Casp7	1	0	0	0	0
ENSMUSG00000024081	MGI:109386	Cebpz	1	1	1	1	0
ENSMUSG00000063550	MGI:109404	Nup98	1	0	0	1	0
ENSMUSG00000010517	MGI:109419	Faf1	1	0	0	0	0
ENSMUSG00000053219	MGI:109431	Raet1c	1	0	0	0	0
ENSMUSG00000035242	MGI:109433	Oaz1	1	0	0	0	0
ENSMUSG00000026768	MGI:109442	Itga8	1	1	0	0	0
ENSMUSG00000042535	MGI:109443	Gtpbp1	1	1	1	1	1
ENSMUSG00000031681	MGI:109452	Smad1	1	0	0	0	0
ENSMUSG00000056342	MGI:109473	Usp34	1	1	1	0	1
ENSMUSG00000052656	MGI:109483	Rnf103	1	1	0	0	1
ENSMUSG00000022285	MGI:109484	Ywhaz	1	0	0	1	0
ENSMUSG00000005161	MGI:109486	Prdx2	1	1	0	1	1
ENSMUSG00000040652	MGI:109492	Oaz2	1	0	1	1	1
ENSMUSG00000056749	MGI:109495	Nfil3	0	1	0	1	0
ENSMUSG00000001123	MGI:109496	Lgals9	1	1	0	0	0
ENSMUSG00000026853	MGI:109501	Crat	1	1	0	0	0
ENSMUSG00000005054	MGI:109514	Cstb	1	1	1	0	0
ENSMUSG00000020745	MGI:109520	Pafah1b1	1	1	1	1	1
ENSMUSG00000034997	MGI:109521	Htr2a	0	1	0	1	0
ENSMUSG00000032839	MGI:109528	Trpc1	1	0	1	0	0
ENSMUSG00000024826	MGI:109529	Dpf2	1	0	0	0	0
ENSMUSG00000024137	MGI:109530	E4f1	1	1	1	1	1
ENSMUSG00000019471	MGI:109531	Cdc37	1	0	0	0	0
ENSMUSG00000022863	MGI:109532	Btg3	1	0	0	0	0
ENSMUSG00000040690	MGI:1095396	Col16a1	1	1	1	1	0
ENSMUSG00000022323	MGI:1095401	Hrsp12	0	0	0	1	1
ENSMUSG00000024949	MGI:1095403	Sf1	1	0	0	0	0
ENSMUSG00000067336	MGI:1095407	Bmpr2	1	1	1	0	0
ENSMUSG00000043091	MGI:1095409	Tuba1c	1	0	0	0	0
ENSMUSG00000001855	MGI:1095411	Nup214	0	0	1	0	0
ENSMUSG00000059921	MGI:1095412	Unc5c	1	0	1	0	0
ENSMUSG00000029570	MGI:1095413	Lfng	0	1	0	0	0
ENSMUSG00000028217	MGI:1095414	Cdh17	1	0	0	0	0
ENSMUSG00000027276	MGI:1095416	Jag1	1	1	1	1	1
ENSMUSG00000027082	MGI:1095418	Tfpi	0	1	0	0	0
ENSMUSG00000033335	MGI:109547	Dnm2	1	1	0	0	0
ENSMUSG00000054693	MGI:109548	Adam10	1	0	0	0	0
ENSMUSG00000028932	MGI:109555	Psmc2	0	1	0	0	1
ENSMUSG00000044337	MGI:109562	Cxcr7	1	0	0	0	0
ENSMUSG00000074657	MGI:109564	Kif5a	1	0	1	0	0
ENSMUSG00000006307	MGI:109565	Wbp7	1	0	1	1	0
ENSMUSG00000022023	MGI:109568	Wbp4	1	1	0	0	0
ENSMUSG00000023008	MGI:109569	Fmnl3	1	0	0	0	0
ENSMUSG00000005968	MGI:109572	Tuft1	1	0	1	1	1
ENSMUSG00000006281	MGI:109573	Tep1	1	1	1	1	0
ENSMUSG00000022912	MGI:1095733	Pros1	1	1	0	0	0
ENSMUSG00000031832	MGI:109576	Taf1c	1	0	0	0	0
ENSMUSG00000059669	MGI:109577	Taf1b	1	0	0	0	1
ENSMUSG00000042312	MGI:109581	S100a13	1	0	0	0	1
ENSMUSG00000013663	MGI:109583	Pten	1	0	0	0	0
ENSMUSG00000021413	MGI:109584	Prpf4b	1	1	0	0	0
ENSMUSG00000027695	MGI:109585	Pld1	1	0	0	0	0
ENSMUSG00000063727	MGI:109587	Tnfrsf11b	1	1	0	1	0
ENSMUSG00000055053	MGI:109591	Nfic	1	1	0	0	0
ENSMUSG00000023572	MGI:109595	Ccndbp1	1	1	1	1	0
ENSMUSG00000079553	MGI:109596	Kifc1	1	1	1	0	0
ENSMUSG00000032475	MGI:109601	Nck1	1	0	1	0	0
ENSMUSG00000028680	MGI:109604	Plk3	1	0	0	0	0
ENSMUSG00000026425	MGI:109605	Srgap2	1	1	1	1	0
ENSMUSG00000075415	MGI:109606	Fnbp1	1	0	0	0	0
ENSMUSG00000041773	MGI:109610	Enc1	1	1	1	1	0
ENSMUSG00000022324	MGI:109613	Matn2	1	0	0	1	0
ENSMUSG00000006273	MGI:109618	Atp6v1b2	1	1	1	1	0
ENSMUSG00000024847	MGI:109622	Aip	1	0	0	0	0
ENSMUSG00000024182	MGI:1096327	Axin1	1	1	0	1	0
ENSMUSG00000024959	MGI:1096330	Bad	1	0	0	0	0
ENSMUSG00000005357	MGI:1096331	Slc1a6	1	0	0	0	0
ENSMUSG00000052593	MGI:1096335	Adam17	1	1	1	1	1
ENSMUSG00000025925	MGI:109634	Terf1	1	0	0	1	0
ENSMUSG00000016477	MGI:1096340	E2f3	1	1	0	0	0
ENSMUSG00000007815	MGI:1096342	Rhoa	1	0	0	0	0
ENSMUSG00000005686	MGI:1096344	Ampd3	1	0	1	0	1
ENSMUSG00000034684	MGI:1096347	Sema3f	1	1	1	1	1
ENSMUSG00000031583	MGI:109635	Wrn	1	0	0	1	1
ENSMUSG00000029162	MGI:1096353	Khk	1	0	0	0	0
ENSMUSG00000045092	MGI:1096355	S1pr1	0	0	1	1	1
ENSMUSG00000025510	MGI:1096360	Cd151	1	1	0	0	0
ENSMUSG00000079197	MGI:1096365	Psme2	1	0	0	0	0
ENSMUSG00000078652	MGI:1096366	Psme3	1	0	1	1	0
ENSMUSG00000022216	MGI:1096367	Psme1	1	1	0	0	1
ENSMUSG00000009090	MGI:1096368	Ap1b1	1	1	1	1	0
ENSMUSG00000040857	MGI:109637	Erf	1	1	0	1	0
ENSMUSG00000029763	MGI:1096376	Exoc4	1	1	0	1	0
ENSMUSG00000032586	MGI:1096377	Traip	1	0	0	0	0
ENSMUSG00000025439	MGI:109638	Clns1a	1	1	1	1	1
ENSMUSG00000055116	MGI:1096381	Arntl	1	1	1	1	1
ENSMUSG00000022676	MGI:1096393	Snai2	1	0	0	0	0
ENSMUSG00000049553	MGI:1096397	Polr1a	1	1	0	0	0
ENSMUSG00000037706	MGI:1096398	Cd81	1	0	0	0	0
ENSMUSG00000062270	MGI:1096551	Morf4l1	1	1	0	0	0
ENSMUSG00000038366	MGI:109656	Lasp1	1	1	1	0	1
ENSMUSG00000025423	MGI:1096566	Pias2	1	0	0	0	0
ENSMUSG00000040813	MGI:1096570	Tex264	1	1	1	1	1
ENSMUSG00000041438	MGI:1096573	Cirh1a	1	0	0	0	0
ENSMUSG00000014748	MGI:1096575	Tex261	1	1	1	1	1
ENSMUSG00000013089	MGI:1096867	Etv5	1	1	0	0	0
ENSMUSG00000029371	MGI:1096868	Cxcl5	1	0	0	0	0
ENSMUSG00000043940	MGI:1096875	Wdfy3	1	1	1	1	1
ENSMUSG00000059363	MGI:1096879	Fxn	1	0	0	0	0
ENSMUSG00000020205	MGI:1096880	Phlda1	1	1	0	0	0
ENSMUSG00000037742	MGI:1096881	Eef1a1	1	0	0	1	0
ENSMUSG00000031778	MGI:1097153	Cx3cl1	1	0	0	0	0
ENSMUSG00000029767	MGI:1097158	Calu	1	0	0	0	0
ENSMUSG00000032340	MGI:1097159	Neo1	1	1	0	1	1
ENSMUSG00000057789	MGI:1097161	Bak1	1	1	0	1	1
ENSMUSG00000020471	MGI:1097163	Pold2	1	0	1	0	0
ENSMUSG00000071650	MGI:1097667	Ganab	1	0	0	0	0
ENSMUSG00000019777	MGI:1097691	Hdac2	1	1	0	0	0
ENSMUSG00000030271	MGI:1097693	Ogg1	1	0	1	0	1
ENSMUSG00000006920	MGI:1097695	Ezh1	1	0	0	0	0
ENSMUSG00000000359	MGI:1097696	Rem1	1	1	1	0	0
ENSMUSG00000038633	MGI:1097711	Degs1	1	0	1	0	1
ENSMUSG00000024413	MGI:1097712	Npc1	1	1	1	1	0
ENSMUSG00000030103	MGI:1097714	Bhlhe40	1	1	1	0	0
ENSMUSG00000024803	MGI:1097717	Ankrd1	1	1	1	0	0
ENSMUSG00000039936	MGI:1098211	Pik3cd	1	0	0	0	0
ENSMUSG00000020150	MGI:1098221	Gamt	1	0	0	0	0
ENSMUSG00000030346	MGI:1098224	Rad51ap1	0	0	1	0	1
ENSMUSG00000041498	MGI:1098226	Kif14	1	0	0	0	0
ENSMUSG00000045328	MGI:1098230	Cenpe	1	0	0	1	0
ENSMUSG00000012443	MGI:1098231	Kif11	1	0	0	0	0
ENSMUSG00000024423	MGI:1098233	Impact	1	1	0	1	0
ENSMUSG00000021585	MGI:1098236	Cast	1	1	0	0	0
ENSMUSG00000050382	MGI:1098239	Kif7	1	0	0	0	1
ENSMUSG00000038844	MGI:1098240	Kif16b	1	0	1	0	0
ENSMUSG00000038871	MGI:1098242	Bpgm	1	0	0	0	1
ENSMUSG00000022971	MGI:1098243	Ifnar2	1	1	0	0	0
ENSMUSG00000004849	MGI:1098244	Ap1s1	1	1	0	0	0
ENSMUSG00000005779	MGI:1098257	Psmb4	1	0	0	0	1
ENSMUSG00000036768	MGI:1098258	Kif15	1	0	0	0	0
ENSMUSG00000056737	MGI:1098259	Capg	1	0	0	0	1
ENSMUSG00000020821	MGI:1098260	Kif1c	1	1	1	1	1
ENSMUSG00000021375	MGI:1098264	Kif13a	1	1	1	1	1
ENSMUSG00000060012	MGI:1098265	Kif13b	1	0	0	0	0
ENSMUSG00000020456	MGI:1098267	Ogdh	1	1	0	0	0
ENSMUSG00000006740	MGI:1098268	Kif5b	1	0	0	1	0
ENSMUSG00000026764	MGI:1098269	Kif5c	0	0	0	1	0
ENSMUSG00000022244	MGI:1098273	Amacr	1	0	0	1	0
ENSMUSG00000022521	MGI:1098280	Crebbp	1	0	0	0	0
ENSMUSG00000020893	MGI:1098283	Per1	1	0	0	1	0
ENSMUSG00000024900	MGI:1098296	Cpt1a	1	1	0	0	0
ENSMUSG00000026678	MGI:1098434	Rgs5	1	0	0	0	1
ENSMUSG00000021975	MGI:1098533	Ints9	1	0	1	0	1
ENSMUSG00000030272	MGI:1098535	Camk1	0	1	0	0	1
ENSMUSG00000001056	MGI:1098547	Nhp2	1	0	0	0	0
ENSMUSG00000053334	MGI:1098550	Ficd	1	0	0	0	0
ENSMUSG00000020385	MGI:1098551	Clk4	1	0	0	0	0
ENSMUSG00000090523	MGI:1098566	Gypc	1	1	0	0	0
ENSMUSG00000004561	MGI:1098577	Mettl17	1	1	1	1	0
ENSMUSG00000051343	MGI:1098586	Rab11fip5	1	1	0	0	0
ENSMUSG00000033809	MGI:1098592	Alg3	1	0	0	0	0
ENSMUSG00000028256	MGI:1098600	Odf2l	1	0	0	0	0
ENSMUSG00000019303	MGI:1098610	Psmc3ip	1	0	0	0	0
ENSMUSG00000036202	MGI:1098622	Rif1	1	1	0	1	0
ENSMUSG00000036880	MGI:1098623	Acaa2	1	0	1	0	0
ENSMUSG00000028868	MGI:1098641	Wasf2	1	1	0	1	1
ENSMUSG00000041733	MGI:1098643	Coq5	1	1	1	1	1
ENSMUSG00000070056	MGI:1098644	Mfhas1	1	1	1	0	1
ENSMUSG00000033931	MGI:1098653	Rbm34	1	0	0	0	0
ENSMUSG00000037286	MGI:1098658	Stag1	1	0	1	0	0
ENSMUSG00000068917	MGI:1098669	Clk2	1	1	1	0	0
ENSMUSG00000032316	MGI:1098670	Clk3	1	0	0	0	0
ENSMUSG00000040842	MGI:1098672	D4Ertd22e	1	1	1	1	0
ENSMUSG00000029176	MGI:1098673	Anapc4	1	1	0	0	0
ENSMUSG00000027810	MGI:1098684	Eif2a	1	0	0	0	1
ENSMUSG00000025572	MGI:1098686	Tmc6	1	1	1	1	1
ENSMUSG00000057230	MGI:1098687	Aak1	1	0	1	1	0
ENSMUSG00000004937	MGI:1098703	Sgta	1	1	0	0	0
ENSMUSG00000029192	MGI:1098708	Tbc1d14	1	0	0	0	0
ENSMUSG00000021725	MGI:1098713	Parp8	1	1	1	1	0
ENSMUSG00000028420	MGI:1098718	Tmem38b	1	0	0	0	0
ENSMUSG00000022505	MGI:1098726	Emp2	1	0	0	0	0
ENSMUSG00000040212	MGI:1098729	Emp3	1	0	0	1	0
ENSMUSG00000020829	MGI:1098733	Slc46a1	1	0	0	0	0
ENSMUSG00000026199	MGI:1098746	Ankzf1	1	0	0	0	0
ENSMUSG00000078429	MGI:1098748	Ctdsp2	1	1	0	0	1
ENSMUSG00000002102	MGI:1098754	Psmc3	1	1	1	0	1
ENSMUSG00000017188	MGI:1098757	Ccdc56	1	0	0	1	1
ENSMUSG00000026039	MGI:1098767	Sgol2	1	0	0	0	0
ENSMUSG00000033883	MGI:1098769	D3Ertd254e	0	0	1	0	0
ENSMUSG00000031834	MGI:1098772	Pik3r2	1	1	1	1	0
ENSMUSG00000026939	MGI:1098773	Tmem141	1	0	0	0	0
ENSMUSG00000024856	MGI:1098779	Cdk2ap2	1	0	0	0	0
ENSMUSG00000038174	MGI:1098784	Fam126b	1	0	0	0	0
ENSMUSG00000029173	MGI:1098791	Sepsecs	1	0	1	0	0
ENSMUSG00000036990	MGI:1098801	Otud4	1	0	0	0	0
ENSMUSG00000003119	MGI:1098802	Cdk12	1	1	1	1	0
ENSMUSG00000036513	MGI:1098806	Commd2	1	0	0	0	0
ENSMUSG00000005069	MGI:1098808	Pex5	1	1	0	0	0
ENSMUSG00000024370	MGI:1098815	Cdc23	1	1	0	0	0
ENSMUSG00000026790	MGI:1098824	Odf2	1	0	1	0	0
ENSMUSG00000052852	MGI:1098827	Reep1	0	0	0	0	1
ENSMUSG00000021468	MGI:1099431	Sptlc1	1	1	1	1	0
ENSMUSG00000020272	MGI:1099439	Stk10	1	1	1	0	1
ENSMUSG00000021189	MGI:1099442	Atxn3	1	0	1	1	1
ENSMUSG00000032271	MGI:1099443	Nnmt	1	1	1	1	1
ENSMUSG00000036721	MGI:1099444	Zscan12	1	0	0	0	0
ENSMUSG00000029169	MGI:1099786	Dhx15	1	0	0	0	0
ENSMUSG00000021701	MGI:1099790	Plk2	1	1	1	0	1
ENSMUSG00000025225	MGI:1099800	Nfkb2	1	1	1	1	1
ENSMUSG00000015094	MGI:1099802	Npdc1	1	1	0	0	1
ENSMUSG00000039959	MGI:1099804	Hip1	1	1	0	0	0
ENSMUSG00000034462	MGI:1099818	Pkd2	1	1	1	0	0
ENSMUSG00000028465	MGI:1099832	Tln1	1	1	0	1	0
ENSMUSG00000040356	MGI:1099835	Skiv2l	1	1	1	0	1
ENSMUSG00000025969	MGI:1100492	Nrp2	1	1	1	1	0
ENSMUSG00000054051	MGI:1100494	Ercc6	1	1	0	0	0
ENSMUSG00000000563	MGI:1100495	Atp5f1	1	1	1	0	0
ENSMUSG00000009907	MGI:1100499	Vps4b	1	1	1	0	0
ENSMUSG00000059714	MGI:1100500	Flot1	0	0	1	1	1
ENSMUSG00000027379	MGI:1100510	Bub1	1	0	1	1	0
ENSMUSG00000031928	MGI:1100512	Mre11a	1	1	0	0	0
ENSMUSG00000020994	MGI:1100514	Pnn	1	1	0	0	0
ENSMUSG00000029265	MGI:1100515	Dr1	1	0	0	0	0
ENSMUSG00000001829	MGI:1100517	Clpb	1	1	0	0	0
ENSMUSG00000025880	MGI:1100518	Smad7	1	1	1	1	0
ENSMUSG00000022451	MGI:1100520	Twf1	1	1	0	0	0
ENSMUSG00000025532	MGI:1100818	Crcp	1	1	0	0	0
ENSMUSG00000029313	MGI:1100819	Aff1	1	1	0	0	0
ENSMUSG00000003731	MGI:1100836	Kpna6	1	1	1	1	1
ENSMUSG00000027782	MGI:1100848	Kpna4	1	0	0	0	1
ENSMUSG00000040028	MGI:1100851	Elavl1	1	0	0	1	0
ENSMUSG00000032470	MGI:1100856	Mras	0	0	1	0	0
ENSMUSG00000035547	MGI:1100859	Capn5	0	0	1	0	0
ENSMUSG00000020170	MGI:1100860	Frs2	1	1	0	0	0
ENSMUSG00000021929	MGI:1100863	Kpna3	1	0	0	0	0
ENSMUSG00000000384	MGI:1100868	Tbrg4	1	1	0	0	1
ENSMUSG00000021360	MGI:1100870	Gcnt2	1	0	0	0	1
ENSMUSG00000019817	MGI:1100874	Plagl1	1	0	0	0	1
ENSMUSG00000011114	MGI:1100877	Tbrg1	1	1	0	0	0
ENSMUSG00000041571	MGI:1100878	Sepw1	1	0	0	0	0
ENSMUSG00000027978	MGI:1100881	Prss12	1	0	0	0	0
ENSMUSG00000030878	MGI:1100885	Cdr2	1	1	0	0	0
ENSMUSG00000037465	MGI:1101353	Klf10	1	0	0	0	0
ENSMUSG00000024940	MGI:1101355	Ltbp3	1	1	0	0	1
ENSMUSG00000022842	MGI:1101356	Ece2	1	0	0	0	0
ENSMUSG00000057530	MGI:1101357	Ece1	1	1	0	0	0
ENSMUSG00000001441	MGI:1101358	Npepps	1	1	1	0	1
ENSMUSG00000016559	MGI:1101768	H3f3b	1	0	0	0	0
ENSMUSG00000024325	MGI:1101770	Ring1	0	1	1	0	1
ENSMUSG00000024456	MGI:1194490	Diap1	1	0	1	0	1
ENSMUSG00000002833	MGI:1194492	Hdgfrp2	1	0	0	0	0
ENSMUSG00000004897	MGI:1194494	Hdgf	1	0	1	0	1
ENSMUSG00000047407	MGI:1194497	Tgif1	1	1	1	1	1
ENSMUSG00000050107	MGI:1194498	Gsg2	1	0	1	1	0
ENSMUSG00000025085	MGI:1194500	Ablim1	0	0	1	0	0
ENSMUSG00000018446	MGI:1194505	C1qbp	1	1	1	1	1
ENSMUSG00000028757	MGI:1194508	Ddost	1	1	0	0	0
ENSMUSG00000022193	MGI:1194513	Psmb5	1	1	1	1	1
ENSMUSG00000021262	MGI:1194884	Evl	1	0	0	0	1
ENSMUSG00000034220	MGI:1194891	Gpc1	1	1	0	0	0
ENSMUSG00000006127	MGI:1194899	Inpp5k	1	0	0	0	0
ENSMUSG00000023947	MGI:1194908	Nfkbie	1	0	0	0	0
ENSMUSG00000024033	MGI:1194909	Rsph1	1	0	0	0	0
ENSMUSG00000057236	MGI:1194912	Rbbp4	1	0	0	1	1
ENSMUSG00000023017	MGI:1194915	Accn2	1	0	0	0	0
ENSMUSG00000038379	MGI:1194921	Ttk	1	0	0	0	0
ENSMUSG00000056220	MGI:1195256	Pla2g4a	1	1	1	1	1
ENSMUSG00000035064	MGI:1195261	Eef2k	1	0	0	0	0
ENSMUSG00000029119	MGI:1195262	Man2b2	1	0	1	0	0
ENSMUSG00000019920	MGI:1195263	Lims1	1	0	0	0	0
ENSMUSG00000055866	MGI:1195265	Per2	1	0	0	0	0
ENSMUSG00000053475	MGI:1195266	Tnfaip6	0	0	0	1	1
ENSMUSG00000030890	MGI:1195267	Ilk	1	1	0	0	1
ENSMUSG00000027663	MGI:1195270	Zmat3	1	1	1	1	1
ENSMUSG00000049672	MGI:1195345	Zfp161	1	0	0	0	0
ENSMUSG00000038650	MGI:1195456	Rnh1	1	0	0	0	0
ENSMUSG00000058355	MGI:1195458	Abce1	1	1	0	0	0
ENSMUSG00000072214	MGI:1195461	41522	1	0	0	0	0
ENSMUSG00000026471	MGI:1195463	Mr1	1	0	0	0	0
ENSMUSG00000022240	MGI:1195966	Ctnnd2	1	0	0	1	0
ENSMUSG00000031921	MGI:1195972	Terf2	1	0	0	0	0
ENSMUSG00000039989	MGI:1195985	Cbx4	1	0	0	0	0
ENSMUSG00000046603	MGI:1196217	D9Ertd402e	1	0	0	0	0
ENSMUSG00000050271	MGI:1196223	D8Ertd82e	1	1	0	1	1
ENSMUSG00000029635	MGI:1196224	Cdk8	1	0	0	0	0
ENSMUSG00000028974	MGI:1196227	Dffa	1	1	1	1	0
ENSMUSG00000058446	MGI:1196246	Znrf2	1	0	0	0	0
ENSMUSG00000036940	MGI:1196256	Kdm1a	1	1	0	0	1
ENSMUSG00000024165	MGI:1196260	Hn1l	1	1	1	1	1
ENSMUSG00000044763	MGI:1196261	Rg9mtd1	1	0	0	1	0
ENSMUSG00000028873	MGI:1196274	Cdca8	1	0	1	1	1
ENSMUSG00000044700	MGI:1196277	Tmem201	1	1	1	1	0
ENSMUSG00000027613	MGI:1196288	Eif6	1	1	1	1	0
ENSMUSG00000027263	MGI:1196293	Tubgcp4	1	0	0	0	0
ENSMUSG00000028034	MGI:1196294	Fubp1	1	0	0	1	0
ENSMUSG00000037260	MGI:1196297	Hgsnat	1	1	1	1	1
ENSMUSG00000026634	MGI:1196310	Angel2	1	1	0	0	0
ENSMUSG00000025184	MGI:1196316	D19Ertd386e	1	0	1	1	1
ENSMUSG00000037824	MGI:1196325	Tspan14	0	0	1	0	0
ENSMUSG00000010047	MGI:1196334	Hyal2	1	1	1	1	1
ENSMUSG00000012076	MGI:1196337	Brms1l	1	0	1	0	0
ENSMUSG00000031467	MGI:1196345	Agpat5	0	0	0	1	1
ENSMUSG00000034312	MGI:1196356	Iqsec1	1	1	0	1	1
ENSMUSG00000023068	MGI:1196365	Nus1	1	0	0	0	0
ENSMUSG00000008393	MGI:1196368	Carhsp1	1	1	0	0	0
ENSMUSG00000019854	MGI:1196373	Reps1	1	0	0	0	0
ENSMUSG00000019850	MGI:1196377	Tnfaip3	1	0	0	0	1
ENSMUSG00000052369	MGI:1196384	Tmem106c	1	1	1	1	0
ENSMUSG00000018677	MGI:1196386	Slc25a39	1	1	0	0	0
ENSMUSG00000039176	MGI:1196389	Polg	1	1	0	1	0
ENSMUSG00000007080	MGI:1196391	Pole	1	0	1	1	0
ENSMUSG00000032123	MGI:1196396	Dpagt1	1	0	0	1	0
ENSMUSG00000047710	MGI:1196398	Zfp828	1	0	0	0	0
ENSMUSG00000022864	MGI:1196400	D16Ertd472e	1	0	1	1	1
ENSMUSG00000033411	MGI:1196405	Ctdspl2	1	0	0	1	0
ENSMUSG00000012535	MGI:1196412	Tnpo3	1	0	0	0	0
ENSMUSG00000026563	MGI:1196415	Tada1	1	0	0	0	0
ENSMUSG00000027244	MGI:1196429	Atg13	1	0	0	0	1
ENSMUSG00000002428	MGI:1196437	Hltf	1	0	0	0	0
ENSMUSG00000028986	MGI:1196453	Klhl7	1	1	1	1	0
ENSMUSG00000002608	MGI:1196455	Ccdc97	1	0	0	0	0
ENSMUSG00000054428	MGI:1196457	Atpif1	1	1	0	0	0
ENSMUSG00000029426	MGI:1196458	Scarb2	1	1	0	1	0
ENSMUSG00000033487	MGI:1196463	Fndc3a	1	0	0	1	0
ENSMUSG00000029141	MGI:1196608	Slc4a1ap	1	0	0	1	0
ENSMUSG00000037966	MGI:1196617	Ninj1	1	0	0	0	0
ENSMUSG00000033813	MGI:1196624	Tcea1	1	1	0	0	0
ENSMUSG00000044674	MGI:1196625	Fzd1	1	0	0	1	1
ENSMUSG00000032000	MGI:1197007	Birc3	1	0	0	0	0
ENSMUSG00000005124	MGI:1197008	Wisp1	1	0	0	0	1
ENSMUSG00000057367	MGI:1197009	Birc2	1	0	0	0	0
ENSMUSG00000020473	MGI:1197012	Aebp1	1	0	1	0	0
ENSMUSG00000031453	MGI:1197013	Rasa3	1	0	0	0	0
ENSMUSG00000002307	MGI:1197015	Daxx	1	1	0	0	1
ENSMUSG00000020974	MGI:1197514	Pole2	1	0	0	0	0
ENSMUSG00000020451	MGI:1197517	Limk2	1	0	0	0	1
ENSMUSG00000027381	MGI:1197519	Bcl2l11	0	0	1	0	0
ENSMUSG00000031734	MGI:1197522	Irx3	1	0	1	1	1
ENSMUSG00000024851	MGI:1197524	Pitpnm1	1	0	0	0	0
ENSMUSG00000001504	MGI:1197526	Irx2	1	1	0	0	1
ENSMUSG00000002814	MGI:1197527	Top3a	1	0	1	1	0
ENSMUSG00000021950	MGI:1201374	Anxa8	1	0	0	1	0
ENSMUSG00000029484	MGI:1201378	Anxa3	1	1	1	1	1
ENSMUSG00000053510	MGI:1201386	Nrd1	1	0	0	0	0
ENSMUSG00000017376	MGI:1201387	Nlk	1	0	0	0	0
ENSMUSG00000030733	MGI:1201407	Sh2b1	1	1	1	1	0
ENSMUSG00000062604	MGI:1201408	Srpk2	1	1	1	1	0
ENSMUSG00000006705	MGI:1201409	Pknox1	1	0	0	0	0
ENSMUSG00000026577	MGI:1201607	Blzf1	1	0	0	0	1
ENSMUSG00000089911	MGI:1201609	Hiat1	1	1	0	1	0
ENSMUSG00000023805	MGI:1201671	Synj2	1	0	1	1	0
ENSMUSG00000032402	MGI:1201674	Smad3	1	1	1	1	1
ENSMUSG00000028458	MGI:1201675	Tesk1	1	1	0	0	0
ENSMUSG00000020866	MGI:1201678	Cacna1g	1	1	0	0	0
ENSMUSG00000035901	MGI:1201681	Dennd5a	1	1	0	0	1
ENSMUSG00000003779	MGI:1201682	Kif20a	1	1	0	0	0
ENSMUSG00000030970	MGI:1201686	Ctbp2	0	1	0	0	0
ENSMUSG00000024308	MGI:1201689	Tapbp	1	1	1	0	0
ENSMUSG00000055407	MGI:1201690	Mtap6	1	1	1	1	1
ENSMUSG00000029110	MGI:1201691	Rnf4	1	0	0	0	0
ENSMUSG00000013160	MGI:1201778	Atp6v0d1	1	0	0	0	0
ENSMUSG00000052459	MGI:1201780	Atp6v1a	1	1	0	1	0
ENSMUSG00000009687	MGI:1201785	Fxyd5	1	0	1	0	0
ENSMUSG00000020027	MGI:1201787	Socs2	1	0	0	0	0
ENSMUSG00000053113	MGI:1201791	Socs3	1	1	0	0	1
ENSMUSG00000028081	MGI:1202063	Rps3a	1	1	0	1	0
ENSMUSG00000078974	MGI:1202066	Sec61g	1	0	0	0	0
ENSMUSG00000029394	MGI:1202069	Cdk2ap1	1	0	0	0	0
ENSMUSG00000033068	MGI:1202295	Entpd6	1	0	0	0	0
ENSMUSG00000026643	MGI:1202298	Nmt2	1	1	1	1	0
ENSMUSG00000027598	MGI:1202301	Itch	1	1	1	1	1
ENSMUSG00000008958	MGI:1202305	Vps72	1	1	0	0	1
ENSMUSG00000024740	MGI:1202384	Ddb1	1	0	0	0	0
ENSMUSG00000033066	MGI:1202388	Gas7	1	1	1	1	1
ENSMUSG00000003435	MGI:1202400	Supt5h	1	0	0	0	0
ENSMUSG00000069094	MGI:1202402	Pde7a	1	0	0	0	0
ENSMUSG00000019969	MGI:1202717	Psen1	1	1	0	0	0
ENSMUSG00000060261	MGI:1202722	Gtf2i	1	1	0	0	0
ENSMUSG00000021660	MGI:1202875	Btf3	1	0	0	0	0
ENSMUSG00000055799	MGI:1202876	Tcf7l1	1	0	0	0	0
ENSMUSG00000003531	MGI:1202877	Dgcr6	1	0	0	0	0
ENSMUSG00000024985	MGI:1202879	Tcf7l2	1	0	0	0	0
ENSMUSG00000017386	MGI:1202880	Traf4	1	0	0	0	0
ENSMUSG00000021268	MGI:1202886	Meg3	1	0	0	0	0
ENSMUSG00000020186	MGI:1202907	Csrp2	0	1	0	0	0
ENSMUSG00000030016	MGI:1203484	Zfml	1	0	1	0	0
ENSMUSG00000061032	MGI:1203500	Rrp1	1	0	1	0	0
ENSMUSG00000017716	MGI:1203517	Birc5	1	0	0	0	0
ENSMUSG00000034974	MGI:1203520	Dapk3	1	0	0	0	0
ENSMUSG00000045095	MGI:1203522	Magi1	1	0	1	1	0
ENSMUSG00000032481	MGI:1203524	Smarcc1	1	1	1	1	1
ENSMUSG00000071454	MGI:1203728	Dtnb	1	0	1	0	0
ENSMUSG00000030660	MGI:1203729	Pik3c2a	1	0	0	1	0
ENSMUSG00000022898	MGI:1206040	Dscr3	1	0	1	1	1
ENSMUSG00000027665	MGI:1206581	Pik3ca	1	0	0	0	1
ENSMUSG00000021901	MGI:1206586	Bap1	1	1	0	0	0
ENSMUSG00000020097	MGI:1261415	Sgpl1	1	1	0	0	0
ENSMUSG00000020021	MGI:1261419	Fgd6	1	1	1	1	1
ENSMUSG00000022453	MGI:1261422	Naga	1	0	0	0	0
ENSMUSG00000026029	MGI:1261423	Casp8	1	1	0	0	1
ENSMUSG00000022191	MGI:1261425	Drosha	1	1	1	1	0
ENSMUSG00000015337	MGI:1261433	Endog	1	1	0	0	0
ENSMUSG00000030162	MGI:1261434	Olr1	0	1	1	0	0
ENSMUSG00000025781	MGI:1261437	Atp5c1	1	0	0	0	0
ENSMUSG00000017548	MGI:1261758	Suz12	1	0	0	0	0
ENSMUSG00000047963	MGI:1261768	Stbd1	1	0	0	0	0
ENSMUSG00000048911	MGI:1261771	Rnf24	1	0	0	0	0
ENSMUSG00000037526	MGI:1261775	Atg14	1	0	1	1	1
ENSMUSG00000022157	MGI:1261780	Mcpt8	0	0	0	0	1
ENSMUSG00000020589	MGI:1261783	Fam49a	0	0	1	0	0
ENSMUSG00000022177	MGI:1261794	Haus4	1	1	1	1	0
ENSMUSG00000020392	MGI:1261797	Cdkn2aipnl	1	0	0	0	0
ENSMUSG00000018841	MGI:1261809	Rad51l3	1	0	0	1	0
ENSMUSG00000070576	MGI:1261813	Mn1	1	1	0	0	0
ENSMUSG00000035863	MGI:1261814	Palm	1	0	0	0	0
ENSMUSG00000020661	MGI:1261827	Dnmt3a	1	0	0	0	0
ENSMUSG00000031600	MGI:1261835	Vps37a	1	1	1	1	0
ENSMUSG00000022751	MGI:1261838	Nit2	1	0	0	0	0
ENSMUSG00000021171	MGI:1261845	Esyt2	1	1	1	1	0
ENSMUSG00000021115	MGI:1261847	Vrk1	1	0	1	0	0
ENSMUSG00000029190	MGI:1261849	D5Ertd579e	1	1	1	0	1
ENSMUSG00000029501	MGI:1261856	Ankle2	1	1	1	1	1
ENSMUSG00000041895	MGI:1261864	Wipi1	1	0	0	0	0
ENSMUSG00000031563	MGI:1261872	Wwc2	1	1	0	1	0
ENSMUSG00000047539	MGI:1261890	Fbxo28	1	0	1	0	1
ENSMUSG00000022064	MGI:1261910	Pibf1	1	1	0	0	0
ENSMUSG00000029512	MGI:1270126	Ulk1	1	1	1	1	0
ENSMUSG00000029640	MGI:1270128	Usp12	1	0	0	0	0
ENSMUSG00000028410	MGI:1270129	Dnaja1	1	0	0	0	0
ENSMUSG00000052914	MGI:1270148	Cyp2j6	1	0	0	0	0
ENSMUSG00000005873	MGI:1270152	Reep5	1	0	0	0	0
ENSMUSG00000027288	MGI:1270153	Zfp106	1	1	1	1	0
ENSMUSG00000014226	MGI:1270839	Cacybp	0	1	1	1	0
ENSMUSG00000020038	MGI:1270841	Cry1	1	1	0	0	0
ENSMUSG00000020516	MGI:1270849	Rps6kb1	1	0	1	1	0
ENSMUSG00000068742	MGI:1270859	Cry2	1	0	0	0	0
ENSMUSG00000032372	MGI:1270860	Plscr2	1	0	1	0	0
ENSMUSG00000019849	MGI:1270863	Prep	1	1	0	0	0
ENSMUSG00000022883	MGI:1274781	Robo1	1	0	0	0	0
ENSMUSG00000026723	MGI:1274787	Trdmt1	1	0	0	0	0
ENSMUSG00000025503	MGI:1274789	Taldo1	1	0	0	0	0
ENSMUSG00000040383	MGI:1276102	Aqr	1	1	1	0	1
ENSMUSG00000021258	MGI:1276106	Ccnk	1	1	1	0	1
ENSMUSG00000028226	MGI:1276107	Mmp16	1	0	0	0	0
ENSMUSG00000024073	MGI:1276108	Birc6	1	0	1	1	1
ENSMUSG00000006412	MGI:1276111	Pfdn2	1	1	1	1	1
ENSMUSG00000055024	MGI:1276116	Ep300	1	0	1	0	0
ENSMUSG00000030802	MGI:1276121	Bckdk	1	0	0	0	0
ENSMUSG00000029505	MGI:1276124	Ep400	1	1	1	1	1
ENSMUSG00000005886	MGI:1276533	Ncoa2	1	0	1	1	0
ENSMUSG00000030826	MGI:1276534	Bcat2	1	0	0	1	0
ENSMUSG00000027678	MGI:1276535	Ncoa3	1	1	1	1	1
ENSMUSG00000040785	MGI:1276539	Ttc3	1	1	1	1	0
ENSMUSG00000021488	MGI:1276545	Nsd1	1	0	0	0	0
ENSMUSG00000037972	MGI:1276549	Snn	1	0	0	0	0
ENSMUSG00000057406	MGI:1276574	Whsc1	1	0	0	0	0
ENSMUSG00000021518	MGI:1276575	Ptdss1	1	1	1	1	0
ENSMUSG00000026064	MGI:1277096	Ptp4a1	0	0	0	0	1
ENSMUSG00000059895	MGI:1277098	Ptp4a3	1	0	0	1	0
ENSMUSG00000020328	MGI:1277103	Nudcd2	1	0	0	0	0
ENSMUSG00000024855	MGI:1277113	Pacs1	1	1	0	0	0
ENSMUSG00000027864	MGI:1277114	Ptgfrn	1	1	0	0	1
ENSMUSG00000025584	MGI:1277116	Pde8a	1	0	0	0	0
ENSMUSG00000028788	MGI:1277117	Ptp4a2	1	1	1	1	1
ENSMUSG00000057895	MGI:1277119	Zfp105	1	0	0	0	0
ENSMUSG00000074513	MGI:1277120	Arfip1	1	0	1	1	1
ENSMUSG00000019539	MGI:1277122	Rcn3	1	0	0	0	0
ENSMUSG00000031591	MGI:1277124	Asah1	1	1	1	1	1
ENSMUSG00000029387	MGI:1277143	Gtf2h3	1	1	0	1	1
ENSMUSG00000024544	MGI:1277150	D18Ertd653e	1	1	0	1	0
ENSMUSG00000040274	MGI:1277162	Cdk6	1	0	0	0	0
ENSMUSG00000027109	MGI:1277166	Sp3	1	1	0	0	0
ENSMUSG00000019883	MGI:1277169	Echdc1	1	1	0	0	0
ENSMUSG00000004393	MGI:1277172	Ddx56	1	1	0	0	0
ENSMUSG00000019467	MGI:1277173	Arhgef25	1	0	0	0	0
ENSMUSG00000037119	MGI:1277178	D15Ertd621e	1	0	0	0	0
ENSMUSG00000064215	MGI:1277180	Ifi27l1	1	0	0	0	0
ENSMUSG00000044768	MGI:1277184	D1Ertd622e	1	0	0	0	0
ENSMUSG00000015759	MGI:1277202	Cnih	0	1	1	1	1
ENSMUSG00000049606	MGI:1277212	Zfp644	1	1	1	1	1
ENSMUSG00000058013	MGI:1277214	41528	1	0	0	1	0
ENSMUSG00000006599	MGI:1277216	Gtf2h1	1	1	0	0	0
ENSMUSG00000022466	MGI:1277218	Rpap3	1	1	0	1	0
ENSMUSG00000024732	MGI:1277220	Ccdc86	1	0	0	0	0
ENSMUSG00000042605	MGI:1277223	Atxn2	1	0	0	0	0
ENSMUSG00000027868	MGI:1277234	Tbx15	1	1	1	0	0
ENSMUSG00000028914	MGI:1277950	Casp9	1	0	1	0	0
ENSMUSG00000026520	MGI:1277956	Pycr2	1	0	0	0	0
ENSMUSG00000054342	MGI:1277957	Kcnn4	1	0	1	1	1
ENSMUSG00000031592	MGI:1277958	Pcm1	1	1	1	1	1
ENSMUSG00000020886	MGI:1277959	Dlg4	1	1	0	0	0
ENSMUSG00000061859	MGI:1277960	Inadl	1	0	0	0	0
ENSMUSG00000022565	MGI:1277961	Plec	1	1	0	0	1
ENSMUSG00000020413	MGI:1277962	Hus1	1	0	0	1	0
ENSMUSG00000004044	MGI:1277968	Ptrf	1	0	0	0	0
ENSMUSG00000061079	MGI:1277969	Zfp143	1	0	0	0	0
ENSMUSG00000040714	MGI:1277971	Klc3	1	1	0	1	1
ENSMUSG00000030264	MGI:1277973	Thumpd3	1	0	0	0	0
ENSMUSG00000027272	MGI:1277977	Ubr1	1	1	1	1	0
ENSMUSG00000021963	MGI:1277978	Sap18	1	0	0	0	0
ENSMUSG00000025403	MGI:1277989	Shmt2	1	1	1	0	1
ENSMUSG00000020953	MGI:1278313	Coch	1	0	0	1	0
ENSMUSG00000024913	MGI:1278315	Lrp5	1	1	0	0	0
ENSMUSG00000069495	MGI:1278321	Epc2	1	1	0	0	0
ENSMUSG00000024240	MGI:1278322	Epc1	1	1	0	0	0
ENSMUSG00000026209	MGI:1278328	Dnpep	1	0	0	0	0
ENSMUSG00000019822	MGI:1278330	Smpd2	1	0	0	0	0
ENSMUSG00000024750	MGI:1278334	Zfand5	1	0	1	0	0
ENSMUSG00000041453	MGI:1278340	Rpl21	1	0	1	0	1
ENSMUSG00000029432	MGI:1278343	Gbas	1	0	0	1	1
ENSMUSG00000020185	MGI:1289147	E2f7	1	0	0	0	0
ENSMUSG00000001909	MGI:1289155	Trmt1	1	1	0	1	0
ENSMUSG00000022033	MGI:1289156	Pbk	1	0	0	0	0
ENSMUSG00000020691	MGI:1289171	Mettl2	1	0	0	0	0
ENSMUSG00000069539	MGI:1289172	Scyl2	1	0	1	0	1
ENSMUSG00000057858	MGI:1289174	D19Ertd737e	1	1	1	1	0
ENSMUSG00000056770	MGI:1289184	Setd3	1	1	1	0	1
ENSMUSG00000070327	MGI:1289196	Rnf213	1	1	0	0	0
ENSMUSG00000047554	MGI:1289225	Tmem41b	1	1	0	0	1
ENSMUSG00000019923	MGI:1289227	Zwint	1	0	0	0	0
ENSMUSG00000033885	MGI:1289230	Pxk	1	0	0	1	1
ENSMUSG00000019362	MGI:1289231	D8Ertd738e	0	1	0	1	1
ENSMUSG00000028601	MGI:1289238	Echdc2	1	1	1	1	1
ENSMUSG00000022999	MGI:1289247	Lmbr1l	1	0	0	0	0
ENSMUSG00000041769	MGI:1289252	Ppp2r2d	1	0	1	0	0
ENSMUSG00000050627	MGI:1289257	Gpd1l	1	0	1	1	0
ENSMUSG00000051864	MGI:1289265	Tbc1d22a	1	1	0	0	1
ENSMUSG00000039220	MGI:1289273	Ppp1r10	0	0	1	1	1
ENSMUSG00000063334	MGI:1289274	Krr1	1	1	0	0	0
ENSMUSG00000042472	MGI:1289280	Zfp410	0	1	0	0	0
ENSMUSG00000052253	MGI:1289282	Zfp622	1	0	0	0	0
ENSMUSG00000022560	MGI:1289288	Gpr172b	1	1	1	0	1
ENSMUSG00000018347	MGI:1289293	Zkscan6	1	0	0	0	0
ENSMUSG00000034973	MGI:1289294	Dopey1	1	0	1	1	0
ENSMUSG00000019897	MGI:1289302	Ccdc59	1	1	0	0	0
ENSMUSG00000004535	MGI:1289308	Tax1bp1	1	0	0	0	0
ENSMUSG00000020925	MGI:1289318	Ccdc43	1	0	0	0	0
ENSMUSG00000030706	MGI:1289321	Mrpl48	1	1	1	1	1
ENSMUSG00000020107	MGI:1289325	Anapc16	1	1	0	0	0
ENSMUSG00000029464	MGI:1289326	Gpn3	1	0	0	0	1
ENSMUSG00000036613	MGI:1289332	Tssc1	1	1	1	1	1
ENSMUSG00000028657	MGI:1298204	Ppt1	1	1	0	1	1
ENSMUSG00000026737	MGI:1298206	Pip4k2a	1	0	0	0	1
ENSMUSG00000030201	MGI:1298218	Lrp6	1	1	1	0	1
ENSMUSG00000034902	MGI:1298224	Pip5k1c	1	1	0	0	0
ENSMUSG00000026355	MGI:1298227	Mcm6	0	1	0	1	0
ENSMUSG00000021806	MGI:1298229	Nid2	1	1	1	1	1
ENSMUSG00000031601	MGI:1298230	Cnot7	1	1	1	1	1
ENSMUSG00000034118	MGI:1298231	Tpst1	1	0	0	0	0
ENSMUSG00000023027	MGI:1298366	Atf1	1	0	0	0	0
ENSMUSG00000020196	MGI:1298375	Cabin1	1	1	0	1	0
ENSMUSG00000058454	MGI:1298378	Dhcr7	1	0	0	0	0
ENSMUSG00000001666	MGI:1298381	Ddt	1	0	0	0	0
ENSMUSG00000000296	MGI:1298386	Tpd52l1	1	0	0	0	0
ENSMUSG00000022814	MGI:1298388	Umps	1	0	0	0	0
ENSMUSG00000031015	MGI:1298390	Swap70	1	1	0	0	1
ENSMUSG00000071657	MGI:1298392	Bscl2	1	0	0	0	0
ENSMUSG00000053617	MGI:1298393	Sh3pxd2a	1	1	1	1	0
ENSMUSG00000047514	MGI:1298395	Tspyl1	1	0	0	0	0
ENSMUSG00000023064	MGI:1298397	Sncg	0	0	0	1	0
ENSMUSG00000029730	MGI:1298398	Mcm7	1	0	0	0	0
ENSMUSG00000022841	MGI:1298405	Ap2m1	1	0	0	0	0
ENSMUSG00000022110	MGI:1306775	Sucla2	1	1	1	1	1
ENSMUSG00000027254	MGI:1306776	Mtap1a	1	1	1	1	1
ENSMUSG00000052727	MGI:1306778	Mtap1b	1	1	1	1	1
ENSMUSG00000029201	MGI:1306785	Ugdh	1	0	0	0	0
ENSMUSG00000038729	MGI:1306795	Akap2	1	1	0	1	0
ENSMUSG00000019979	MGI:1306796	Apaf1	1	1	1	0	1
ENSMUSG00000019326	MGI:1306797	Aoc3	1	0	0	0	0
ENSMUSG00000091747	MGI:1306799	D17H6S56E-5	1	0	0	0	1
ENSMUSG00000055421	MGI:1306801	Pcdh9	0	0	0	0	1
ENSMUSG00000062352	MGI:1306802	Itgb1bp1	1	1	1	1	1
ENSMUSG00000066877	MGI:1306821	Nck2	1	1	0	0	0
ENSMUSG00000034931	MGI:1306823	Dhx8	1	1	1	1	1
ENSMUSG00000061838	MGI:1306824	Suclg2	1	1	0	0	0
ENSMUSG00000033434	MGI:1306825	Gtpbp6	1	1	1	1	1
ENSMUSG00000038264	MGI:1306826	Sema7a	1	0	0	1	0
ENSMUSG00000039148	MGI:1309453	Sart1	1	1	0	0	1
ENSMUSG00000032932	MGI:1309463	Hspa13	1	0	1	0	0
ENSMUSG00000017765	MGI:1309465	Slc12a4	1	1	0	0	0
ENSMUSG00000004032	MGI:1309466	Gstm5	1	0	1	0	0
ENSMUSG00000035021	MGI:1309478	Baz1a	1	1	0	0	1
ENSMUSG00000027304	MGI:1309480	Rtf1	1	1	1	1	1
ENSMUSG00000026219	MGI:1309481	Trip12	1	0	0	0	1
ENSMUSG00000029283	MGI:1309511	Cdc7	1	0	0	0	0
ENSMUSG00000032348	MGI:1309515	Gsta4	1	0	0	0	0
ENSMUSG00000029344	MGI:1309516	Tpst2	1	0	0	0	0
ENSMUSG00000022108	MGI:1309517	Itm2b	1	0	0	0	0
ENSMUSG00000061787	MGI:1309526	Rps17	1	0	0	0	0
ENSMUSG00000019907	MGI:1309528	Ppp1r12a	1	1	0	0	1
ENSMUSG00000022947	MGI:1309992	Cbr3	1	0	0	0	0
ENSMUSG00000027997	MGI:1312921	Casp6	1	1	0	1	1
ENSMUSG00000025887	MGI:1312922	Casp12	1	0	0	0	0
ENSMUSG00000026547	MGI:1312985	Tagln2	1	1	1	1	1
ENSMUSG00000063146	MGI:1313136	Clip2	1	1	0	0	0
ENSMUSG00000022636	MGI:1313266	Alcam	1	0	0	0	0
ENSMUSG00000006958	MGI:1313268	Chrd	1	0	0	0	0
ENSMUSG00000026201	MGI:1313271	Stk16	1	0	0	0	1
ENSMUSG00000041429	MGI:1313275	Nthl1	1	0	1	1	1
ENSMUSG00000020894	MGI:1313277	Vamp2	1	1	0	1	0
ENSMUSG00000028683	MGI:1313286	Eif2b3	1	0	0	0	0
ENSMUSG00000024660	MGI:1313288	Incenp	1	0	0	0	0
ENSMUSG00000018377	MGI:1313291	Vezf1	1	1	1	1	1
ENSMUSG00000026605	MGI:1313302	Cenpf	1	0	0	0	0
ENSMUSG00000022332	MGI:1313312	Khdrbs3	1	0	0	0	0
ENSMUSG00000068036	MGI:1314653	Mllt4	1	0	0	0	1
ENSMUSG00000061436	MGI:1314872	Hipk2	1	0	0	0	0
ENSMUSG00000008730	MGI:1314873	Hipk1	1	1	1	1	1
ENSMUSG00000022945	MGI:1314881	Chaf1b	1	0	1	1	1
ENSMUSG00000027177	MGI:1314882	Hipk3	1	1	0	1	0
ENSMUSG00000028599	MGI:1314883	Tnfrsf1b	1	1	1	1	1
ENSMUSG00000030341	MGI:1314884	Tnfrsf1a	1	0	1	0	1
ENSMUSG00000004268	MGI:1315195	Emg1	1	0	0	0	0
ENSMUSG00000089847	MGI:1315196	Fxc1	0	0	1	0	0
ENSMUSG00000000628	MGI:1315197	Hk2	1	1	1	1	1
ENSMUSG00000023505	MGI:1315198	Cdca3	1	0	0	0	0
ENSMUSG00000038451	MGI:1315199	Spsb2	1	0	0	0	0
ENSMUSG00000030041	MGI:1315200	D6Mm5e	0	0	1	0	0
ENSMUSG00000056427	MGI:1315202	Slit3	1	1	1	0	1
ENSMUSG00000031558	MGI:1315205	Slit2	1	1	1	0	1
ENSMUSG00000023191	MGI:1315208	Leprel2	1	0	0	0	0
ENSMUSG00000048490	MGI:1315213	Nrip1	1	0	0	0	0
ENSMUSG00000066026	MGI:1315215	Dhrs3	1	0	1	1	1
ENSMUSG00000069833	MGI:1316648	Ahnak	1	1	0	0	0
ENSMUSG00000061878	MGI:1316649	Sphk1	1	1	1	1	1
ENSMUSG00000032114	MGI:1316650	Slc37a4	1	0	1	1	0
ENSMUSG00000020230	MGI:1316652	Prmt2	1	0	0	0	0
ENSMUSG00000028538	MGI:1316659	St3gal3	1	0	1	1	0
ENSMUSG00000022248	MGI:1316678	Rad1	1	0	0	0	0
ENSMUSG00000059119	MGI:1316687	Nap1l4	1	0	0	0	0
ENSMUSG00000027618	MGI:1316706	Nfs1	1	1	1	1	1
ENSMUSG00000010048	MGI:1316708	Ifrd2	1	1	1	1	1
ENSMUSG00000032330	MGI:1316715	Cox7a2	1	0	0	0	0
ENSMUSG00000001627	MGI:1316717	Ifrd1	1	0	0	0	0
ENSMUSG00000019230	MGI:1316721	Lhx9	1	0	0	0	0
ENSMUSG00000062203	MGI:1316728	Gspt1	1	1	0	0	0
ENSMUSG00000020303	MGI:1316731	Stc2	1	0	1	0	1
ENSMUSG00000056025	MGI:1316732	Clca1	1	1	0	0	0
ENSMUSG00000024947	MGI:1316736	Men1	1	0	0	0	0
ENSMUSG00000032038	MGI:1316743	St3gal4	1	1	1	1	0
ENSMUSG00000020267	MGI:1321133	Hint1	0	0	1	0	0
ENSMUSG00000020349	MGI:1321159	Ppp2ca	1	0	0	0	1
ENSMUSG00000009630	MGI:1321161	Ppp2cb	1	1	0	1	1
ENSMUSG00000021236	MGI:1321385	Entpd5	1	0	0	0	0
ENSMUSG00000028955	MGI:1321389	Vamp3	1	0	0	1	0
ENSMUSG00000020003	MGI:1321392	Pex7	1	0	0	0	0
ENSMUSG00000039994	MGI:1321393	Timeless	1	0	1	0	0
ENSMUSG00000040488	MGI:1321395	Ltbp4	1	0	0	1	0
ENSMUSG00000032322	MGI:1321396	Pstpip1	0	0	1	0	1
ENSMUSG00000038235	MGI:1321398	F11r	0	1	1	1	1
ENSMUSG00000026037	MGI:1328306	Orc2	1	0	0	0	0
ENSMUSG00000040701	MGI:1328307	Ap1g2	1	0	0	0	0
ENSMUSG00000022390	MGI:1328310	Zc3h7b	1	0	1	0	0
ENSMUSG00000022617	MGI:1328313	Chkb	1	0	0	0	0
ENSMUSG00000015575	MGI:1328318	Atp6v0e	0	0	1	0	0
ENSMUSG00000048277	MGI:1328324	Syngr2	1	1	1	1	0
ENSMUSG00000027656	MGI:1328326	Wisp2	1	0	1	0	0
ENSMUSG00000028587	MGI:1328337	Orc1	1	0	0	0	0
ENSMUSG00000039474	MGI:1328355	Wfs1	1	0	0	0	1
ENSMUSG00000024824	MGI:1328356	Rad9	1	0	0	0	0
ENSMUSG00000002058	MGI:1328357	Unc119	1	0	0	0	0
ENSMUSG00000026413	MGI:1328359	Pkp1	1	0	0	1	0
ENSMUSG00000019564	MGI:1328360	Arid3a	1	0	0	0	0
ENSMUSG00000026196	MGI:1328361	Bard1	1	0	0	0	0
ENSMUSG00000030528	MGI:1328362	Blm	1	0	0	0	0
ENSMUSG00000011960	MGI:1328363	Ccnt1	1	1	0	1	0
ENSMUSG00000041559	MGI:1328364	Fmod	1	0	1	0	0
ENSMUSG00000000902	MGI:1328366	Smarcb1	1	1	0	0	0
ENSMUSG00000021540	MGI:1328787	Smad5	1	1	0	1	1
ENSMUSG00000018900	MGI:1329012	Slc22a5	0	0	1	0	0
ENSMUSG00000026718	MGI:1329014	Stam	1	0	0	0	0
ENSMUSG00000020964	MGI:1329016	Sel1l	1	0	0	1	0
ENSMUSG00000034488	MGI:1329025	Edil3	1	0	0	1	0
ENSMUSG00000028212	MGI:1329034	Ccne2	1	0	0	0	0
ENSMUSG00000073987	MGI:1329035	Ggh	1	1	1	1	1
ENSMUSG00000030224	MGI:1329037	Strap	1	1	1	1	0
ENSMUSG00000026743	MGI:1329038	Mllt10	1	0	0	0	0
ENSMUSG00000031780	MGI:1329039	Ccl17	1	0	1	1	0
ENSMUSG00000028274	MGI:1329041	Rngtt	1	0	0	0	0
ENSMUSG00000004631	MGI:1329042	Sgce	1	0	0	0	0
ENSMUSG00000001521	MGI:1329045	Tulp3	1	1	0	1	1
ENSMUSG00000024899	MGI:1330223	Papss2	1	1	0	0	0
ENSMUSG00000032078	MGI:1330262	Zfp259	1	0	0	0	0
ENSMUSG00000027206	MGI:1330276	Cops2	1	0	0	0	0
ENSMUSG00000061665	MGI:1330281	Cd2ap	1	1	1	1	0
ENSMUSG00000020358	MGI:1330294	Hnrnpab	1	1	1	0	1
ENSMUSG00000022897	MGI:1330299	Dyrk1a	1	0	0	0	0
ENSMUSG00000016526	MGI:1330300	Dyrk3	1	0	1	1	0
ENSMUSG00000028630	MGI:1330301	Dyrk2	1	0	0	0	0
ENSMUSG00000002409	MGI:1330302	Dyrk1b	1	0	0	0	0
ENSMUSG00000024319	MGI:1330304	Vps52	1	1	1	0	0
ENSMUSG00000028032	MGI:1330587	Papss1	1	1	1	0	0
ENSMUSG00000027739	MGI:1330805	Rab33b	1	0	0	0	0
ENSMUSG00000026675	MGI:1330808	Hsd17b7	1	1	1	1	1
ENSMUSG00000025324	MGI:1330809	Atp10a	1	0	0	1	1
ENSMUSG00000020777	MGI:1330812	Acox1	1	0	0	0	0
ENSMUSG00000033684	MGI:1330818	Qsox1	1	0	1	1	1
ENSMUSG00000022146	MGI:1330819	Osmr	1	1	0	0	0
ENSMUSG00000027546	MGI:1330826	Atp9a	1	1	0	1	1
ENSMUSG00000028979	MGI:1330832	Masp2	0	0	1	0	0
ENSMUSG00000021190	MGI:1330838	Lgmn	1	1	0	0	0
ENSMUSG00000027162	MGI:1330839	Lin7c	1	1	1	1	1
ENSMUSG00000022811	MGI:1332234	Zfp148	1	0	0	0	0
ENSMUSG00000058440	MGI:1332235	Nrf1	1	0	1	1	1
ENSMUSG00000058793	MGI:1332236	Cds2	1	0	1	1	1
ENSMUSG00000029681	MGI:1332238	Bcl7b	1	1	0	0	0
ENSMUSG00000028381	MGI:1332243	Ugcg	0	1	1	1	0
ENSMUSG00000022706	MGI:1332635	Mrpl40	1	1	0	0	0
ENSMUSG00000035133	MGI:1332637	Arhgap5	1	0	0	1	0
ENSMUSG00000022051	MGI:1332659	Bnip3l	1	0	0	0	0
ENSMUSG00000058388	MGI:1332671	Phtf1	0	0	0	1	0
ENSMUSG00000029454	MGI:1333110	Mapkapk5	1	0	0	0	0
ENSMUSG00000029430	MGI:1333112	Ran	1	0	1	1	1
ENSMUSG00000025728	MGI:1333114	Pigq	1	0	0	0	0
ENSMUSG00000001018	MGI:1333745	Snapin	1	1	1	0	1
ENSMUSG00000032504	MGI:1333753	Pdcd6ip	1	1	0	0	0
ENSMUSG00000026159	MGI:1333754	Agfg1	1	1	0	0	0
ENSMUSG00000024077	MGI:1333757	Strn	1	1	1	1	0
ENSMUSG00000001036	MGI:1333766	Epn2	1	0	1	1	0
ENSMUSG00000062981	MGI:1333774	Mrpl42	1	0	0	0	0
ENSMUSG00000040952	MGI:1333780	Rps19	1	0	0	0	1
ENSMUSG00000003363	MGI:1333782	Pld3	1	0	0	0	0
ENSMUSG00000034108	MGI:1333783	Ccs	1	1	0	0	0
ENSMUSG00000008855	MGI:1333784	Hdac5	1	0	0	0	0
ENSMUSG00000032737	MGI:1333787	Inppl1	1	1	0	0	0
ENSMUSG00000036323	MGI:1333795	Srp72	1	0	0	0	0
ENSMUSG00000021615	MGI:1333799	Xrcc4	0	0	0	0	1
ENSMUSG00000001445	MGI:1333801	Mrpl10	1	0	0	0	1
ENSMUSG00000022779	MGI:1333803	Top3b	1	1	0	0	0
ENSMUSG00000028676	MGI:1333805	Srsf10	1	1	1	1	0
ENSMUSG00000021635	MGI:1333807	Rad17	1	0	0	0	0
ENSMUSG00000024561	MGI:1333811	Mbd1	1	1	1	1	1
ENSMUSG00000035478	MGI:1333812	Mbd3	1	0	0	0	0
ENSMUSG00000024513	MGI:1333813	Mbd2	1	0	1	0	0
ENSMUSG00000036850	MGI:1333816	Mrpl41	1	1	0	0	0
ENSMUSG00000061477	MGI:1333818	Rps7	0	1	1	1	1
ENSMUSG00000037740	MGI:1333830	Mrps26	1	0	0	0	0
ENSMUSG00000038533	MGI:1333833	Cbfa2t2	1	0	1	0	0
ENSMUSG00000066150	MGI:1333843	Slc31a1	1	0	0	0	0
ENSMUSG00000070407	MGI:1333853	Hs3st3b1	0	0	1	0	0
ENSMUSG00000004508	MGI:1333854	Gab2	1	0	1	0	0
ENSMUSG00000018585	MGI:1333855	Atox1	1	0	1	0	0
ENSMUSG00000033863	MGI:1333856	Klf9	1	0	1	1	0
ENSMUSG00000022799	MGI:1333857	Arhgap31	0	0	0	1	0
ENSMUSG00000036120	MGI:1333865	Rfxank	1	1	1	1	0
ENSMUSG00000050370	MGI:1333869	Ch25h	1	0	0	0	0
ENSMUSG00000030850	MGI:1333870	Ate1	1	1	0	0	0
ENSMUSG00000018661	MGI:1333873	Cog1	1	1	1	1	1
ENSMUSG00000013973	MGI:1333874	Dedd	1	1	1	1	1
ENSMUSG00000021686	MGI:1333879	Ap3b1	1	1	0	0	0
ENSMUSG00000042770	MGI:1333880	Hebp1	1	1	1	1	1
ENSMUSG00000028041	MGI:1333882	Adam15	1	0	0	0	1
ENSMUSG00000040021	MGI:1333883	Lats1	1	0	1	0	0
ENSMUSG00000040084	MGI:1333889	Bub1b	1	1	1	1	0
ENSMUSG00000020155	MGI:1334203	Kcnmb1	1	0	0	0	1
ENSMUSG00000003269	MGI:1334255	Cyth2	1	1	1	1	0
ENSMUSG00000017132	MGI:1334257	Cyth1	1	0	0	0	0
ENSMUSG00000006435	MGI:1334263	Neurl1a	0	0	1	0	0
ENSMUSG00000024580	MGI:1334416	Grpel2	1	0	0	0	0
ENSMUSG00000029198	MGI:1334417	Grpel1	0	1	0	0	1
ENSMUSG00000038861	MGI:1334433	Pi4kb	1	0	0	0	0
ENSMUSG00000022306	MGI:1334444	Zfpm2	1	0	0	1	0
ENSMUSG00000031586	MGI:1334446	Rbpms	1	1	0	1	1
ENSMUSG00000033952	MGI:1334448	Aspm	1	0	0	0	0
ENSMUSG00000003464	MGI:1334458	Pex19	1	0	1	1	1
ENSMUSG00000026670	MGI:1334459	Uap1	1	1	1	1	1
ENSMUSG00000022557	MGI:1334460	Bop1	1	1	1	0	1
ENSMUSG00000026553	MGI:1334462	Copa	1	1	1	1	1
ENSMUSG00000020630	MGI:1335073	Rnaseh1	1	1	1	1	0
ENSMUSG00000028344	MGI:1335082	Invs	1	0	0	0	0
ENSMUSG00000032244	MGI:1335087	Fem1b	1	0	1	0	1
ENSMUSG00000043683	MGI:1335089	Fem1a	1	0	0	0	0
ENSMUSG00000035011	MGI:1335091	Zbtb7a	1	0	0	0	0
ENSMUSG00000001833	MGI:1335094	41524	1	0	0	0	0
ENSMUSG00000049717	MGI:1335098	Lig4	1	0	0	0	0
ENSMUSG00000025949	MGI:1335106	Pikfyve	1	0	1	0	0
ENSMUSG00000018001	MGI:1335107	Cyth3	1	1	1	1	0
ENSMUSG00000028944	MGI:1336153	Prkag2	1	1	1	1	0
ENSMUSG00000033105	MGI:1336155	Lss	1	1	0	0	0
ENSMUSG00000024896	MGI:1336159	Minpp1	1	0	0	0	0
ENSMUSG00000026031	MGI:1336166	Cflar	1	0	0	0	0
ENSMUSG00000029513	MGI:1336167	Prkab1	1	0	0	0	1
ENSMUSG00000038607	MGI:1336169	Gng10	1	1	1	1	1
ENSMUSG00000036402	MGI:1336171	Gng12	1	1	1	0	1
ENSMUSG00000038205	MGI:1336185	Prkab2	1	1	0	0	1
ENSMUSG00000001211	MGI:1336186	Agpat3	1	1	0	0	0
ENSMUSG00000029406	MGI:1336192	Pitpnm2	1	1	0	0	0
ENSMUSG00000030894	MGI:1336194	Tpp1	1	1	0	0	1
ENSMUSG00000021285	MGI:1336199	Ppp1r13b	1	1	1	0	0
ENSMUSG00000000374	MGI:1336209	Trappc10	1	1	1	0	0
ENSMUSG00000007670	MGI:1336214	Khsrp	1	0	0	0	0
ENSMUSG00000002732	MGI:1336879	Fkbp7	1	0	1	0	0
ENSMUSG00000020929	MGI:1336880	Eftud2	1	1	1	0	1
ENSMUSG00000050732	MGI:1336882	Vamp8	1	0	0	0	1
ENSMUSG00000027460	MGI:1336887	Angpt4	0	0	0	0	1
ENSMUSG00000015536	MGI:1336894	Mocs2	1	0	1	0	0
ENSMUSG00000001998	MGI:1336993	Ap4e1	1	0	0	0	0
ENSMUSG00000026000	MGI:1336997	Lancl1	1	1	1	1	1
ENSMUSG00000000693	MGI:1337004	Loxl3	1	1	1	1	1
ENSMUSG00000020790	MGI:1337008	Ankfy1	0	1	1	1	0
ENSMUSG00000028249	MGI:1337026	Sdcbp	0	1	0	0	0
ENSMUSG00000024457	MGI:1337056	Trim26	0	1	1	0	0
ENSMUSG00000063801	MGI:1337060	Ap3s2	1	0	1	1	0
ENSMUSG00000024480	MGI:1337062	Ap3s1	1	0	0	0	0
ENSMUSG00000020955	MGI:1337065	Ap4s1	1	0	0	0	0
ENSMUSG00000056708	MGI:1337072	Ier5	0	1	0	0	0
ENSMUSG00000029478	MGI:1337080	Ncor2	1	1	0	1	0
ENSMUSG00000051234	MGI:1337096	Rnf7	1	0	1	0	0
ENSMUSG00000005103	MGI:1337100	Wdr1	1	1	1	0	0
ENSMUSG00000000958	MGI:1337120	Slc7a7	1	0	0	0	1
ENSMUSG00000030282	MGI:1337124	Cmas	1	1	0	0	0
ENSMUSG00000052906	MGI:1337129	Ubxn8	1	1	0	1	0
ENSMUSG00000032952	MGI:1337130	Ap4b1	1	0	1	1	0
ENSMUSG00000019841	MGI:1337131	Rev3l	1	0	0	0	0
ENSMUSG00000028191	MGI:1337994	Bcl10	1	1	0	0	0
ENSMUSG00000022750	MGI:1337995	Klhl22	1	0	0	0	0
ENSMUSG00000027865	MGI:1338001	Gdap2	1	1	1	0	1
ENSMUSG00000043099	MGI:1338010	Hic1	1	1	1	1	1
ENSMUSG00000021460	MGI:1338011	Auh	1	0	0	1	1
ENSMUSG00000060166	MGI:1338012	Zdhhc8	1	0	0	0	0
ENSMUSG00000068747	MGI:1338015	Sort1	0	0	1	0	0
ENSMUSG00000026525	MGI:1338022	Opn3	0	0	1	0	0
ENSMUSG00000005611	MGI:1338023	Mrvi1	1	0	1	0	1
ENSMUSG00000042870	MGI:1338026	Tom1	1	0	0	0	0
ENSMUSG00000025352	MGI:1338027	Gdf11	1	1	0	0	0
ENSMUSG00000021893	MGI:1338030	Capn7	1	1	0	1	0
ENSMUSG00000074227	MGI:1338031	Spint2	1	0	0	0	0
ENSMUSG00000038025	MGI:1338034	Phf2	1	1	0	0	0
ENSMUSG00000032582	MGI:1338037	Rbm6	1	0	0	0	0
ENSMUSG00000030232	MGI:1338038	Aebp2	1	1	0	0	0
ENSMUSG00000029918	MGI:1338046	Mrps33	1	0	0	0	0
ENSMUSG00000020640	MGI:1338049	Itsn2	1	1	0	0	0
ENSMUSG00000000884	MGI:1338057	Gnb1l	1	0	0	0	0
ENSMUSG00000024122	MGI:1338068	Pdpk1	1	1	1	1	1
ENSMUSG00000022957	MGI:1338069	Itsn1	1	0	0	1	0
ENSMUSG00000031537	MGI:1338071	Ikbkb	1	0	0	0	0
ENSMUSG00000015501	MGI:1338076	Hivep2	1	0	1	1	0
ENSMUSG00000051149	MGI:1338758	Adnp	1	1	0	1	0
ENSMUSG00000027879	MGI:1338759	Sec22b	1	1	1	0	1
ENSMUSG00000008136	MGI:1338762	Fhl2	1	0	0	0	0
ENSMUSG00000032067	MGI:1338783	Pts	1	0	0	1	0
ENSMUSG00000027907	MGI:1338798	S100a11	1	1	0	1	1
ENSMUSG00000001524	MGI:1338799	Gtf2h4	0	1	1	1	1
ENSMUSG00000026617	MGI:1338800	Bpnt1	1	1	0	1	1
ENSMUSG00000030447	MGI:1338801	Cyfip1	1	1	1	1	1
ENSMUSG00000022322	MGI:1338802	Shcbp1	1	0	0	1	0
ENSMUSG00000002107	MGI:1338822	Celf2	1	0	0	0	0
ENSMUSG00000027222	MGI:1338829	Pex16	1	0	0	0	0
ENSMUSG00000005667	MGI:1338850	Mthfd2	1	0	1	0	0
ENSMUSG00000029470	MGI:1338859	P2rx4	1	0	0	0	0
ENSMUSG00000039536	MGI:1338864	Stau1	1	1	0	1	0
ENSMUSG00000025217	MGI:1338871	Btrc	1	1	1	1	1
ENSMUSG00000020363	MGI:1338883	Gfpt2	1	0	0	0	0
ENSMUSG00000026068	MGI:1338888	Il18rap	1	0	1	0	0
ENSMUSG00000001228	MGI:1338889	Uhrf1	1	0	0	0	0
ENSMUSG00000044080	MGI:1338917	S100a1	1	0	1	0	1
ENSMUSG00000021796	MGI:1338938	Bmpr1a	1	1	0	1	0
ENSMUSG00000000530	MGI:1338946	Acvrl1	1	0	1	1	0
ENSMUSG00000067586	MGI:1339365	S1pr3	1	0	0	0	0
ENSMUSG00000001025	MGI:1339467	S100a6	1	1	1	0	0
ENSMUSG00000041959	MGI:1339468	S100a10	1	1	0	1	1
ENSMUSG00000014599	MGI:1339753	Csf1	0	1	1	0	0
ENSMUSG00000059326	MGI:1339754	Csf2ra	1	1	0	1	1
ENSMUSG00000024974	MGI:1339795	Smc3	1	0	0	0	0
ENSMUSG00000028884	MGI:1339939	Rpa2	1	0	0	0	0
ENSMUSG00000006403	MGI:1339949	Adamts4	0	0	1	1	0
ENSMUSG00000002718	MGI:1339951	Cse1l	1	1	0	1	0
ENSMUSG00000059288	MGI:1339956	Cdyl	1	1	0	0	0
ENSMUSG00000056091	MGI:1339963	St3gal5	1	1	0	0	0
ENSMUSG00000028179	MGI:1339968	Cth	1	1	0	0	0
ENSMUSG00000024758	MGI:1339970	Rtn3	1	0	0	0	0
ENSMUSG00000032178	MGI:1339973	Ilf3	1	1	0	0	1
ENSMUSG00000030774	MGI:1339975	Pak1	1	1	1	1	1
ENSMUSG00000029007	MGI:1339977	Agtrap	1	1	1	1	1
ENSMUSG00000022781	MGI:1339984	Pak2	1	0	0	0	0
ENSMUSG00000006732	MGI:1339986	Mettl1	1	0	0	0	0
ENSMUSG00000020467	MGI:1339998	Efemp1	1	0	1	0	0
ENSMUSG00000050578	MGI:1340026	Mmp13	1	0	0	0	0
ENSMUSG00000007888	MGI:1340030	Crlf1	1	1	1	1	0
ENSMUSG00000042419	MGI:1340031	Nfkbil1	1	0	0	0	0
ENSMUSG00000063531	MGI:1340034	Sema3e	1	1	0	1	0
ENSMUSG00000028613	MGI:1340044	Lrp8	1	0	0	0	0
ENSMUSG00000031785	MGI:1340051	Gpr56	1	0	0	0	0
ENSMUSG00000000627	MGI:1340055	Sema4f	1	1	1	0	0
ENSMUSG00000019970	MGI:1340062	Sgk1	0	0	0	1	1
ENSMUSG00000026496	MGI:1340806	Parp1	1	0	0	0	0
ENSMUSG00000025134	MGI:1341044	Thoc4	1	0	0	0	0
ENSMUSG00000019428	MGI:1341070	Fkbp8	1	1	1	1	0
ENSMUSG00000063015	MGI:1341077	Ccni	1	0	0	1	0
ENSMUSG00000031529	MGI:1341087	Tnks	1	1	1	1	1
ENSMUSG00000022074	MGI:1341090	Tnfrsf10b	1	1	0	1	0
ENSMUSG00000032643	MGI:1341092	Fhl3	1	0	1	1	1
ENSMUSG00000036023	MGI:1341112	Parp2	1	1	1	1	1
ENSMUSG00000037313	MGI:1341163	Tacc3	1	0	0	0	0
ENSMUSG00000020232	MGI:1341190	Hmg20b	1	0	0	0	0
ENSMUSG00000032834	MGI:1341200	Pwp2	1	1	0	0	0
ENSMUSG00000030061	MGI:1341217	Uba3	1	0	0	0	0
ENSMUSG00000035274	MGI:1341264	Tpbg	1	1	1	1	1
ENSMUSG00000053819	MGI:1341265	Camk2d	1	1	0	1	0
ENSMUSG00000092607	MGI:1341284	Scnm1	1	0	0	0	0
ENSMUSG00000024049	MGI:1341430	Myom1	1	1	1	1	0
ENSMUSG00000027312	MGI:1341628	Atrn	1	0	0	0	0
ENSMUSG00000021302	MGI:1341724	Ggps1	1	0	0	0	0
ENSMUSG00000025047	MGI:1341788	Pdcd11	1	1	1	1	1
ENSMUSG00000034673	MGI:1341793	Pbx2	0	1	1	0	0
ENSMUSG00000005125	MGI:1341799	Ndrg1	1	0	0	0	0
ENSMUSG00000053846	MGI:1341803	Lipg	1	0	0	1	0
ENSMUSG00000040731	MGI:1341822	Eif4h	1	1	0	0	0
ENSMUSG00000031668	MGI:1341830	Eif2ak3	1	0	0	0	1
ENSMUSG00000018507	MGI:1341836	Trpv2	1	0	0	0	1
ENSMUSG00000038058	MGI:1341839	Nod1	1	1	0	0	0
ENSMUSG00000025907	MGI:1341850	Rb1cc1	1	1	1	0	0
ENSMUSG00000029554	MGI:1341857	Mad1l1	1	0	0	0	1
ENSMUSG00000021033	MGI:1341859	Gstz1	1	0	0	1	1
ENSMUSG00000028245	MGI:1341864	Nsmaf	1	1	0	0	0
ENSMUSG00000007411	MGI:1341865	Mark3	1	1	1	0	1
ENSMUSG00000023104	MGI:1341868	Rfc2	1	1	0	0	0
ENSMUSG00000003068	MGI:1341870	Stk11	1	0	0	0	0
ENSMUSG00000024812	MGI:1341872	Tjp2	1	1	1	0	1
ENSMUSG00000024772	MGI:1341878	Ehd1	1	0	0	0	0
ENSMUSG00000019789	MGI:1341884	Hey2	1	0	0	0	0
ENSMUSG00000022178	MGI:1341886	Jub	1	1	1	1	0
ENSMUSG00000022201	MGI:1341890	Zfr	1	1	0	1	1
ENSMUSG00000079442	MGI:1341894	St6galnac4	1	0	1	0	0
ENSMUSG00000075012	MGI:1341907	Fjx1	1	0	1	0	0
ENSMUSG00000026667	MGI:1341908	Uhmk1	1	1	1	1	0
ENSMUSG00000021048	MGI:1342005	Mthfd1	1	0	1	1	1
ENSMUSG00000006731	MGI:1342057	B4galnt1	1	1	1	1	1
ENSMUSG00000022404	MGI:1342248	Slc25a17	1	0	1	0	0
ENSMUSG00000004383	MGI:1342270	Large	1	0	0	0	0
ENSMUSG00000025068	MGI:1342273	Gsto1	1	0	1	1	1
ENSMUSG00000031482	MGI:1342274	Slc25a15	1	0	0	0	0
ENSMUSG00000017756	MGI:1342283	Slc12a7	1	1	0	0	1
ENSMUSG00000002812	MGI:1342286	Flii	1	1	1	0	0
ENSMUSG00000003032	MGI:1342287	Klf4	1	1	1	1	0
ENSMUSG00000023809	MGI:1342290	Rps6ka2	1	0	0	0	0
ENSMUSG00000020361	MGI:1342292	Hspa4	1	0	0	0	0
ENSMUSG00000030421	MGI:1342294	C80913	1	1	0	1	1
ENSMUSG00000003868	MGI:1342299	Ruvbl2	1	0	0	0	0
ENSMUSG00000020537	MGI:1342307	Drg2	1	1	1	0	1
ENSMUSG00000022377	MGI:1342335	Asap1	1	1	0	0	0
ENSMUSG00000026305	MGI:1342770	Lrrfip1	1	1	1	1	0
ENSMUSG00000055148	MGI:1342772	Klf2	0	1	1	1	0
ENSMUSG00000029178	MGI:1342773	Klf3	1	1	0	0	0
ENSMUSG00000037070	MGI:1343045	Rbmxrt	1	0	0	0	0
ENSMUSG00000057522	MGI:1343085	Spop	1	1	0	0	0
ENSMUSG00000035268	MGI:1343086	Pkig	1	1	0	1	0
ENSMUSG00000024454	MGI:1343091	Hdac3	1	0	1	0	0
ENSMUSG00000020877	MGI:1343092	Scrn2	1	0	0	0	1
ENSMUSG00000020918	MGI:1343101	Kat2a	1	0	0	0	0
ENSMUSG00000032757	MGI:1343104	Bet1	1	0	1	1	1
ENSMUSG00000062580	MGI:1343131	Timm17a	1	1	1	1	1
ENSMUSG00000046229	MGI:1343132	Scand1	0	1	1	1	1
ENSMUSG00000020873	MGI:1343133	Slc35b1	1	1	0	0	0
ENSMUSG00000021764	MGI:1343135	Ndufs4	0	1	1	0	0
ENSMUSG00000029622	MGI:1343142	Arpc1b	1	1	1	1	0
ENSMUSG00000031516	MGI:1343154	Dctn6	1	1	0	1	1
ENSMUSG00000014349	MGI:1343160	Ube2z	1	0	0	0	0
ENSMUSG00000009293	MGI:1343188	Ube2g2	1	1	0	0	0
ENSMUSG00000002949	MGI:1343262	Timm44	1	0	0	1	0
ENSMUSG00000020457	MGI:1343297	Drg1	1	0	0	0	0
ENSMUSG00000064023	MGI:1343327	Klk8	1	0	0	0	0
ENSMUSG00000023348	MGI:1343458	Trip6	1	0	1	1	1
ENSMUSG00000031985	MGI:1343460	Gnpat	1	1	0	0	1
ENSMUSG00000066979	MGI:1343463	Bub3	1	1	0	0	0
ENSMUSG00000029213	MGI:1343485	Commd8	1	1	0	0	0
ENSMUSG00000028402	MGI:1343489	Mpdz	1	0	1	1	0
ENSMUSG00000037805	MGI:1343877	Rpl10a	1	0	0	0	0
ENSMUSG00000005370	MGI:1343961	Msh6	1	0	0	0	0
ENSMUSG00000024238	MGI:1344313	Zeb1	1	0	0	1	0
ENSMUSG00000061374	MGI:1344336	Fiz1	1	0	0	0	0
ENSMUSG00000074934	MGI:1344337	Grem1	0	1	1	0	1
ENSMUSG00000023800	MGI:1344338	Tiam2	1	1	0	1	1
ENSMUSG00000000346	MGI:1344344	Dazap2	1	0	0	0	0
ENSMUSG00000090935	MGI:1344347	Synj2bp	1	0	0	0	0
ENSMUSG00000045078	MGI:1344349	Rnf216	1	1	0	1	0
ENSMUSG00000038914	MGI:1344352	Dido1	1	0	0	0	0
ENSMUSG00000019794	MGI:1344353	Katna1	1	1	1	1	1
ENSMUSG00000064145	MGI:1344361	Arih2	1	0	1	0	1
ENSMUSG00000025234	MGI:1344363	Arih1	1	1	0	1	1
ENSMUSG00000050069	MGI:1344367	Grem2	1	1	1	1	0
ENSMUSG00000030647	MGI:1344370	Ndufc2	1	0	1	1	1
ENSMUSG00000027466	MGI:1344372	Rbck1	1	0	0	0	1
ENSMUSG00000001687	MGI:1344373	Ubl3	1	0	0	1	0
ENSMUSG00000002731	MGI:1344375	Prkra	1	0	1	0	0
ENSMUSG00000063870	MGI:1344380	Chd4	1	1	1	0	0
ENSMUSG00000040713	MGI:1344382	Creg1	1	1	0	0	1
ENSMUSG00000017210	MGI:1344385	Med24	1	0	0	0	0
ENSMUSG00000021892	MGI:1344391	Sh3bp5	1	1	0	1	0
ENSMUSG00000026270	MGI:1344392	Capn10	1	1	0	0	0
ENSMUSG00000018474	MGI:1344395	Chd3	1	1	1	1	1
ENSMUSG00000031954	MGI:1344403	Cfdp1	1	0	0	0	0
ENSMUSG00000021918	MGI:1344404	Nek4	1	0	0	0	0
ENSMUSG00000021009	MGI:1344406	Ptpn21	1	0	0	1	0
ENSMUSG00000026872	MGI:1344407	Zeb2	1	1	0	0	0
ENSMUSG00000032959	MGI:1344408	Pebp1	0	1	0	1	0
ENSMUSG00000021798	MGI:1344412	Ldb3	1	0	0	1	0
ENSMUSG00000028345	MGI:1344413	Tex10	1	0	0	0	0
ENSMUSG00000006050	MGI:1344414	Sra1	1	0	0	0	0
ENSMUSG00000042508	MGI:1344415	Dmtf1	1	1	1	1	1
ENSMUSG00000031575	MGI:1344416	Ash2l	1	0	0	0	0
ENSMUSG00000048387	MGI:1344424	Osr1	1	0	0	0	0
ENSMUSG00000025366	MGI:1344426	Esyt1	1	0	0	0	0
ENSMUSG00000022114	MGI:1345138	Spry2	1	1	0	1	0
ENSMUSG00000037211	MGI:1345139	Spry1	0	1	1	1	1
ENSMUSG00000024474	MGI:1345142	Ik	1	0	0	0	0
ENSMUSG00000023868	MGI:1345143	Pde10a	1	1	0	0	0
ENSMUSG00000024427	MGI:1345144	Spry4	1	1	0	0	0
ENSMUSG00000019699	MGI:1345147	Akt3	1	1	0	0	0
ENSMUSG00000017499	MGI:1345150	Cdc6	1	0	0	0	0
ENSMUSG00000016664	MGI:1345153	Pacsin2	1	0	0	0	0
ENSMUSG00000025964	MGI:1345162	Adam23	1	0	1	1	1
ENSMUSG00000005057	MGI:1345171	Sh2b2	1	0	0	0	0
ENSMUSG00000068134	MGI:1345179	Zfp120	1	0	0	0	0
ENSMUSG00000022594	MGI:1345180	Lynx1	1	0	0	1	0
ENSMUSG00000031561	MGI:1345183	Odz3	1	0	0	0	0
ENSMUSG00000020840	MGI:1345186	Blmh	0	1	1	1	1
ENSMUSG00000002871	MGI:1345190	Tpra1	1	1	1	1	1
ENSMUSG00000025487	MGI:1345192	Psmd13	1	0	0	0	0
ENSMUSG00000026674	MGI:1345277	Ddr2	1	1	1	1	0
ENSMUSG00000024891	MGI:1345278	Slc29a2	1	1	0	0	0
ENSMUSG00000023030	MGI:1345279	Slc11a2	1	1	1	1	0
ENSMUSG00000037434	MGI:1345281	Slc30a1	1	1	0	0	0
ENSMUSG00000005802	MGI:1345282	Slc30a4	1	1	1	1	0
ENSMUSG00000003528	MGI:1345283	Slc25a1	1	0	0	0	0
ENSMUSG00000028293	MGI:1345622	Slc35a1	1	0	1	0	1
ENSMUSG00000040354	MGI:1345633	Mars	1	0	0	0	1
ENSMUSG00000031751	MGI:1345634	Amfr	1	0	0	0	0
ENSMUSG00000025231	MGI:1345643	Sufu	1	0	0	0	0
ENSMUSG00000021639	MGI:1345669	Gtf2h2	1	0	0	0	0
ENSMUSG00000032715	MGI:1345675	Trib3	1	0	0	1	1
ENSMUSG00000024835	MGI:1345963	Coro1b	1	0	0	0	0
ENSMUSG00000004530	MGI:1345964	Coro1c	1	1	0	0	0
ENSMUSG00000039515	MGI:1346006	Ppp2r4	1	0	0	0	1
ENSMUSG00000021662	MGI:1346016	Rgnef	1	0	1	1	1
ENSMUSG00000015357	MGI:1346017	Clpx	1	1	1	1	1
ENSMUSG00000032548	MGI:1346021	Slco2a1	1	1	1	0	0
ENSMUSG00000046982	MGI:1346031	Tshz1	1	0	0	1	0
ENSMUSG00000026245	MGI:1346035	Farsb	1	0	1	1	0
ENSMUSG00000032171	MGI:1346036	Pin1	1	0	0	0	0
ENSMUSG00000018761	MGI:1346040	Mpdu1	1	0	0	0	0
ENSMUSG00000033174	MGI:1346042	Mgll	1	0	0	0	0
ENSMUSG00000038508	MGI:1346047	Gdf15	1	1	1	1	0
ENSMUSG00000040151	MGI:1346049	Hs2st1	1	1	1	1	0
ENSMUSG00000027203	MGI:1346051	Dut	1	0	0	0	1
ENSMUSG00000021000	MGI:1346056	Ctage5	1	0	0	0	0
ENSMUSG00000021417	MGI:1346064	Eci2	1	0	1	0	0
ENSMUSG00000032869	MGI:1346072	Psmf1	1	0	0	0	1
ENSMUSG00000018765	MGI:1346074	Fxr2	1	0	1	0	0
ENSMUSG00000029436	MGI:1346076	Mmp17	1	0	0	1	1
ENSMUSG00000023277	MGI:1346078	Twf2	1	0	1	1	1
ENSMUSG00000027937	MGI:1346082	Jtb	1	1	1	0	1
ENSMUSG00000021418	MGI:1346084	Rpp40	1	0	0	0	0
ENSMUSG00000021186	MGI:1346091	Fbln5	1	0	1	1	1
ENSMUSG00000030603	MGI:1346093	Psmc4	1	0	1	0	0
ENSMUSG00000029111	MGI:1346098	Whsc2	1	0	0	0	0
ENSMUSG00000000078	MGI:1346318	Klf6	0	1	1	0	0
ENSMUSG00000043866	MGI:1346320	Taf10	1	1	0	0	1
ENSMUSG00000022894	MGI:1346321	Adamts5	1	1	0	1	1
ENSMUSG00000058571	MGI:1346322	Gpc6	1	1	0	1	0
ENSMUSG00000021453	MGI:1346325	Gadd45g	1	0	0	0	0
ENSMUSG00000002257	MGI:1346328	Def6	1	0	0	0	0
ENSMUSG00000045948	MGI:1346333	Mrps12	1	0	0	1	0
ENSMUSG00000071646	MGI:1346340	Mta2	1	1	0	0	0
ENSMUSG00000036503	MGI:1346341	Rnf13	1	0	0	0	0
ENSMUSG00000058444	MGI:1346345	Map2k5	1	0	0	0	0
ENSMUSG00000028049	MGI:1346346	Scamp3	1	0	1	0	0
ENSMUSG00000001034	MGI:1346347	Mapk7	1	0	0	0	0
ENSMUSG00000051316	MGI:1346348	Taf7	1	0	0	0	0
ENSMUSG00000054520	MGI:1346349	Sh3bp2	1	0	0	0	1
ENSMUSG00000040188	MGI:1346518	Scamp2	1	0	0	0	0
ENSMUSG00000029156	MGI:1346523	Sgcb	1	0	0	0	1
ENSMUSG00000020354	MGI:1346525	Sgcd	1	0	0	0	0
ENSMUSG00000032086	MGI:1346542	Bace1	1	0	0	1	0
ENSMUSG00000024955	MGI:1346831	Esrra	1	1	0	0	0
ENSMUSG00000063358	MGI:1346858	Mapk1	1	0	0	0	0
ENSMUSG00000063065	MGI:1346859	Mapk3	1	0	0	0	0
ENSMUSG00000021936	MGI:1346861	Mapk8	1	0	0	1	0
ENSMUSG00000020366	MGI:1346862	Mapk9	1	0	0	0	0
ENSMUSG00000004864	MGI:1346864	Mapk13	1	0	0	0	0
ENSMUSG00000053436	MGI:1346865	Mapk14	1	0	1	0	1
ENSMUSG00000004936	MGI:1346866	Map2k1	1	1	0	0	0
ENSMUSG00000035027	MGI:1346867	Map2k2	1	0	0	0	0
ENSMUSG00000018932	MGI:1346868	Map2k3	1	1	1	0	0
ENSMUSG00000033352	MGI:1346869	Map2k4	1	1	1	0	0
ENSMUSG00000002948	MGI:1346871	Map2k7	1	1	1	1	0
ENSMUSG00000024383	MGI:1346873	Map3k2	1	0	0	0	0
ENSMUSG00000020700	MGI:1346874	Map3k3	1	0	0	0	0
ENSMUSG00000014426	MGI:1346875	Map3k4	1	1	0	0	0
ENSMUSG00000028284	MGI:1346877	Map3k7	1	1	1	1	1
ENSMUSG00000040390	MGI:1346879	Map3k10	1	1	0	1	0
ENSMUSG00000004054	MGI:1346880	Map3k11	1	1	0	0	1
ENSMUSG00000023050	MGI:1346881	Map3k12	1	0	1	0	0
ENSMUSG00000024948	MGI:1346883	Map4k2	1	0	0	0	0
ENSMUSG00000003662	MGI:1346998	Ciao1	1	0	1	1	1
ENSMUSG00000028670	MGI:1347000	Lypla2	0	0	1	1	0
ENSMUSG00000021900	MGI:1347001	Btd	1	0	0	0	0
ENSMUSG00000004105	MGI:1347002	Angptl2	1	0	0	0	0
ENSMUSG00000033902	MGI:1347004	Mapkbp1	1	1	1	1	0
ENSMUSG00000030751	MGI:1347005	Psma1	1	0	0	0	0
ENSMUSG00000032374	MGI:1347007	Plod2	1	1	1	0	0
ENSMUSG00000004846	MGI:1347008	Plod3	1	0	1	1	1
ENSMUSG00000068749	MGI:1347009	Psma5	1	0	1	0	0
ENSMUSG00000069744	MGI:1347014	Psmb3	1	0	1	0	0
ENSMUSG00000026761	MGI:1347043	Orc4	1	0	0	0	0
ENSMUSG00000029012	MGI:1347044	Orc5	1	0	0	0	0
ENSMUSG00000040782	MGI:1347046	Rfwd2	1	1	0	0	0
ENSMUSG00000036636	MGI:1347048	Clcn7	1	1	1	1	1
ENSMUSG00000029016	MGI:1347049	Clcn6	1	1	1	1	0
ENSMUSG00000041890	MGI:1347053	Git2	1	0	1	0	0
ENSMUSG00000052102	MGI:1347054	Gnpda1	1	1	0	0	1
ENSMUSG00000036775	MGI:1347059	Decr2	1	1	0	1	0
ENSMUSG00000027230	MGI:1347062	Creb3l1	1	0	0	0	0
ENSMUSG00000028159	MGI:1347063	Dapp1	1	0	0	1	0
ENSMUSG00000030291	MGI:1347064	Med21	0	1	0	0	1
ENSMUSG00000027566	MGI:1347070	Psma7	1	0	0	0	0
ENSMUSG00000049421	MGI:1347071	Zfp260	1	0	0	0	0
ENSMUSG00000039183	MGI:1347072	Nubp2	1	1	1	1	1
ENSMUSG00000022503	MGI:1347073	Nubp1	1	1	0	1	0
ENSMUSG00000027428	MGI:1347074	Rbbp9	0	0	1	0	0
ENSMUSG00000027799	MGI:1347075	Nbea	1	0	0	0	0
ENSMUSG00000046364	MGI:1347076	Rpl27a	1	0	0	0	1
ENSMUSG00000049658	MGI:1347077	Bdp1	1	0	0	0	0
ENSMUSG00000074886	MGI:1347078	Grk6	1	0	0	0	0
ENSMUSG00000037029	MGI:1347092	Zfp146	1	1	0	0	0
ENSMUSG00000055932	MGI:1347093	Fto	1	1	1	1	0
ENSMUSG00000021911	MGI:1347094	Parg	1	1	0	1	0
ENSMUSG00000002885	MGI:1347095	Cd97	1	1	0	1	1
ENSMUSG00000031808	MGI:1347098	Slc27a1	1	0	1	1	0
ENSMUSG00000002602	MGI:1347244	Axl	1	1	0	0	0
ENSMUSG00000038429	MGI:1347343	Usp5	1	0	0	0	0
ENSMUSG00000007617	MGI:1347345	Homer1	1	1	0	0	0
ENSMUSG00000032363	MGI:1347346	Adamts7	1	0	1	0	0
ENSMUSG00000059316	MGI:1347347	Slc27a4	1	1	1	1	0
ENSMUSG00000046169	MGI:1347348	Adamts6	1	0	1	1	0
ENSMUSG00000028833	MGI:1347351	Ncdn	1	1	1	0	0
[truncated: 6,547 more rows]
