# Supplementary material for: The Genetic Architecture of the Genome-Wide Transcriptional Response to ER Stress in the Mouse
Source: PLoS Genet. 2015 Feb 4;11(2):e1004924. doi: 10.1371/journal.pgen.1004924 (PMC4412289; doi:10.1371/journal.pgen.1004924)
Supplement: S13 Table — (XLSX) [file pgen.1004924.s016.xlsx]

## Sheet: shared trans- control
Supplemental Table 13: Shared trans-regulatory differences under control conditions
Ensembl	ID	Symbol	# informative	shared?	# shared	CAST	129	NOD	NZO	WSB	strain effect (X2)
											p	q
ENSMUSG00000029661	MGI:88468	Col1a2	4	shared	3	1	1	0	1	NA	1.44151e-37	3.312e-36		NA = not informative
ENSMUSG00000027204	MGI:95489	Fbn1	5	shared	2	0	1	0	0	1	6.27059e-20	7.2105e-19
ENSMUSG00000037411	MGI:97608	Serpine1	5	shared	3	1	1	1	0	0	2.15077e-16	1.64833e-15
ENSMUSG00000031502	MGI:88454	Col4a1	4	shared	3	0	1	NA	1	1	6.67855e-12	3.841e-11
ENSMUSG00000031503	MGI:88455	Col4a2	4	shared	3	0	1	NA	1	1	3.67863e-06	1.6928e-05
ENSMUSG00000068196	MGI:88463	Col8a1	5	shared	3	0	0	1	1	1	1.5503e-05	5.94167e-05
ENSMUSG00000032332	MGI:88448	Col12a1	5	shared	2	0	0	0	1	1	0.00943304	0.0309943
ENSMUSG00000032216	MGI:97297	Nedd4	4	shared	4	1	1	1	1	NA	0.0221341	0.0636355
ENSMUSG00000052727	MGI:1306778	Mtap1b	5	shared	2	0	1	1	0	0	0.0437826	0.109218
ENSMUSG00000038539	MGI:2141857	Atf5	4	shared	4	1	1	NA	1	1	0.047486	0.109218
ENSMUSG00000022367	MGI:107821	Has2	4	shared	2	1	NA	0	1	0	0.0617288	0.129069
ENSMUSG00000074934	MGI:1344337	Grem1	5	shared	2	1	0	0	0	1	0.0940156	0.16701
ENSMUSG00000032291	MGI:88490	Crabp1	2	shared	2	1	NA	NA	NA	1	0.0943968	0.16701
ENSMUSG00000020044	MGI:98754	Timp3	4	shared	2	0	NA	0	1	1	0.106702	0.175297
ENSMUSG00000026728	MGI:98932	Vim	2	shared	2	1	NA	NA	NA	1	0.158674	0.243299
ENSMUSG00000030084	MGI:107685	Plxna1	5	shared	2	0	1	1	0	0	0.20594	0.296038
ENSMUSG00000056481	MGI:1917695	Cd248	3	shared	2	1	NA	1	NA	0	0.261417	0.353681
ENSMUSG00000021806	MGI:1298229	Nid2	5	shared	2	0	0	0	1	1	0.285942	0.36537
ENSMUSG00000011179	MGI:97402	Odc1	5	shared	3	1	1	1	0	0	0.351406	0.425386
ENSMUSG00000040711	MGI:2442062	Sh3pxd2b	4	shared	2	1	NA	1	0	0	0.434041	0.499147
ENSMUSG00000028128	MGI:88381	F3	4	shared	2	0	NA	1	1	0	0.512227	0.56101
ENSMUSG00000021838	MGI:1921730	Samd4	5	shared	2	0	1	1	0	0	0.568227	0.594055
ENSMUSG00000026483	MGI:2137237	Fam129a	3	shared	2	1	NA	1	NA	0	0.973754	0.973754
ENSMUSG00000027597	MGI:87968	Ahcy	5	unique	1	1	0	0	0	0	--	--
ENSMUSG00000004105	MGI:1347002	Angptl2	1	unique	1	1	NA	NA	NA	NA	--	--
ENSMUSG00000005442	MGI:1918972	Cic	3	unique	1	1	0	NA	NA	0	--	--
ENSMUSG00000004098	MGI:1858212	Col5a3	5	unique	1	1	0	0	0	0	--	--
ENSMUSG00000032911	MGI:2153093	Cspg4	2	unique	1	1	NA	NA	NA	0	--	--
ENSMUSG00000021939	MGI:88561	Ctsb	4	unique	1	1	NA	0	0	0	--	--
ENSMUSG00000078812	MGI:106248	Eif5a	2	unique	1	1	0	NA	NA	NA	--	--
ENSMUSG00000021996	MGI:95421	Esd	4	unique	1	0	0	NA	0	1	--	--
ENSMUSG00000039191	MGI:96522	Rbpj	3	unique	1	0	NA	0	NA	1	--	--
ENSMUSG00000028369	MGI:1928849	Svep1	4	unique	1	0	0	0	NA	1	--	--
ENSMUSG00000030218	MGI:96976	Mgp	5	unique	1	0	0	0	1	0	--	--
ENSMUSG00000025579	MGI:95609	Gaa	2	unique	1	1	NA	NA	NA	0	--	--
ENSMUSG00000032715	MGI:1345675	Trib3	3	unique	1	0	1	0	NA	NA	--	--
ENSMUSG00000028776	MGI:2137617	Tinagl1	3	unique	1	0	0	NA	NA	1	--	--
ENSMUSG00000027230	MGI:1347062	Creb3l1	3	unique	1	0	NA	0	NA	1	--	--
ENSMUSG00000034485	MGI:1919815	Uaca	3	unique	1	0	1	NA	NA	0	--	--
ENSMUSG00000037820	MGI:98731	Tgm2	3	unique	1	0	1	NA	NA	0	--	--
ENSMUSG00000000753	MGI:108080	Serpinf1	4	unique	1	0	1	0	NA	0	--	--
ENSMUSG00000027907	MGI:1338798	S100a11	4	unique	1	0	1	0	NA	0	--	--
ENSMUSG00000028656	MGI:88262	Cap1	4	unique	1	0	1	0	NA	0	--	--
ENSMUSG00000028793	MGI:1922484	Rnf19b	4	unique	1	0	1	0	NA	0	--	--
ENSMUSG00000035181	MGI:2444133	Heatr5a	4	unique	1	0	1	0	NA	0	--	--
ENSMUSG00000022483	MGI:88452	Col2a1	4	unique	1	0	0	0	1	NA	--	--
ENSMUSG00000000184	MGI:88314	Ccnd2	4	unique	1	0	NA	0	1	0	--	--
ENSMUSG00000043441	MGI:2443628	Gpr149	4	unique	1	NA	0	0	1	0	--	--
ENSMUSG00000026249	MGI:101780	Serpine2	5	unique	1	0	0	0	1	0	--	--
ENSMUSG00000027254	MGI:1306776	Mtap1a	5	unique	1	0	0	0	1	0	--	--
ENSMUSG00000050335	MGI:96778	Lgals3	5	unique	1	0	0	0	1	0	--	--
ENSMUSG00000008348	MGI:98889	Ubc	4	unique	1	0	0	1	0	NA	--	--
ENSMUSG00000028351	MGI:1928478	Dbc1	3	unique	1	0	NA	NA	0	1	--	--
ENSMUSG00000031486	MGI:1925810	Gpr124	3	unique	1	0	NA	NA	0	1	--	--
ENSMUSG00000026478	MGI:99914	Lamc1	5	unique	1	0	0	0	0	1	--	--
ENSMUSG00000032855	MGI:97603	Pkd1	5	unique	1	0	0	0	0	1	--	--
ENSMUSG00000028494	MGI:87920	Plin2	4	unique	1	0	1	NA	0	0	--	--
ENSMUSG00000017466	MGI:98753	Timp2	4	unique	1	0	NA	1	0	0	--	--
ENSMUSG00000025278	MGI:2446089	Flnb	5	unique	1	0	0	1	0	0	--	--
ENSMUSG00000032679	MGI:109177	Cd59a	5	unique	1	0	0	1	0	0	--	--
ENSMUSG00000042331	MGI:2442356	Specc1	5	unique	1	0	0	1	0	0	--	--
ENSMUSG00000029816	MGI:1934765	Gpnmb	1	unique	1	1	NA	NA	NA	NA	--	--
ENSMUSG00000001525	MGI:107812	Tubb5	5	unique	1	0	1	0	0	0	--	--
ENSMUSG00000003534	MGI:99216	Ddr1	5	unique	1	0	1	0	0	0	--	--
ENSMUSG00000015647	MGI:105382	Lama5	5	unique	1	0	1	0	0	0	--	--
ENSMUSG00000018340	MGI:88255	Anxa6	5	unique	1	0	1	0	0	0	--	--
ENSMUSG00000020649	MGI:98181	Rrm2	5	unique	1	0	1	0	0	0	--	--
ENSMUSG00000026042	MGI:88458	Col5a2	5	unique	1	0	1	0	0	0	--	--
ENSMUSG00000027276	MGI:1095416	Jag1	5	unique	1	0	1	0	0	0	--	--
ENSMUSG00000027313	MGI:1916315	Chac1	5	unique	1	0	1	0	0	0	--	--
ENSMUSG00000030536	MGI:1352757	Iqgap1	5	unique	1	0	1	0	0	0	--	--
ENSMUSG00000063524	MGI:95393	Eno1	5	unique	1	0	1	0	0	0	--	--
ENSMUSG00000028763	MGI:96257	Hspg2	2	unique	1	1	NA	NA	NA	0	--	--
ENSMUSG00000031447	MGI:96745	Lamp1	1	unique	1	1	NA	NA	NA	NA	--	--
ENSMUSG00000063229	MGI:96759	Ldha	3	unique	1	1	0	NA	NA	0	--	--
ENSMUSG00000000693	MGI:1337004	Loxl3	5	unique	1	1	0	0	0	0	--	--
ENSMUSG00000024940	MGI:1101355	Ltbp3	3	unique	1	1	NA	0	NA	0	--	--
ENSMUSG00000031740	MGI:97009	Mmp2	5	unique	1	1	0	0	0	0	--	--
ENSMUSG00000058799	MGI:1855693	Nap1l1	1	unique	1	1	NA	NA	NA	NA	--	--
ENSMUSG00000026234	MGI:97286	Ncl	4	unique	1	1	0	NA	0	0	--	--
ENSMUSG00000057113	MGI:106184	Npm1	4	unique	1	1	NA	0	0	0	--	--
ENSMUSG00000023034	MGI:1352454	Nr4a1	3	unique	1	1	NA	NA	0	0	--	--
ENSMUSG00000038264	MGI:1306826	Sema7a	2	unique	1	0	1	NA	NA	NA	--	--
ENSMUSG00000002020	MGI:99502	Ltbp2	2	unique	1	0	NA	NA	NA	1	--	--
ENSMUSG00000026475	MGI:108407	Rgs16	2	unique	1	0	NA	NA	NA	1	--	--
ENSMUSG00000028370	MGI:97479	Pappa	2	unique	1	0	NA	NA	NA	1	--	--
ENSMUSG00000057738	MGI:98386	Spna2	2	unique	1	0	NA	NA	NA	1	--	--
ENSMUSG00000070047	MGI:109168	Fat1	2	unique	1	0	NA	NA	NA	1	--	--
ENSMUSG00000038172	MGI:1917113	Ttc39b	3	unique	1	0	0	NA	NA	1	--	--
ENSMUSG00000052353	MGI:2443629	9930013L23Rik	3	unique	1	0	NA	0	NA	1	--	--
ENSMUSG00000022894	MGI:1346321	Adamts5	4	unique	1	0	0	0	NA	1	--	--
ENSMUSG00000025810	MGI:106206	Nrp1	4	unique	1	0	0	0	NA	1	--	--
ENSMUSG00000046768	MGI:1931551	Rhoj	4	unique	1	0	0	0	NA	1	--	--
ENSMUSG00000011752	MGI:97552	Pgam1	1	unique	1	1	NA	NA	NA	NA	--	--
ENSMUSG00000039361	MGI:2385902	Picalm	4	unique	1	1	NA	0	0	0	--	--
ENSMUSG00000027750	MGI:1926321	Postn	3	unique	1	1	NA	0	NA	0	--	--
ENSMUSG00000026238	MGI:97803	Ptma	1	unique	1	1	NA	NA	NA	NA	--	--
ENSMUSG00000044533	MGI:105110	Rps2	2	unique	1	1	NA	NA	NA	0	--	--
ENSMUSG00000030978	MGI:98180	Rrm1	5	unique	1	1	0	0	0	0	--	--
ENSMUSG00000022565	MGI:1277961	Plec	3	unique	1	0	NA	1	NA	0	--	--
ENSMUSG00000026837	MGI:88457	Col5a1	3	unique	1	0	NA	1	NA	0	--	--
ENSMUSG00000027397	MGI:108392	Slc20a1	2	unique	1	1	NA	NA	NA	0	--	--
ENSMUSG00000023885	MGI:98738	Thbs2	5	unique	1	1	0	0	0	0	--	--
ENSMUSG00000032531	MGI:1929286	Amotl2	3	unique	1	NA	1	0	NA	0	--	--
ENSMUSG00000022892	MGI:88059	App	2	unique	1	0	NA	NA	1	NA	--	--
ENSMUSG00000047414	MGI:3603594	Flrt2	2	unique	1	0	NA	NA	1	NA	--	--
ENSMUSG00000001506	MGI:88467	Col1a1	3	unique	1	0	NA	0	1	NA	--	--
ENSMUSG00000026069	MGI:98427	Il1rl1	4	unique	1	0	0	0	1	NA	--	--
ENSMUSG00000051339	MGI:1920194	2900026A02Rik	4	unique	1	0	0	0	1	NA	--	--
ENSMUSG00000053626	MGI:106923	Tll1	3	unique	1	0	NA	NA	1	0	--	--
ENSMUSG00000007888	MGI:1340030	Crlf1	4	unique	1	0	0	NA	1	0	--	--
ENSMUSG00000056427	MGI:1315202	Slit3	4	unique	1	0	NA	0	1	0	--	--
ENSMUSG00000030409	MGI:94906	Dmpk	5	unique	1	0	0	0	1	0	--	--
ENSMUSG00000031530	MGI:2442191	Dusp4	5	unique	1	0	0	0	1	0	--	--
ENSMUSG00000038393	MGI:1889549	Txnip	5	unique	1	0	0	0	1	0	--	--
ENSMUSG00000004655	MGI:103201	Aqp1	4	unique	1	0	1	0	0	NA	--	--
ENSMUSG00000035898	MGI:1913894	Uba6	4	unique	1	0	1	0	0	NA	--	--
ENSMUSG00000021281	MGI:104960	Tnfaip2	2	unique	1	1	NA	NA	NA	0	--	--
ENSMUSG00000014599	MGI:1339753	Csf1	2	unique	1	NA	NA	NA	0	1	--	--
ENSMUSG00000034868	MGI:107494	Myl12b	4	unique	1	0	NA	0	0	1	--	--
ENSMUSG00000074364	MGI:2154274	Ehd2	4	unique	1	0	NA	0	0	1	--	--
ENSMUSG00000022665	MGI:1915146	Ccdc80	5	unique	1	0	0	0	0	1	--	--
ENSMUSG00000055044	MGI:1860611	Pdlim1	5	unique	1	0	0	0	0	1	--	--
ENSMUSG00000023905	MGI:1351484	Tnfrsf12a	4	unique	1	1	0	0	0	NA	--	--
ENSMUSG00000040249	MGI:96828	Lrp1	4	unique	1	0	NA	1	0	0	--	--
ENSMUSG00000027248	MGI:95834	Pdia3	5	unique	1	0	0	1	0	0	--	--
ENSMUSG00000032366	MGI:98809	Tpm1	5	unique	1	0	0	1	0	0	--	--
ENSMUSG00000036181	MGI:1931526	Hist1h1c	5	unique	1	0	0	1	0	0	--	--
ENSMUSG00000023004	MGI:107804	Tuba1b	1	unique	1	1	NA	NA	NA	NA	--	--
ENSMUSG00000022175	MGI:1929480	Lrp10	5	unique	1	0	1	0	0	0	--	--
ENSMUSG00000028108	MGI:103060	Ecm1	5	unique	1	0	1	0	0	0	--	--
ENSMUSG00000032135	MGI:1933966	Mcam	5	unique	1	0	1	0	0	0	--	--
ENSMUSG00000042406	MGI:88096	Atf4	5	unique	1	0	1	0	0	0	--	--
ENSMUSG00000043091	MGI:1095409	Tuba1c	1	unique	1	1	NA	NA	NA	NA	--	--

## Sheet: shared trans- Tm
Supplemental Table 13: Shared trans-regulatory differences under TM conditions
Ensembl	ID	Symbol	# informative	shared?	# shared	CAST	129	NOD	NZO	WSB	strain effect (X2)
											p	q
ENSMUSG00000026837	MGI:88457	Col5a1	3	shared	2	1	NA	1	NA	0	5.9229e-73	8.288e-72		NA = not informative
ENSMUSG00000040225	MGI:1913754	Prrc2c	2	shared	2	1	NA	NA	NA	1	8.06112e-25	5.642e-24
ENSMUSG00000032366	MGI:98809	Tpm1	5	shared	2	0	1	0	1	0	5.04086e-24	2.352e-23
ENSMUSG00000031770	MGI:1927406	Herpud1	5	shared	2	1	0	0	0	1	7.36082e-18	2.576e-17
ENSMUSG00000074934	MGI:1344337	Grem1	5	shared	2	1	0	0	0	1	6.03442e-10	1.6884e-09
ENSMUSG00000032216	MGI:97297	Nedd4	4	shared	2	0	1	1	0	NA	0.000217594	0.000507719
ENSMUSG00000032291	MGI:88490	Crabp1	2	shared	2	1	NA	NA	NA	1	0.00621521	0.0124304
ENSMUSG00000037411	MGI:97608	Serpine1	5	shared	2	1	1	0	0	0	0.0365449	0.0639536
ENSMUSG00000001025	MGI:1339467	S100a6	4	shared	2	1	NA	0	0	1	0.114965	0.178835
ENSMUSG00000026674	MGI:1345277	Ddr2	5	shared	2	0	1	0	0	1	0.274352	0.384093
ENSMUSG00000035202	MGI:2142973	Lars2	2	shared	2	1	1	NA	NA	NA	0.349541	0.44487
ENSMUSG00000063229	MGI:96759	Ldha	3	shared	2	1	0	NA	NA	1	0.501288	0.569399
ENSMUSG00000026069	MGI:98427	Il1rl1	4	shared	2	0	1	1	0	NA	0.528727	0.569399
ENSMUSG00000029313	MGI:1100819	Aff1	3	shared	2	0	1	NA	NA	1	1	1
ENSMUSG00000058013	MGI:1277214	41528	4	unique	1	0	0	0	NA	1	--	--
ENSMUSG00000040359	MGI:1914740	1810074P20Rik	4	unique	1	0	0	0	1	NA	--	--
ENSMUSG00000028439	MGI:1919151	2310028H24Rik	4	unique	1	0	NA	0	1	0	--	--
ENSMUSG00000021711	MGI:1914225	2410002O22Rik	4	unique	1	0	0	0	1	NA	--	--
ENSMUSG00000024048	MGI:1914518	2900073G15Rik	5	unique	1	0	0	0	0	1	--	--
ENSMUSG00000052353	MGI:2443629	9930013L23Rik	3	unique	1	0	NA	1	NA	0	--	--
ENSMUSG00000035783	MGI:87909	Acta2	3	unique	1	0	NA	NA	0	1	--	--
ENSMUSG00000011256	MGI:105377	Adam19	2	unique	1	1	NA	NA	NA	0	--	--
ENSMUSG00000022894	MGI:1346321	Adamts5	4	unique	1	0	0	0	NA	1	--	--
ENSMUSG00000027597	MGI:87968	Ahcy	5	unique	1	1	0	0	0	0	--	--
ENSMUSG00000032531	MGI:1929286	Amotl2	3	unique	1	NA	1	0	NA	0	--	--
ENSMUSG00000027712	MGI:106008	Anxa5	4	unique	1	1	0	NA	0	0	--	--
ENSMUSG00000004655	MGI:103201	Aqp1	4	unique	1	0	1	0	0	NA	--	--
ENSMUSG00000032468	MGI:1921375	Armc8	4	unique	1	0	NA	0	1	0	--	--
ENSMUSG00000038539	MGI:2141857	Atf5	4	unique	1	1	0	NA	0	0	--	--
ENSMUSG00000025612	MGI:894680	Bach1	4	unique	1	0	0	NA	1	0	--	--
ENSMUSG00000030268	MGI:104861	Bcat1	4	unique	1	0	0	0	NA	1	--	--
ENSMUSG00000040565	MGI:2147538	Btaf1	5	unique	1	0	0	0	1	0	--	--
ENSMUSG00000017446	MGI:1919254	C1qtnf1	2	unique	1	0	NA	NA	1	NA	--	--
ENSMUSG00000058914	MGI:1932136	C1qtnf3	4	unique	1	0	1	0	NA	0	--	--
ENSMUSG00000003814	MGI:88252	Calr	4	unique	1	0	0	0	NA	1	--	--
ENSMUSG00000030714	MGI:1922815	Ccdc101	1	unique	1	NA	NA	NA	1	NA	--	--
ENSMUSG00000038127	MGI:1914751	Ccdc50	4	unique	1	0	0	NA	1	0	--	--
ENSMUSG00000022665	MGI:1915146	Ccdc80	5	unique	1	0	0	0	0	1	--	--
ENSMUSG00000000184	MGI:88314	Ccnd2	4	unique	1	1	NA	0	0	0	--	--
ENSMUSG00000023087	MGI:109382	Ccrn4l	3	unique	1	0	0	NA	NA	1	--	--
ENSMUSG00000034024	MGI:107186	Cct2	2	unique	1	0	NA	NA	NA	1	--	--
ENSMUSG00000056481	MGI:1917695	Cd248	3	unique	1	1	NA	0	NA	0	--	--
ENSMUSG00000032679	MGI:109177	Cd59a	5	unique	1	0	0	1	0	0	--	--
ENSMUSG00000037242	MGI:1352754	Clic4	4	unique	1	0	1	NA	0	0	--	--
ENSMUSG00000032332	MGI:88448	Col12a1	5	unique	1	0	1	0	0	0	--	--
ENSMUSG00000029661	MGI:88468	Col1a2	4	unique	1	0	1	0	0	NA	--	--
ENSMUSG00000022483	MGI:88452	Col2a1	4	unique	1	1	0	0	0	NA	--	--
ENSMUSG00000031502	MGI:88454	Col4a1	4	unique	1	0	0	NA	0	1	--	--
ENSMUSG00000026042	MGI:88458	Col5a2	5	unique	1	1	0	0	0	0	--	--
ENSMUSG00000001119	MGI:88459	Col6a1	2	unique	1	1	NA	NA	NA	0	--	--
ENSMUSG00000048126	MGI:88461	Col6a3	4	unique	1	0	0	NA	0	1	--	--
ENSMUSG00000014599	MGI:1339753	Csf1	2	unique	1	NA	NA	NA	0	1	--	--
ENSMUSG00000032911	MGI:2153093	Cspg4	2	unique	1	1	NA	NA	NA	0	--	--
ENSMUSG00000019997	MGI:95537	Ctgf	3	unique	1	1	0	0	NA	NA	--	--
ENSMUSG00000021939	MGI:88561	Ctsb	4	unique	1	1	NA	0	0	0	--	--
ENSMUSG00000028111	MGI:107823	Ctsk	4	unique	1	0	0	1	NA	0	--	--
ENSMUSG00000032872	MGI:2386848	Cyb5r4	5	unique	1	0	0	0	1	0	--	--
ENSMUSG00000037266	MGI:106498	D4Wsu53e	2	unique	1	1	NA	NA	0	NA	--	--
ENSMUSG00000028351	MGI:1928478	Dbc1	3	unique	1	0	NA	NA	0	1	--	--
ENSMUSG00000025408	MGI:109247	Ddit3	1	unique	1	NA	NA	NA	NA	1	--	--
ENSMUSG00000042569	MGI:2384931	Dhrs7b	2	unique	1	0	NA	NA	1	NA	--	--
ENSMUSG00000034278	MGI:1916658	Dnajc17	5	unique	1	0	0	0	1	0	--	--
ENSMUSG00000078190	MGI:3052332	Dnm3os	3	unique	1	0	0	NA	1	NA	--	--
ENSMUSG00000026131	MGI:104627	Dst	5	unique	1	0	1	0	0	0	--	--
ENSMUSG00000018707	MGI:103147	Dync1h1	3	unique	1	0	NA	0	NA	1	--	--
ENSMUSG00000028108	MGI:103060	Ecm1	5	unique	1	0	1	0	0	0	--	--
ENSMUSG00000055762	MGI:1913906	Eef1d	4	unique	1	0	NA	0	1	0	--	--
ENSMUSG00000034994	MGI:95288	Eef2	2	unique	1	1	NA	NA	NA	0	--	--
ENSMUSG00000022336	MGI:99257	Eif3e	5	unique	1	0	0	0	1	0	--	--
ENSMUSG00000063524	MGI:95393	Eno1	5	unique	1	0	1	0	0	0	--	--
ENSMUSG00000015766	MGI:104684	Eps8	5	unique	1	0	0	0	0	1	--	--
ENSMUSG00000021171	MGI:1261845	Esyt2	4	unique	1	0	1	NA	0	0	--	--
ENSMUSG00000028128	MGI:88381	F3	4	unique	1	0	NA	1	0	0	--	--
ENSMUSG00000070047	MGI:109168	Fat1	2	unique	1	0	NA	NA	NA	1	--	--
ENSMUSG00000064080	MGI:95488	Fbln2	3	unique	1	1	0	NA	NA	0	--	--
ENSMUSG00000027204	MGI:95489	Fbn1	5	unique	1	0	1	0	0	0	--	--
ENSMUSG00000059743	MGI:104888	Fdps	1	unique	1	1	NA	NA	NA	NA	--	--
ENSMUSG00000037946	MGI:1353657	Fgd3	2	unique	1	0	NA	NA	NA	1	--	--
ENSMUSG00000031565	MGI:95522	Fgfr1	5	unique	1	0	0	0	0	1	--	--
ENSMUSG00000025278	MGI:2446089	Flnb	5	unique	1	1	0	0	0	0	--	--
ENSMUSG00000015312	MGI:107776	Gadd45b	2	unique	1	0	NA	NA	NA	1	--	--
ENSMUSG00000038296	MGI:2446239	Galntl4	3	unique	1	0	NA	NA	1	0	--	--
ENSMUSG00000053332	MGI:95659	Gas5	3	unique	1	1	0	NA	NA	0	--	--
ENSMUSG00000025224	MGI:1861607	Gbf1	5	unique	1	0	0	0	1	0	--	--
ENSMUSG00000046352	MGI:95720	Gjb2	1	unique	1	1	NA	NA	NA	NA	--	--
ENSMUSG00000032562	MGI:95772	Gnai2	5	unique	1	0	0	0	0	1	--	--
ENSMUSG00000000001	MGI:95773	Gnai3	2	unique	1	0	NA	NA	1	NA	--	--
ENSMUSG00000029816	MGI:1934765	Gpnmb	1	unique	1	1	NA	NA	NA	NA	--	--
ENSMUSG00000031486	MGI:1925810	Gpr124	3	unique	1	0	NA	NA	0	1	--	--
ENSMUSG00000050069	MGI:1344367	Grem2	5	unique	1	0	0	0	0	1	--	--
ENSMUSG00000028980	MGI:2140356	H6pd	5	unique	1	0	0	0	1	0	--	--
ENSMUSG00000035181	MGI:2444133	Heatr5a	4	unique	1	0	1	0	NA	0	--	--
ENSMUSG00000005413	MGI:96163	Hmox1	1	unique	1	1	NA	NA	NA	NA	--	--
ENSMUSG00000026864	MGI:95835	Hspa5	3	unique	1	1	NA	NA	0	0	--	--
ENSMUSG00000032115	MGI:108030	Hyou1	4	unique	1	0	1	0	0	NA	--	--
ENSMUSG00000007872	MGI:96398	Id3	1	unique	1	NA	NA	NA	NA	1	--	--
ENSMUSG00000053560	MGI:104815	Ier2	4	unique	1	0	0	0	NA	1	--	--
ENSMUSG00000056708	MGI:1337072	Ier5	2	unique	1	0	NA	NA	NA	1	--	--
ENSMUSG00000039323	MGI:96437	Igfbp2	3	unique	1	0	NA	0	NA	1	--	--
ENSMUSG00000041324	MGI:96570	Inhba	2	unique	1	0	1	NA	NA	NA	--	--
ENSMUSG00000030536	MGI:1352757	Iqgap1	5	unique	1	0	1	0	0	0	--	--
ENSMUSG00000015533	MGI:96600	Itga2	2	unique	1	0	NA	NA	1	NA	--	--
ENSMUSG00000027276	MGI:1095416	Jag1	5	unique	1	0	0	1	0	0	--	--
ENSMUSG00000052837	MGI:96647	Junb	4	unique	1	0	0	0	NA	1	--	--
ENSMUSG00000010830	MGI:2145953	Kdelr3	5	unique	1	0	0	0	1	0	--	--
ENSMUSG00000055707	MGI:2443079	Klhl26	4	unique	1	0	0	NA	0	1	--	--
ENSMUSG00000015647	MGI:105382	Lama5	5	unique	1	0	1	0	0	0	--	--
ENSMUSG00000000693	MGI:1337004	Loxl3	5	unique	1	1	0	0	0	0	--	--
ENSMUSG00000002020	MGI:99502	Ltbp2	2	unique	1	0	NA	NA	NA	1	--	--
ENSMUSG00000024940	MGI:1101355	Ltbp3	3	unique	1	1	NA	0	NA	0	--	--
ENSMUSG00000075602	MGI:107527	Ly6a	4	unique	1	0	NA	0	0	1	--	--
ENSMUSG00000031833	MGI:2683541	Mast3	4	unique	1	0	0	NA	1	0	--	--
ENSMUSG00000032135	MGI:1933966	Mcam	5	unique	1	0	1	0	0	0	--	--
ENSMUSG00000019179	MGI:97050	Mdh2	2	unique	1	0	NA	NA	NA	1	--	--
ENSMUSG00000034297	MGI:3029632	Med13	4	unique	1	0	0	NA	1	0	--	--
ENSMUSG00000045039	MGI:2446294	Megf8	2	unique	1	0	NA	NA	NA	1	--	--
ENSMUSG00000030218	MGI:96976	Mgp	5	unique	1	1	0	0	0	0	--	--
ENSMUSG00000038244	MGI:2444947	Mical2	5	unique	1	0	1	0	0	0	--	--
ENSMUSG00000033039	MGI:105870	Micall1	3	unique	1	0	1	0	NA	NA	--	--
ENSMUSG00000031004	MGI:106035	Mki67	2	unique	1	1	NA	NA	NA	0	--	--
ENSMUSG00000028690	MGI:1914346	Mmachc	2	unique	1	0	NA	NA	1	NA	--	--
ENSMUSG00000031740	MGI:97009	Mmp2	5	unique	1	1	0	0	0	0	--	--
ENSMUSG00000049960	MGI:1913492	Mrps16	2	unique	1	0	NA	NA	1	NA	--	--
ENSMUSG00000052727	MGI:1306778	Mtap1b	5	unique	1	0	0	0	0	1	--	--
ENSMUSG00000045636	MGI:2142572	Mtus1	5	unique	1	0	0	0	0	1	--	--
ENSMUSG00000022443	MGI:107717	Myh9	4	unique	1	1	NA	0	0	0	--	--
ENSMUSG00000034868	MGI:107494	Myl12b	4	unique	1	0	NA	0	0	1	--	--
ENSMUSG00000090841	MGI:109318	Myl6	2	unique	1	0	NA	NA	NA	1	--	--
ENSMUSG00000022020	MGI:1914147	Naa16	2	unique	1	0	NA	NA	1	NA	--	--
ENSMUSG00000062661	MGI:109166	Ncs1	4	unique	1	0	NA	0	1	0	--	--
ENSMUSG00000018736	MGI:1932915	Ndel1	3	unique	1	0	0	NA	1	NA	--	--
ENSMUSG00000033016	MGI:102469	Nfatc1	4	unique	1	0	0	NA	1	0	--	--
ENSMUSG00000021806	MGI:1298229	Nid2	5	unique	1	0	0	0	0	1	--	--
ENSMUSG00000026036	MGI:1929485	Nif3l1	2	unique	1	0	NA	NA	1	NA	--	--
ENSMUSG00000031661	MGI:2135954	Nkd1	2	unique	1	NA	NA	0	1	NA	--	--
ENSMUSG00000002393	MGI:1352453	Nr2f6	4	unique	1	0	0	NA	0	1	--	--
ENSMUSG00000025810	MGI:106206	Nrp1	4	unique	1	0	0	0	NA	1	--	--
ENSMUSG00000039183	MGI:1347072	Nubp2	5	unique	1	0	0	0	1	0	--	--
ENSMUSG00000011179	MGI:97402	Odc1	5	unique	1	0	1	0	0	0	--	--
ENSMUSG00000029718	MGI:105099	Pcolce	4	unique	1	0	0	NA	0	1	--	--
ENSMUSG00000015354	MGI:1923727	Pcolce2	2	unique	1	0	NA	NA	1	NA	--	--
ENSMUSG00000055044	MGI:1860611	Pdlim1	5	unique	1	0	0	0	0	1	--	--
ENSMUSG00000028273	MGI:1927489	Pdlim5	5	unique	1	0	1	0	0	0	--	--
ENSMUSG00000035357	MGI:1933157	Pdzrn3	5	unique	1	0	0	0	1	0	--	--
ENSMUSG00000021196	MGI:1891833	Pfkp	4	unique	1	0	NA	0	0	1	--	--
ENSMUSG00000017721	MGI:1926178	Pigt	5	unique	1	0	0	0	0	1	--	--
ENSMUSG00000022565	MGI:1277961	Plec	3	unique	1	0	NA	0	NA	1	--	--
ENSMUSG00000028494	MGI:87920	Plin2	4	unique	1	0	1	NA	0	0	--	--
ENSMUSG00000030084	MGI:107685	Plxna1	5	unique	1	0	1	0	0	0	--	--
ENSMUSG00000034453	MGI:1917678	Polr3b	3	unique	1	0	NA	0	1	NA	--	--
ENSMUSG00000027750	MGI:1926321	Postn	3	unique	1	1	NA	0	NA	0	--	--
ENSMUSG00000029372	MGI:1888712	Ppbp	2	unique	1	1	NA	0	NA	NA	--	--
ENSMUSG00000005161	MGI:109486	Prdx2	4	unique	1	0	1	0	NA	0	--	--
ENSMUSG00000029528	MGI:108295	Pxn	4	unique	1	0	0	NA	1	0	--	--
ENSMUSG00000017831	MGI:105926	Rab5a	5	unique	1	0	0	0	1	0	--	--
ENSMUSG00000026721	MGI:1352507	Rabgap1l	1	unique	1	NA	NA	NA	1	NA	--	--
ENSMUSG00000025340	MGI:1929459	Rabgef1	2	unique	1	0	NA	NA	NA	1	--	--
ENSMUSG00000022621	MGI:1915958	Rabl2	4	unique	1	0	0	NA	1	0	--	--
ENSMUSG00000033762	MGI:1931028	Recql4	3	unique	1	0	NA	0	1	NA	--	--
ENSMUSG00000046768	MGI:1931551	Rhoj	4	unique	1	0	0	0	NA	1	--	--
ENSMUSG00000034681	MGI:97960	Rnps1	5	unique	1	0	0	0	1	0	--	--
ENSMUSG00000020580	MGI:107926	Rock2	5	unique	1	0	1	0	0	0	--	--
ENSMUSG00000032238	MGI:104661	Rora	2	unique	1	0	NA	NA	1	NA	--	--
ENSMUSG00000074129	MGI:1351455	Rpl13a	2	unique	1	1	NA	NA	0	NA	--	--
ENSMUSG00000060036	MGI:1351605	Rpl3	4	unique	1	0	0	0	NA	1	--	--
ENSMUSG00000058558	MGI:102854	Rpl5	1	unique	1	1	NA	NA	NA	NA	--	--
ENSMUSG00000007892	MGI:1927099	Rplp1	5	unique	1	0	1	0	0	0	--	--
ENSMUSG00000027651	MGI:1917720	Rprd1b	5	unique	1	0	0	0	1	0	--	--
ENSMUSG00000028081	MGI:1202063	Rps3a	4	unique	1	0	1	NA	0	0	--	--
ENSMUSG00000041959	MGI:1339468	S100a10	4	unique	1	0	1	0	NA	0	--	--
ENSMUSG00000027907	MGI:1338798	S100a11	4	unique	1	0	1	0	NA	0	--	--
ENSMUSG00000052833	MGI:1929264	Sae1	3	unique	1	0	NA	NA	1	0	--	--
ENSMUSG00000020964	MGI:1329016	Sel1l	3	unique	1	0	1	0	NA	NA	--	--
ENSMUSG00000038264	MGI:1306826	Sema7a	2	unique	1	0	1	NA	NA	NA	--	--
ENSMUSG00000028902	MGI:1922312	Sf3a3	2	unique	1	0	NA	NA	1	NA	--	--
ENSMUSG00000025036	MGI:2137678	Sfxn2	5	unique	1	0	0	0	1	0	--	--
ENSMUSG00000027397	MGI:108392	Slc20a1	2	unique	1	1	NA	NA	NA	0	--	--
ENSMUSG00000056427	MGI:1315202	Slit3	4	unique	1	0	NA	0	0	1	--	--
ENSMUSG00000025060	MGI:103241	Slk	3	unique	1	0	NA	0	1	NA	--	--
ENSMUSG00000020463	MGI:2144474	Smek2	4	unique	1	0	NA	0	1	0	--	--
ENSMUSG00000030655	MGI:1919742	Smg1	4	unique	1	0	1	NA	0	0	--	--
ENSMUSG00000001018	MGI:1333745	Snapin	4	unique	1	0	NA	0	1	0	--	--
ENSMUSG00000005233	MGI:1913692	Spc25	5	unique	1	0	0	0	1	0	--	--
ENSMUSG00000054408	MGI:1923937	Spcs3	4	unique	1	0	0	NA	1	0	--	--
ENSMUSG00000042331	MGI:2442356	Specc1	5	unique	1	0	0	1	0	0	--	--
ENSMUSG00000029304	MGI:98389	Spp1	2	unique	1	1	NA	NA	NA	0	--	--
ENSMUSG00000022114	MGI:1345138	Spry2	3	unique	1	1	0	NA	NA	0	--	--
ENSMUSG00000028369	MGI:1928849	Svep1	4	unique	1	0	0	0	NA	1	--	--
ENSMUSG00000032085	MGI:106012	Tagln	2	unique	1	0	1	NA	NA	NA	--	--
ENSMUSG00000037820	MGI:98731	Tgm2	3	unique	1	0	1	NA	NA	0	--	--
ENSMUSG00000017466	MGI:98753	Timp2	4	unique	1	0	NA	1	0	0	--	--
ENSMUSG00000020044	MGI:98754	Timp3	4	unique	1	0	NA	1	0	0	--	--
ENSMUSG00000023905	MGI:1351484	Tnfrsf12a	4	unique	1	1	0	0	0	NA	--	--
ENSMUSG00000031529	MGI:1341087	Tnks	5	unique	1	0	0	0	0	1	--	--
ENSMUSG00000038085	MGI:98809	Tpm1	5	unique	1	0	0	0	1	0	--	--
ENSMUSG00000002871	MGI:1345190	Tpra1	5	unique	1	0	0	0	1	0	--	--
ENSMUSG00000034292	MGI:1921269	Traf3ip1	3	unique	1	0	0	NA	1	NA	--	--
ENSMUSG00000032554	MGI:98821	Trf	1	unique	1	NA	NA	NA	1	NA	--	--
ENSMUSG00000043091	MGI:1095409	Tuba1c	1	unique	1	1	NA	NA	NA	NA	--	--
ENSMUSG00000034485	MGI:1919815	Uaca	3	unique	1	0	1	NA	NA	0	--	--
ENSMUSG00000035898	MGI:1913894	Uba6	4	unique	1	0	1	0	0	NA	--	--
ENSMUSG00000008348	MGI:98889	Ubc	4	unique	1	0	0	1	0	NA	--	--
ENSMUSG00000032415	MGI:1917598	Ube2cbp	2	unique	1	0	NA	NA	1	NA	--	--
ENSMUSG00000029223	MGI:103149	Uchl1	4	unique	1	0	1	0	NA	0	--	--
ENSMUSG00000020099	MGI:894703	Unc5b	2	unique	1	1	NA	NA	NA	0	--	--
ENSMUSG00000056342	MGI:109473	Usp34	4	unique	1	0	NA	0	1	0	--	--
ENSMUSG00000007029	MGI:90675	Vars	3	unique	1	NA	NA	0	1	0	--	--
ENSMUSG00000027962	MGI:98926	Vcam1	3	unique	1	0	NA	1	0	NA	--	--
ENSMUSG00000021823	MGI:98927	Vcl	5	unique	1	0	1	0	0	0	--	--
ENSMUSG00000026728	MGI:98932	Vim	2	unique	1	1	NA	NA	NA	0	--	--
ENSMUSG00000027656	MGI:1328326	Wisp2	3	unique	1	0	1	NA	0	NA	--	--
ENSMUSG00000067942	MGI:108187	Zfp160	4	unique	1	0	0	NA	1	0	--	--
